# Supplementary material for: Identification and Validation of a Prognostic Immune-Related Gene Signature in Esophageal Squamous Cell Carcinoma
Source: Front Bioeng Biotechnol. 2022 Apr 13;10:850669. doi: 10.3389/fbioe.2022.850669 (PMC9043362; doi:10.3389/fbioe.2022.850669)
Supplement: Supplementary file 10 [file Table8.XLSX]

## Sheet: different genes
gene	conMean	treatMean	logFC	pValue	fdr
RAB4B	6.49457	2.40918	-4.08539	1.78189e-39	1.1285e-38
TIGAR	1.88583	3.40967	1.52384	1.71209e-32	5.40694e-32
RNF44	6.47809	7.57134	1.09326	1.39276e-06	1.76314e-06
RPL23A	57.0248	49.9045	-7.12032	1.41067e-08	1.90846e-08
ARL8B	9.5085	13.1589	3.65044	1.84328e-22	3.75039e-22
FMO2	8.31438	2.76792	-5.54646	1.61573e-26	3.80536e-26
AP000892.3	3.95171	0.148296	-3.80341	1.13449e-41	2.21397e-40
AF111169.1	1.50719	0.000652444	-1.50654	1.52806e-42	1.16112e-40
PFN2	4.94952	19.6835	14.734	7.76888e-33	2.50386e-32
RAD23A	10.0763	16.6482	6.57191	3.91016e-36	1.61325e-35
SERPINB11	3.8525	1.08074	-2.77176	1.37637e-23	2.91878e-23
AL671277.1	1.13464	4.4947	3.36006	3.77716e-30	1.04956e-29
IL32	5.10409	7.50487	2.40078	0.000236718	0.000279328
RPS4XP3	0.180391	1.79329	1.6129	6.92598e-41	6.87405e-40
NUCB2	13.0207	3.59717	-9.4235	2.29649e-40	1.82638e-39
SPATA2	2.13621	4.33627	2.20007	3.10772e-42	1.21521e-40
SERTAD2	4.93273	6.91942	1.98669	1.91266e-16	3.23647e-16
OTUD1	2.54743	5.27004	2.72261	7.16952e-36	2.89176e-35
IGHV3-43	0.605455	2.26228	1.65683	1.21255e-08	1.64412e-08
MTRF1	3.15427	2.0258	-1.12847	6.40696e-33	2.07344e-32
MTND2P28	26.302	35.4958	9.19381	0.0117886	0.0130285
ENTPD1-AS1	1.32965	0.141202	-1.18845	4.7665e-41	5.37674e-40
AC011481.1	7.44767	0.282642	-7.16503	5.91474e-41	6.12011e-40
MYOM2	1.63896	0.268477	-1.37048	5.50745e-36	2.24445e-35
MAP9	0.559031	1.59035	1.03132	2.5106e-16	4.23587e-16
APIP	3.85998	2.37204	-1.48793	2.45507e-32	7.68076e-32
MAF1	10.0542	15.962	5.9078	1.14032e-35	4.52542e-35
NPHP3	3.6773	1.32861	-2.34869	2.25967e-40	1.79906e-39
MITD1	5.76741	2.80937	-2.95804	4.97622e-40	3.55259e-39
ZMAT3	1.48166	3.62558	2.14392	4.01961e-40	2.94461e-39
SPCS2	11.9339	6.9501	-4.98378	4.29835e-34	1.50306e-33
DESI2	3.4552	7.81541	4.36021	1.82507e-42	1.16112e-40
MT1A	3.70215	1.47075	-2.2314	1.75937e-21	3.46232e-21
NLGN2	3.13619	5.34172	2.20553	1.32305e-21	2.61257e-21
PKMYT1	3.8643	5.19542	1.33112	8.32029e-11	1.19999e-10
FAM89B	6.79614	8.05019	1.25405	2.13557e-07	2.78004e-07
PHF1	7.83166	5.39798	-2.43367	3.86055e-26	8.9603e-26
IGHV1-24	1.14027	5.16376	4.02349	4.18342e-14	6.60486e-14
DIPK1A	1.91453	4.24388	2.32934	4.4302e-36	1.82033e-35
ANKMY1	2.92321	0.991219	-1.93199	2.84447e-41	4.17287e-40
PSMB6	14.6006	17.7964	3.19582	6.90735e-12	1.02917e-11
GUCY1A1	1.16389	3.06017	1.89628	4.70582e-28	1.1834e-27
FBXO45	2.64678	5.49398	2.8472	2.0466e-39	1.28198e-38
HLA-DRB1	8.65901	29.2571	20.598	2.85404e-25	6.41518e-25
KLK8	15.9109	4.96856	-10.9423	4.19907e-30	1.16503e-29
HSPE1-MOB4	2.39114	0.0223682	-2.36877	8.68994e-30	2.37981e-29
RBM15B	3.98247	6.27952	2.29705	2.20198e-39	1.36776e-38
ZNF880	2.26453	1.03591	-1.22862	4.60081e-24	9.90189e-24
NCAPG	2.12723	4.48471	2.35748	7.21579e-35	2.67296e-34
SETP14	0.504028	1.96753	1.4635	4.22314e-40	3.07497e-39
MELTF	1.74747	4.40847	2.661	8.25552e-26	1.89241e-25
UPP1	15.5896	6.60925	-8.98034	1.76761e-25	3.9983e-25
AC008760.1	2.63484	0.951154	-1.68368	1.73105e-35	6.77316e-35
PSPC1P1	0.308221	2.1529	1.84468	3.77867e-18	6.71024e-18
KLK10	26.9624	18.8302	-8.13222	1.35305e-09	1.88702e-09
KDM5B	5.26747	6.73482	1.46735	3.46942e-13	5.35748e-13
MIR4292	0.0110169	4.16172	4.1507	1.55396e-42	1.16112e-40
FRMD8	6.16608	9.80516	3.63907	2.79587e-31	8.25391e-31
HELZ2	3.21808	7.07077	3.85269	3.05349e-30	8.52572e-30
MINDY4	1.28012	0.179106	-1.10101	3.96935e-41	4.86733e-40
ZNF767P	3.80019	2.36525	-1.43494	1.78942e-32	5.64627e-32
SNORD99	0.0138573	3.11913	3.10528	3.32458e-42	1.25096e-40
SLC2A1	19.2836	52.4541	33.1705	1.81944e-19	3.37104e-19
AC104825.1	2.76623	1.37099	-1.39524	1.33415e-23	2.83306e-23
LZIC	4.0464	5.59043	1.54403	3.15269e-27	7.62672e-27
FOXD2-AS1	0.419198	1.75611	1.33691	1.29098e-35	5.10214e-35
MT-ND1	410.494	786.031	375.537	3.54132e-18	6.29586e-18
CAMK1	3.00584	0.843877	-2.16197	1.68317e-39	1.0758e-38
H6PD	3.59696	6.86816	3.2712	1.42827e-38	7.76082e-38
GRAMD1C	2.6704	1.14507	-1.52533	1.85657e-30	5.24644e-30
WFDC1	2.5356	0.516714	-2.01889	4.94741e-37	2.22684e-36
ADIRF-AS1	3.5074	2.27549	-1.23191	9.60838e-15	1.55086e-14
MIR3936HG	1.69629	0.586229	-1.11006	4.57129e-38	2.32095e-37
FCGR2B	2.00901	0.603839	-1.40517	2.74245e-29	7.35095e-29
HOXC13	0.103923	2.65639	2.55247	1.07455e-39	7.18133e-39
AC009065.8	1.04879	0.000652444	-1.04814	1.52806e-42	1.16112e-40
PHYKPL	6.82015	2.70778	-4.11236	4.31351e-41	5.11842e-40
NME1-NME2	3.83427	0.692453	-3.14182	2.94126e-40	2.23948e-39
PHLDA2	6.48715	16.8427	10.3555	7.05855e-29	1.85177e-28
CBL	1.91788	3.58044	1.66255	2.78233e-38	1.46417e-37
SMAP1	5.31129	3.0997	-2.21159	1.10611e-35	4.39522e-35
EVPL	20.1668	14.3021	-5.8647	2.33308e-12	3.52013e-12
RDH12	4.45278	1.63248	-2.8203	6.26059e-24	1.34294e-23
IL27RA	1.35587	4.92003	3.56416	2.29512e-38	1.21766e-37
WDR70	4.38423	2.97564	-1.40859	9.14195e-33	2.9336e-32
CENPH	2.53461	4.05065	1.51603	6.25807e-25	1.39044e-24
EPB41L2	4.5898	3.10129	-1.48851	5.95426e-21	1.15317e-20
C1orf35	5.07516	3.52396	-1.5512	4.92477e-32	1.5145e-31
LDHA	34.055	51.6562	17.6012	6.44903e-13	9.87808e-13
XCL1	0.19403	1.71588	1.52185	1.37985e-33	4.63622e-33
CYP4F22	3.75463	2.50382	-1.25081	1.76179e-09	2.45053e-09
AC005165.1	1.11447	0.1087	-1.00577	9.73137e-37	4.2665e-36
ATP6AP2	8.44221	15.8869	7.44473	8.81822e-42	1.84271e-40
MTND4P24	0.0329962	4.40047	4.36747	3.05572e-42	1.21521e-40
NOP16	7.32432	4.69787	-2.62645	1.45691e-30	4.14415e-30
ACOX2	3.76016	0.577325	-3.18284	1.9162e-40	1.55835e-39
INTS13	4.08178	6.23132	2.14953	2.28209e-30	6.41918e-30
PPP1R7	10.6351	5.98453	-4.65056	5.91317e-41	6.12011e-40
HNRNPA2B1	33.0229	27.3666	-5.65629	7.15356e-13	1.0945e-12
MIR100HG	2.93433	1.35923	-1.5751	2.71033e-25	6.0959e-25
CYP2E1	4.20836	0.343466	-3.86489	1.49588e-40	1.26134e-39
IGLC7	1.07647	2.71556	1.63909	0.000113746	0.000135487
RPS13P2	0.923251	4.2594	3.33615	5.99481e-42	1.435e-40
HSDL2	4.40368	6.30673	1.90305	5.42988e-28	1.36206e-27
PTCD3	6.60315	4.24978	-2.35338	1.36199e-37	6.56613e-37
STARD5	4.88435	1.53231	-3.35204	2.37407e-40	1.8687e-39
NTM	2.6004	1.23138	-1.36902	0.00655487	0.00732117
LSM4	11.4243	10.2559	-1.16842	1.10671e-06	1.40734e-06
RPL41	211.902	60.1134	-151.789	2.66553e-41	4.07319e-40
TP73-AS1	3.06086	1.67495	-1.38591	3.12802e-32	9.72758e-32
SERPINB3	34.0738	18.6377	-15.4361	5.26919e-14	8.30358e-14
MZT2A	12.2873	5.07808	-7.20926	7.37409e-40	5.06782e-39
EXOSC7	6.76986	3.3577	-3.41216	3.14362e-41	4.3781e-40
IGHGP	0.538889	1.94505	1.40616	4.25902e-13	6.56111e-13
RECQL5	10.3451	2.97867	-7.36641	8.66026e-41	8.05353e-40
FAM86C1	2.02413	3.43073	1.4066	4.79388e-21	9.29915e-21
PIGA	2.656	3.70217	1.04617	5.7296e-18	1.01159e-17
AC136632.1	2.40115	5.73419	3.33304	6.32214e-41	6.40197e-40
MSANTD3	3.02814	5.21613	2.18799	1.07732e-33	3.64651e-33
PLOD1	4.99802	11.9222	6.92415	1.19367e-34	4.35002e-34
CD79B	1.79702	0.655916	-1.14111	1.95523e-27	4.78337e-27
DDX60L	1.75331	2.78154	1.02823	5.51566e-13	8.47087e-13
RCN3	3.27344	6.22029	2.94686	3.01482e-14	4.78737e-14
PPP4C	11.9853	13.2689	1.28358	0.000166556	0.000197427
ALDOA	88.3945	61.8083	-26.5861	8.56169e-20	1.59815e-19
NCEH1	1.57145	4.91649	3.34504	1.30901e-37	6.32457e-37
ZFYVE28	2.67444	0.886442	-1.788	4.7375e-40	3.39992e-39
RNF24	2.37837	4.32365	1.94528	1.51051e-32	4.78685e-32
LEMD2	7.76302	5.56076	-2.20226	6.93943e-37	3.07977e-36
VPS18	2.85945	4.82777	1.96832	4.53479e-38	2.30452e-37
UQCRB	22.9619	5.99118	-16.9707	3.34985e-41	4.48638e-40
PRRT1	2.78803	0.960946	-1.82709	1.66108e-37	7.92483e-37
RNF5	6.35072	12.2931	5.94235	5.28289e-42	1.38094e-40
NPIPB14P	3.8895	0.185859	-3.70364	3.1968e-41	4.41247e-40
AP006621.3	2.61354	1.52017	-1.09337	3.07303e-24	6.65813e-24
PLK3	6.5892	4.5078	-2.0814	1.46798e-11	2.16551e-11
MPLKIP	1.52176	3.203	1.68124	3.03944e-40	2.3064e-39
EN1	0.0319084	3.55287	3.52096	2.92144e-35	1.12039e-34
PEMT	5.37212	6.89903	1.52691	1.94475e-09	2.70058e-09
WNK4	3.24774	0.496127	-2.75161	3.52482e-29	9.38842e-29
LNPEP	2.85909	4.09319	1.2341	2.35815e-28	6.02115e-28
SNORA11F	0.318059	1.59889	1.28083	1.83024e-30	5.17601e-30
MRPL22	6.62902	3.11417	-3.51485	3.77486e-41	4.79641e-40
SLC7A11	1.14447	6.22307	5.0786	1.26258e-20	2.4239e-20
EEF1A1P11	0.570827	3.00121	2.43038	2.0717e-41	3.56209e-40
GABRA3	0.325419	1.68525	1.35983	2.49186e-27	6.07054e-27
DHDDS	5.79946	3.88636	-1.9131	1.97118e-34	7.07294e-34
MGA	1.79147	2.98267	1.1912	2.94102e-40	2.23948e-39
RMI2	3.02302	4.75776	1.73474	2.81809e-18	5.02892e-18
AC006064.4	1.10493	0.000652444	-1.10427	1.52802e-42	1.16112e-40
UROD	7.49089	5.67257	-1.81831	1.91888e-26	4.50542e-26
VPS45	5.5057	3.9451	-1.5606	1.50625e-35	5.92472e-35
USP18	1.7165	3.05137	1.33486	1.48145e-22	3.02317e-22
SOSTDC1	1.21623	4.68074	3.46451	1.52117e-07	1.98966e-07
CAND1	6.10823	7.61375	1.50553	1.22473e-05	1.50431e-05
PLEKHM1P1	4.87165	2.6498	-2.22186	2.82787e-33	9.33307e-33
CAPN3	4.65809	0.29011	-4.36798	1.78247e-41	3.17922e-40
TRAF3IP2	6.50315	4.95519	-1.54796	1.13326e-21	2.24386e-21
POGK	3.67938	6.14245	2.46307	5.8942e-42	1.42034e-40
PRKACB	2.16831	3.71871	1.5504	9.36586e-25	2.06715e-24
BCAP29	6.30434	4.28096	-2.02338	4.45224e-25	9.9566e-25
CLCA4	26.6801	8.66905	-18.0111	3.27654e-23	6.8518e-23
RHOT1P2	2.07148	0.851804	-1.21968	1.59645e-15	2.63287e-15
HOOK3	2.41661	5.14332	2.7267	5.22776e-40	3.70581e-39
DHX15	9.9078	7.92097	-1.98683	5.19374e-25	1.15724e-24
SNX19	4.77514	5.90405	1.12891	3.18709e-11	4.65831e-11
RPF1	5.28708	7.35614	2.06905	7.72292e-29	2.02269e-28
RAD54L	2.03276	3.16152	1.12875	1.81836e-20	3.47147e-20
CHORDC1	4.66633	2.92451	-1.74182	4.6705e-30	1.29452e-29
ATP6V0E1	19.2416	23.763	4.52134	1.24634e-13	1.94428e-13
AC245033.3	11.0709	0.407508	-10.6634	1.58549e-41	2.91311e-40
AC026470.1	7.06939	0.0146217	-7.05477	2.71538e-42	1.20298e-40
JMY	1.70766	3.59942	1.89176	9.90146e-40	6.65421e-39
RPL3P4	8.56931	17.3195	8.75017	4.16471e-33	1.36283e-32
TMEM86B	2.17497	0.666883	-1.50809	2.53605e-40	1.97335e-39
AC010655.3	2.06412	0.000652444	-2.06347	1.52811e-42	1.16112e-40
EIF3I	14.8626	26.2139	11.3513	1.65435e-39	1.05861e-38
TPO	1.34109	0.0983912	-1.2427	6.85517e-39	3.90652e-38
UBE2N	9.2451	6.58016	-2.66495	1.66062e-31	4.96713e-31
LSM2	6.94672	10.1704	3.22367	1.02149e-29	2.78904e-29
PDE1C	1.17035	0.168263	-1.00209	6.09463e-38	3.05343e-37
ABCA1	1.93875	4.27275	2.334	1.21067e-32	3.85668e-32
NIF3L1	3.9866	5.89416	1.90755	6.95101e-36	2.80981e-35
MMUT	3.75967	5.87124	2.11157	3.86827e-34	1.36002e-33
MRPS25	7.31459	3.24758	-4.06701	3.19625e-41	4.41247e-40
SIM2	6.12555	1.76481	-4.36074	5.9517e-36	2.41664e-35
ARHGAP23	8.57323	12.1284	3.5552	4.10654e-13	6.32976e-13
ZCCHC17	4.62268	6.77673	2.15405	2.58863e-37	1.20412e-36
GPR35	1.33988	0.291349	-1.04853	1.18668e-40	1.04226e-39
MZT1	2.49048	6.73355	4.24307	8.11114e-42	1.7474e-40
AC005832.4	1.65366	0.0328644	-1.6208	2.67763e-31	7.91475e-31
CREM	3.7566	2.50364	-1.25297	9.91818e-32	3.01025e-31
RASSF4	2.96632	1.38242	-1.5839	1.61864e-27	3.97497e-27
ZDHHC6	5.88513	4.82599	-1.05915	3.91232e-29	1.03913e-28
AC139768.1	2.39692	0.774433	-1.62248	3.79538e-39	2.25163e-38
CSPG4	2.26312	8.29517	6.03205	1.29967e-20	2.4938e-20
BIN3	5.12059	2.08157	-3.03902	3.04031e-41	4.26682e-40
PLP1	2.16914	0.355414	-1.81372	4.96314e-34	1.72454e-33
LYZ	5.76655	13.0282	7.26165	1.41627e-15	2.33818e-15
XYLT2	3.37001	5.11651	1.7465	1.24256e-31	3.7485e-31
DDX21	5.8969	15.1355	9.23858	5.91546e-41	6.12011e-40
SH3BGR	2.39845	1.31569	-1.08276	4.7476e-23	9.86793e-23
VAC14	4.62214	6.11046	1.48832	1.57345e-26	3.70817e-26
C21orf91	2.16199	4.47325	2.31126	3.56897e-30	9.92966e-30
SAP30	3.04642	4.48667	1.44024	1.24018e-24	2.72082e-24
ZFYVE19	6.37191	3.42531	-2.9466	2.31618e-40	1.84005e-39
NR2F1	3.34277	2.25193	-1.09084	8.40733e-16	1.39851e-15
MORF4L2	15.9342	23.2918	7.35756	5.49362e-29	1.44883e-28
LINC01145	2.8445	0.649963	-2.19453	1.02249e-40	9.23097e-40
NAA30	2.49639	3.64216	1.14577	2.56549e-32	8.02196e-32
PTGS2	1.15403	3.62699	2.47296	5.83373e-17	1.00133e-16
CCDC90B	5.56772	3.01604	-2.55168	7.4314e-39	4.22394e-38
UBE2Z	7.27394	9.48339	2.20945	2.54217e-27	6.18956e-27
CCDC167	5.05807	7.80242	2.74434	4.21888e-28	1.06265e-27
ICA1	4.31137	1.13603	-3.17533	4.29259e-37	1.94648e-36
RPL10P16	4.13194	6.51185	2.37992	2.58333e-26	6.04023e-26
OSBPL5	4.24095	2.89701	-1.34394	9.16453e-26	2.09685e-25
WDR36	2.65401	4.84167	2.18766	1.24461e-39	8.19332e-39
CRB3	7.37251	4.69387	-2.67864	6.74043e-22	1.34332e-21
XPO4	1.81547	3.37211	1.55664	1.5589e-37	7.46303e-37
TMEM30A	6.69018	13.2095	6.51936	1.23327e-41	2.38191e-40
AL138721.1	0.119483	1.98113	1.86164	1.09214e-39	7.26903e-39
ECHDC3	4.60113	3.39852	-1.20261	3.70054e-05	4.47971e-05
AKR1B15	1.46576	2.94486	1.47909	1.91548e-09	2.66094e-09
C8orf76	4.41251	2.76814	-1.64437	2.67207e-37	1.24035e-36
DDR1	15.741	18.4381	2.69717	0.00171722	0.00196307
SPI1	2.73987	5.14067	2.40079	2.21163e-22	4.49153e-22
ZNF780A	3.39704	1.42603	-1.97102	8.83034e-40	5.97421e-39
SLC9A1	4.59157	8.5416	3.95003	2.1827e-32	6.84985e-32
NBPF9	2.75722	1.10858	-1.64865	1.26509e-39	8.31813e-39
FBXO28	3.35634	5.98994	2.6336	1.11552e-41	2.18879e-40
PDIA3	17.7629	33.7549	15.9919	1.60048e-39	1.02773e-38
TTPAL	2.09464	4.29562	2.20099	1.7389e-39	1.10435e-38
UPF2	3.21358	5.59506	2.38148	3.83934e-41	4.82113e-40
ITGB3BP	3.72324	2.42552	-1.29772	4.19286e-32	1.29329e-31
TOR4A	2.49046	4.28716	1.7967	1.58563e-05	1.94304e-05
HAUS7	4.33736	0.697929	-3.63943	6.53571e-41	6.55181e-40
MED1	2.984	4.71672	1.73272	2.62452e-33	8.68282e-33
BNIP3P11	0.464285	1.63573	1.17145	5.38585e-31	1.56712e-30
CD164L2	4.56768	0.827035	-3.74065	6.2356e-36	2.52815e-35
RBM12	4.33624	6.2597	1.92346	2.664e-33	8.81077e-33
PDCD4	22.8058	7.25206	-15.5537	3.88411e-39	2.30052e-38
FP236383.3	47.8748	0.192139	-47.6827	1.04131e-41	2.08776e-40
WDR90	5.44424	3.30325	-2.14099	1.82017e-33	6.07295e-33
CASC19	0.76454	2.16516	1.40062	2.62372e-08	3.51803e-08
AC084018.2	1.30342	0.232726	-1.0707	1.16721e-40	1.03343e-39
AC103563.2	3.97861	0.550631	-3.42797	2.06685e-33	6.86887e-33
AL591846.1	4.45135	0.364962	-4.08638	1.07547e-15	1.78142e-15
SDAD1	3.7966	5.33452	1.53791	2.37707e-27	5.79484e-27
FCGRT	8.43604	5.39933	-3.03672	9.84659e-23	2.02101e-22
FTH1P7	1.91811	3.66725	1.74915	1.5555e-20	2.97584e-20
STXBP5-AS1	1.49657	0.325967	-1.17061	2.36538e-34	8.44054e-34
ZNF622	4.15505	6.70502	2.54997	2.7877e-39	1.69593e-38
ANXA3	9.2221	3.7873	-5.4348	7.54581e-31	2.17439e-30
SZRD1	8.87494	10.3215	1.4466	2.48683e-09	3.4442e-09
GPSM2	5.64503	4.11934	-1.52569	5.8538e-19	1.06768e-18
NPIPB3	9.1293	0.948997	-8.1803	5.01012e-41	5.527e-40
IGF1R	2.666	6.74939	4.08339	5.35744e-40	3.79022e-39
F2RL2	0.414532	2.8007	2.38617	2.63054e-30	7.37666e-30
PIH1D1	9.74071	5.45143	-4.28928	7.71076e-41	7.39016e-40
RPL38	58.5711	32.8783	-25.6928	1.16885e-33	3.9478e-33
PTPN12	6.48741	10.4398	3.95242	1.52996e-24	3.3472e-24
TBC1D3B	2.44118	0.0138618	-2.42732	2.14346e-42	1.16112e-40
RASD2	0.772371	2.72443	1.95206	6.45055e-29	1.69591e-28
ZNF318	2.34733	4.20973	1.8624	3.95831e-38	2.02656e-37
AC011933.1	0.0478166	2.23464	2.18682	4.73634e-42	1.35885e-40
PRRT2	2.10674	0.420886	-1.68586	2.07416e-37	9.7722e-37
RPS10-NUDT3	3.18077	0.0223559	-3.15842	9.27719e-42	1.91595e-40
TONSL	2.12938	4.71869	2.58931	3.48249e-38	1.80142e-37
ZNF664	5.59486	7.59973	2.00487	3.8404e-18	6.81766e-18
TYK2	10.7056	6.27394	-4.43162	1.75556e-37	8.34464e-37
PSMB5	11.7944	16.9136	5.11918	5.53885e-28	1.38876e-27
BDH1	8.75505	4.15187	-4.60318	1.07224e-35	4.26527e-35
LRIG1	3.66073	5.17804	1.51731	2.77619e-08	3.7193e-08
NOTCH2	5.1434	6.33852	1.19513	5.4282e-06	6.73826e-06
IGHV3-21	2.17208	8.9817	6.80962	5.50143e-16	9.20703e-16
RECQL	2.94946	4.92403	1.97457	8.10731e-31	2.33303e-30
FXYD6	4.1309	1.54133	-2.58957	1.04374e-31	3.16346e-31
MRPL10	5.45874	7.24918	1.79044	1.25407e-30	3.58068e-30
DPYSL3	5.20353	11.1532	5.94963	1.2649e-11	1.87045e-11
CXCL8	1.28639	12.0248	10.7384	1.11016e-33	3.75304e-33
NCAPH2	5.72335	7.22341	1.50006	7.35479e-15	1.19097e-14
RPS2P5	25.9031	39.3908	13.4877	3.05667e-09	4.22488e-09
ANTXR2	4.07077	2.87846	-1.19231	1.67005e-08	2.25304e-08
MICOS10	15.9833	3.78794	-12.1953	3.24703e-41	4.42545e-40
UBE2J1	4.35459	7.42498	3.07039	4.49847e-38	2.28712e-37
TNFAIP8L3	3.25286	2.1352	-1.11765	1.08954e-16	1.8565e-16
KIAA1324	0.806087	2.47617	1.67008	0.000546526	0.000635752
RPL23AP82	4.93142	1.55723	-3.37419	4.03606e-41	4.92167e-40
MZT2B	19.1051	9.95438	-9.15073	1.42686e-36	6.16231e-36
MCL1	18.3073	32.9437	14.6364	6.1887e-30	1.70842e-29
VCAM1	1.36885	3.28875	1.91991	2.75875e-12	4.15153e-12
POPDC3	0.31128	2.42941	2.11813	9.5e-12	1.4103e-11
ULK1	5.7346	7.86172	2.12712	3.53775e-11	5.16055e-11
PBX1	4.33418	2.52386	-1.81032	8.9564e-25	1.97877e-24
LAMTOR4	12.8009	9.41473	-3.38612	2.75702e-21	5.38993e-21
FYTTD1	4.47757	8.01497	3.5374	9.50404e-37	4.17183e-36
A2ML1	35.7446	13.3278	-22.4168	4.18743e-23	8.72342e-23
INSIG1	5.89972	7.01346	1.11374	7.66186e-05	9.17803e-05
ADAMTSL4	10.171	3.21242	-6.95859	1.06898e-36	4.66706e-36
SORBS2	5.7008	0.689793	-5.01101	2.15075e-40	1.7261e-39
GBP5	1.32457	3.30236	1.97779	3.29417e-07	4.2585e-07
TRMT44	4.1908	1.4983	-2.69249	5.86683e-41	6.12011e-40
PSKH1	3.93594	5.66952	1.73358	4.09588e-26	9.49799e-26
CFB	7.03796	1.45335	-5.5846	2.63026e-37	1.22193e-36
TNPO3	4.54996	7.26276	2.7128	3.22639e-39	1.93707e-38
NDUFA3	14.734	6.53109	-8.20294	5.22189e-40	3.70581e-39
SNORA52	1.0647	0.000652444	-1.06405	1.52796e-42	1.16112e-40
AC004057.1	40.4966	2.12816	-38.3684	2.39522e-41	3.856e-40
PI4K2A	4.27348	5.79532	1.52184	4.5335e-19	8.30436e-19
NREP	2.91704	4.0319	1.11486	1.07213e-08	1.45677e-08
PLCD4	2.35661	1.13079	-1.22582	1.43099e-29	3.88493e-29
RNASET2	6.13254	2.78439	-3.34814	8.92557e-37	3.92732e-36
RPS24	162.774	30.849	-131.925	4.05826e-41	4.94325e-40
MFN2	8.12657	12.1172	3.99061	1.25555e-26	2.97108e-26
RBMS2	2.56522	3.75865	1.19343	6.36151e-19	1.15872e-18
RPL9	54.967	32.6769	-22.2901	1.00164e-28	2.61092e-28
AC011558.1	7.8274	0.000652444	-7.82675	1.528e-42	1.16112e-40
ABHD5	5.99077	4.00956	-1.98121	2.06465e-20	3.93279e-20
KRT24	12.3989	3.20197	-9.19692	2.19981e-20	4.1859e-20
AKAP17A	6.96423	5.02279	-1.94144	8.20141e-26	1.8804e-25
SNRNP35	5.48584	2.38072	-3.10512	3.8393e-41	4.82113e-40
DCAF7	4.46914	9.1098	4.64066	3.9684e-42	1.3088e-40
RHOC	12.5429	8.66227	-3.88059	9.79169e-25	2.1594e-24
SERP1	9.90494	14.8306	4.92561	4.46394e-29	1.18186e-28
SNORD93	0.00800444	2.43131	2.4233	2.15044e-40	1.7261e-39
EHD4	4.54355	5.68515	1.1416	8.72522e-10	1.22432e-09
LINC01615	0.197735	2.13013	1.9324	6.6206e-22	1.32015e-21
EIF3H	21.3099	14.725	-6.58488	7.6549e-27	1.82955e-26
CENPE	1.15263	3.31282	2.16019	9.91062e-38	4.83732e-37
EIF2AK2	2.03473	7.36916	5.33443	2.29328e-42	1.16112e-40
PRICKLE3	4.58516	6.12342	1.53826	1.01244e-20	1.9481e-20
ENDOV	3.59688	1.535	-2.06188	1.35458e-40	1.16181e-39
KRT6A	469.698	548.327	78.6295	0.0246305	0.0268281
INTS4	4.43614	3.14609	-1.29005	3.39036e-28	8.58299e-28
MINDY1	6.24607	3.49157	-2.7545	1.52253e-31	4.56302e-31
ZDHHC20	5.37286	9.48582	4.11296	1.96916e-36	8.36626e-36
CAPN2	16.7659	13.0764	-3.68953	3.03269e-16	5.10811e-16
SLC43A2	1.78478	3.0506	1.26583	6.57252e-20	1.23145e-19
GPR68	2.57067	4.10758	1.5369	1.27542e-08	1.7283e-08
C9orf78	6.91648	5.686	-1.23048	4.7731e-16	8.00641e-16
BMP8A	0.224237	1.55424	1.33	1.70987e-31	5.11053e-31
SMARCD1	7.00484	8.34236	1.33752	8.05162e-11	1.16174e-10
ABCC1	5.18223	19.2824	14.1001	2.85646e-39	1.73121e-38
STAT1	5.34667	21.9809	16.6342	1.47727e-39	9.55879e-39
AC015813.2	1.8491	0.0205822	-1.82852	3.10799e-42	1.21521e-40
GANC	4.06242	2.04963	-2.01279	3.3997e-38	1.76276e-37
COQ8B	4.82657	3.50974	-1.31683	9.15644e-31	2.6308e-30
TSC2	8.26754	5.92538	-2.34216	1.07552e-32	3.4391e-32
STRIP1	4.45248	3.23965	-1.21283	1.78507e-35	6.9776e-35
METTL22	4.26855	1.80815	-2.4604	5.3543e-41	5.74538e-40
ZNF598	7.12405	9.29659	2.17254	5.45342e-21	1.0571e-20
AC099548.2	3.88164	0.26041	-3.62123	1.66719e-41	3.00789e-40
RNF185-AS1	1.36299	0.000652444	-1.36234	1.5281e-42	1.16112e-40
CDH11	1.60804	3.7053	2.09726	3.25754e-17	5.63187e-17
CMTM3	3.39163	5.13134	1.73971	1.76155e-11	2.59266e-11
ACAD8	4.73641	1.91212	-2.82429	2.8565e-39	1.73121e-38
ZNF528	2.93295	1.05734	-1.87561	4.67212e-34	1.62445e-33
NEK2	1.91726	4.58058	2.66333	5.53781e-38	2.78717e-37
NOMO3	3.79062	0.797851	-2.99276	4.17249e-41	4.99399e-40
PCBP1	22.435	31.4786	9.04358	1.58852e-28	4.09025e-28
CTHRC1	1.52535	11.5374	10.0121	2.84607e-40	2.1806e-39
TAF3	1.41463	3.42347	2.00883	2.41241e-42	1.18184e-40
FOXD1	0.808625	3.178	2.36937	5.23855e-23	1.0876e-22
C9orf16	10.4401	14.9384	4.49829	9.37147e-17	1.59957e-16
CRIP1	12.0357	0.90048	-11.1352	2.32824e-41	3.81278e-40
CASP4	9.85397	4.71504	-5.13893	2.30206e-36	9.74034e-36
LRRC41	7.26288	6.04578	-1.2171	1.35194e-22	2.76298e-22
FZD6	3.97909	15.3119	11.3328	1.60757e-42	1.16112e-40
POLR1D	15.2164	7.26711	-7.94926	3.24604e-41	4.42545e-40
ATF6B	9.76416	11.0276	1.26342	1.39008e-05	1.70494e-05
RAN	30.9712	19.9038	-11.0674	2.79378e-30	7.82244e-30
TENT5B	11.3437	5.75198	-5.59171	5.05357e-22	1.01226e-21
PRMT1	12.9469	9.42762	-3.5193	8.72328e-24	1.86138e-23
EFHC1	2.87096	1.83189	-1.03906	8.04285e-27	1.9206e-26
PTS	6.40636	3.53241	-2.87395	3.53823e-38	1.8262e-37
ABCF2	4.88123	8.005	3.12377	3.79183e-36	1.56679e-35
FNBP4	9.44073	5.86724	-3.57349	6.99347e-37	3.10203e-36
SLC39A10	1.91349	3.62035	1.70686	5.50698e-36	2.24445e-35
IQANK1	7.51816	9.89165	2.37349	2.5687e-07	3.33085e-07
RPL37AP1	0.274245	3.81836	3.54412	5.89478e-42	1.42034e-40
RAC2	3.97187	8.87344	4.90157	5.75739e-25	1.27999e-24
TNFAIP3	3.36651	10.2988	6.93231	4.04771e-34	1.42038e-33
SRFBP1	1.85059	3.18956	1.33897	1.5344e-37	7.35213e-37
SHISA4	2.28748	3.41449	1.12701	1.20187e-09	1.67916e-09
ZFHX3	1.00623	3.43261	2.42638	2.52718e-38	1.33491e-37
ZNF862	2.72716	1.3996	-1.32756	2.63918e-31	7.80739e-31
PBK	2.32963	6.05456	3.72493	5.49339e-38	2.76735e-37
ECE1	5.26863	11.8183	6.54968	6.22236e-34	2.1458e-33
MAIP1	3.49553	4.83326	1.33773	1.79154e-30	5.07051e-30
IGKV1-12	0.491038	2.4367	1.94566	2.30772e-11	3.38608e-11
NSMCE1	7.40263	5.48589	-1.91674	7.25141e-25	1.60692e-24
NUTM2A-AS1	4.70586	2.00411	-2.70175	3.14118e-40	2.3736e-39
SLC30A7	1.99321	4.44795	2.45474	3.325e-42	1.25096e-40
SLC36A1	2.05988	3.60462	1.54474	2.20856e-29	5.94596e-29
PRPF19	9.97147	14.9674	4.99588	4.59609e-31	1.34266e-30
AC026362.1	1.34199	0.0293994	-1.31259	8.97064e-42	1.86667e-40
PXDN	2.02768	6.47762	4.44994	5.42376e-29	1.43075e-28
ZNF23	2.2167	0.125616	-2.09108	2.66095e-41	4.07214e-40
FOXL1	0.240125	1.39151	1.15139	1.51682e-21	2.9909e-21
ECM1	66.7678	16.2887	-50.4791	5.24028e-24	1.12583e-23
SCYL2	4.23586	6.49587	2.26001	1.12542e-37	5.47609e-37
TUBA1C	35.4099	20.7648	-14.6451	6.7694e-28	1.68805e-27
OARD1	6.23418	2.17382	-4.06036	4.42773e-42	1.34399e-40
LY86	0.795546	2.03414	1.2386	4.23393e-18	7.50535e-18
LCAT	4.5403	2.8423	-1.698	5.08479e-22	1.01798e-21
LARP4B	5.92615	4.51201	-1.41414	1.40845e-25	3.19591e-25
AC015688.6	3.94906	0.000652444	-3.9484	1.52811e-42	1.16112e-40
GASK1A	1.35631	0.256828	-1.09948	6.38496e-35	2.37726e-34
SPNS1	5.34874	1.39808	-3.95066	4.3857e-41	5.15945e-40
HLA-DRB6	0.947131	3.23589	2.28876	4.63554e-19	8.48563e-19
CORO1C	7.71294	11.7936	4.08062	9.00667e-27	2.14702e-26
RNU7-45P	0.00335397	2.27208	2.26873	1.47112e-40	1.2454e-39
MMP11	0.809869	12.5956	11.7857	4.42817e-42	1.34399e-40
NFASC	3.42951	1.50818	-1.92132	1.70166e-33	5.68791e-33
APEX2	3.87985	6.97162	3.09177	1.07868e-41	2.13568e-40
TMEM214	7.83991	10.3836	2.54373	3.11846e-30	8.70269e-30
RPS19P1	0.167	1.73377	1.56677	2.25215e-41	3.75483e-40
FALEC	2.21095	0.416016	-1.79494	3.53257e-28	8.9347e-28
RNA5SP216	4.47094	0.000652444	-4.47029	1.52808e-42	1.16112e-40
ZBTB33	2.50063	6.35418	3.85355	2.17981e-42	1.16112e-40
POMT1	4.87807	2.70548	-2.17259	4.93957e-36	2.02428e-35
TIMM50	7.24665	4.58336	-2.66329	4.95895e-39	2.8922e-38
NPNT	3.17023	4.81892	1.64869	3.19887e-07	4.13729e-07
TMEM164	3.70783	4.97625	1.26842	3.75645e-23	7.83598e-23
BMP7	5.48669	8.55312	3.06643	3.29695e-05	3.99954e-05
MTATP8P2	0.0238807	3.6744	3.65052	4.35367e-42	1.34399e-40
ACAP1	3.18889	1.41061	-1.77828	9.06432e-34	3.09189e-33
SRXN1	8.02061	3.35885	-4.66175	4.67375e-28	1.17561e-27
RBM4	11.5109	2.15029	-9.36063	4.6838e-41	5.34313e-40
AL355574.1	0.134058	2.18604	2.05199	1.8099e-42	1.16112e-40
DENND2C	5.18817	3.60158	-1.58659	3.50126e-13	5.40589e-13
MOB1A	6.21724	13.8724	7.65519	1.80954e-42	1.16112e-40
ZFP28	1.45815	0.451842	-1.0063	5.91279e-31	1.7159e-30
MUC1	19.1424	6.38809	-12.7543	8.58193e-31	2.46896e-30
EPB41L4B	0.935277	2.44813	1.51285	3.25368e-26	7.57871e-26
IGLV2-14	5.97984	14.5037	8.52384	1.41446e-06	1.7902e-06
LRPAP1	8.32344	4.74806	-3.57538	2.19173e-37	1.02864e-36
PTPRCAP	2.30797	0.000652444	-2.30732	1.52802e-42	1.16112e-40
BRCA2	0.837759	2.01877	1.18101	4.66456e-31	1.36193e-30
VIPR1	2.83665	1.501	-1.33564	2.12646e-21	4.17283e-21
SPTSSA	5.12893	11.8781	6.74921	2.46768e-39	1.52326e-38
CNIH2	0.828775	2.04859	1.21981	6.94542e-22	1.38371e-21
FURIN	6.01154	14.6165	8.60499	4.49968e-39	2.64374e-38
RPL34P27	0.317747	2.29654	1.9788	1.93781e-41	3.37961e-40
FPR3	0.775407	3.27144	2.49603	3.08107e-37	1.42057e-36
BCS1L	7.88009	3.71478	-4.16531	1.35448e-40	1.16181e-39
AC009506.1	1.26566	0.185974	-1.07968	7.34004e-41	7.1499e-40
SLBP	6.19798	11.4648	5.26678	1.93774e-41	3.37961e-40
GNL3	11.3278	7.94463	-3.38314	9.12589e-30	2.49605e-29
FKTN	1.70361	3.01972	1.31611	6.67278e-37	2.96697e-36
XXYLT1	3.24676	5.04915	1.80239	4.8901e-26	1.1292e-25
SNORA72	1.85776	0.000652444	-1.85711	1.52811e-42	1.16112e-40
GTPBP2	10.0654	6.80309	-3.26228	1.26106e-28	3.26748e-28
RNASEH2B	4.19935	2.45065	-1.7487	3.55162e-37	1.62327e-36
STRN4	9.24974	7.72332	-1.52642	1.36904e-20	2.6237e-20
KLF16	3.73181	7.73752	4.00571	6.68516e-40	4.63114e-39
TSPAN3	9.63883	6.7858	-2.85303	2.53916e-29	6.82097e-29
ADNP2	2.71959	4.73835	2.01876	2.65502e-39	1.62602e-38
SLC9A7	1.36021	2.56112	1.20091	2.84496e-23	5.95881e-23
NLRP1	5.44746	3.18461	-2.26285	1.04402e-24	2.29826e-24
ZNF662	2.36784	0.421054	-1.94678	3.30034e-40	2.47177e-39
ZCCHC8	4.55554	2.83986	-1.71568	1.36088e-38	7.42428e-38
GLYCTK	2.36678	0.833782	-1.533	8.83054e-40	5.97421e-39
FAM166B	4.76617	0.225499	-4.54067	3.67026e-33	1.20445e-32
SLC25A5	28.6177	59.2852	30.6674	1.26612e-36	5.50272e-36
ADAM8	1.9719	4.01294	2.04104	3.31462e-13	5.1206e-13
FAM95B1	3.05806	0.00493708	-3.05313	1.55423e-42	1.16112e-40
KLHL9	2.47712	4.11406	1.63694	3.2312e-30	9.00361e-30
ENO1	49.1099	87.8436	38.7337	1.71823e-25	3.88921e-25
LNPK	2.67844	4.49189	1.81345	3.45918e-35	1.31698e-34
HMGCS2	1.61553	0.299621	-1.31591	2.07768e-26	4.86934e-26
KMT2E	4.38286	7.02804	2.64517	2.31713e-31	6.88248e-31
ASAP3	5.92254	3.49389	-2.42865	2.33118e-30	6.55391e-30
MFHAS1	1.6294	6.6445	5.0151	8.11114e-42	1.7474e-40
NMRK1	8.03911	3.63259	-4.40651	3.31905e-38	1.72581e-37
AC021443.1	0.0806042	3.25479	3.17419	2.80829e-42	1.2068e-40
LINC01001	6.57028	0.734182	-5.8361	5.62834e-41	5.95747e-40
GANAB	11.6718	30.0557	18.3839	2.68983e-42	1.20298e-40
AL627309.7	6.37025	8.46306	2.0928	0.000899987	0.00103922
MORC2	4.25849	5.61994	1.36145	1.46275e-26	3.45321e-26
CLMP	2.45652	3.67239	1.21587	1.02363e-06	1.30411e-06
ARNTL	3.83393	2.3603	-1.47363	6.28387e-27	1.50678e-26
EPHA7	0.243865	1.60493	1.36107	5.25277e-05	6.32601e-05
SRRM2	39.4467	24.9371	-14.5096	3.50397e-31	1.02936e-30
SENP1	2.13378	4.17442	2.04064	2.29317e-42	1.16112e-40
MTMR12	3.30592	5.86462	2.5587	9.70045e-39	5.43215e-38
IFITM1	15.3867	26.1396	10.7529	8.08505e-08	1.06652e-07
LGALS8	9.58634	5.08385	-4.50249	1.05301e-19	1.96091e-19
IRF2BPL	3.5396	10.8566	7.31704	3.61737e-42	1.28321e-40
PC	4.60622	6.5013	1.89508	2.25158e-07	2.92862e-07
AC022415.1	1.04665	0.0361005	-1.01055	1.43414e-41	2.70273e-40
FKBP10	4.12212	6.9542	2.83209	1.02645e-08	1.3954e-08
NEMP1	2.14278	4.99504	2.85226	2.25195e-41	3.75483e-40
FOXN3	4.05843	5.28626	1.22784	1.6179e-13	2.51854e-13
TIAF1	1.84138	0.839368	-1.00202	1.42777e-28	3.68769e-28
TRNP1	9.93433	4.57954	-5.35479	1.72629e-26	4.05987e-26
AC104794.4	1.44268	0.0980215	-1.34466	4.11221e-30	1.14122e-29
ADAMTS12	0.406191	2.79951	2.39332	3.5692e-32	1.10495e-31
NDUFA9	9.91278	2.81195	-7.10082	4.53333e-41	5.26093e-40
RRP9	4.12681	5.53754	1.41073	1.05939e-15	1.75534e-15
CBX1	6.17237	8.93897	2.7666	1.01718e-25	2.32393e-25
PLOD3	4.19726	7.43984	3.24258	5.33517e-22	1.06752e-21
RNU4-89P	0.172096	1.91191	1.73981	7.79836e-34	2.67501e-33
ILF3	12.317	10.7938	-1.52322	5.56477e-13	8.5439e-13
CAMKK2	4.22936	5.29653	1.06717	2.46504e-21	4.82513e-21
PLAGL2	3.3103	6.8924	3.5821	5.83082e-39	3.35964e-38
MIGA2	6.60016	3.11142	-3.48874	1.44713e-40	1.22777e-39
RRAGD	5.66554	2.59288	-3.07267	2.79613e-31	8.25391e-31
BPTFP1	4.61824	0.00613749	-4.6121	1.84088e-42	1.16112e-40
ATRIP	2.24109	0.131955	-2.10913	1.65304e-41	2.99702e-40
S100A6	54.8652	111.12	56.2545	3.52068e-26	8.18487e-26
AC004967.1	0.831958	5.45809	4.62614	2.62534e-42	1.19687e-40
SNORA50C	1.53346	0.000652444	-1.53281	1.52808e-42	1.16112e-40
LIPE	2.92043	1.5747	-1.34574	4.4866e-24	9.66175e-24
HGS	14.9849	7.97491	-7.00998	7.83789e-41	7.47454e-40
ATP10A	5.62773	0.926756	-4.70098	0.0103294	0.0114427
TMPRSS4	15.9607	6.31954	-9.64118	1.77914e-33	5.94187e-33
AC091042.1	0.536779	1.93865	1.40187	9.32015e-23	1.91439e-22
SMIM10L1	1.80988	3.5597	1.74981	1.11057e-40	9.92175e-40
PPIH	6.33057	7.96308	1.63251	3.30057e-10	4.68458e-10
TBX1	1.60266	3.58368	1.98102	7.24172e-10	1.01836e-09
P2RX2	1.88074	0.0451481	-1.83559	4.68807e-41	5.34313e-40
FTH1P16	0.526172	2.76079	2.23461	8.95618e-41	8.28994e-40
PPFIBP2	6.60452	2.62331	-3.98121	3.41552e-39	2.04058e-38
F11R	10.9266	13.8157	2.88903	3.06897e-11	4.48746e-11
SDR39U1	8.48091	1.53206	-6.94885	3.83874e-41	4.82113e-40
TJP2	8.41772	6.38668	-2.03104	1.26059e-12	1.91909e-12
SLC7A1	8.12316	12.0078	3.88463	9.30485e-14	1.45775e-13
NUP210	2.48536	6.42265	3.93729	1.05092e-25	2.39902e-25
DLGAP5	1.96215	5.54455	3.5824	5.08138e-39	2.95862e-38
MOB3A	4.74766	9.80911	5.06144	5.31405e-40	3.76217e-39
ZDHHC1	2.84602	4.12866	1.28264	8.63518e-15	1.39501e-14
FUS	19.0502	9.37617	-9.67403	4.73212e-40	3.39992e-39
SHROOM2	1.97848	3.26901	1.29054	8.35456e-21	1.61123e-20
IFITM2	22.009	11.3948	-10.6142	1.39301e-23	2.95349e-23
CSNK1E	13.0513	8.74195	-4.30931	1.01499e-26	2.41379e-26
AL133353.1	0.461786	1.63577	1.17398	2.02348e-26	4.74437e-26
ODF2L	4.87324	2.42568	-2.44755	2.5083e-37	1.16923e-36
LANCL2	2.81252	4.98096	2.16844	1.17043e-23	2.48829e-23
CRIM1	3.73005	6.16344	2.43339	1.39655e-26	3.30047e-26
IL17RC	7.26642	3.64552	-3.6209	2.13143e-39	1.32923e-38
PTPN18	6.42914	4.77131	-1.65782	9.22418e-26	2.10962e-25
PDIA4	7.00769	20.3741	13.3664	3.71366e-41	4.75006e-40
PPFIA3	4.17289	2.77662	-1.39627	2.30363e-20	4.37896e-20
ESYT1	7.13444	9.92241	2.78797	2.08891e-21	4.10155e-21
IGKV1-33	4.17456	1.09957	-3.07499	4.85792e-20	9.13313e-20
IGKV3-20	7.28176	34.9662	27.6844	2.49343e-12	3.75742e-12
TCF7L1	2.90841	4.72912	1.82071	2.82539e-15	4.63045e-15
FHIT	2.09562	0.489782	-1.60583	2.37306e-37	1.1077e-36
BMS1P11	1.10181	0.00417176	-1.09764	2.3324e-38	1.23618e-37
RAB3GAP2	2.9418	4.50065	1.55885	6.90736e-40	4.77603e-39
SVIL-AS1	4.40506	2.28596	-2.1191	2.57017e-39	1.57756e-38
ATP5PB	21.7613	12.6475	-9.11376	7.66112e-37	3.39406e-36
CTSC	8.05792	11.0694	3.01152	8.49131e-05	0.00010155
MIR3176	0.0134406	2.54459	2.53115	4.13913e-42	1.3369e-40
HOXA1	1.39123	2.44076	1.04953	3.34451e-17	5.77951e-17
MTIF2	4.34869	6.18894	1.84025	3.89754e-34	1.36987e-33
TEPSIN	6.32101	2.7577	-3.56332	8.10714e-41	7.64696e-40
EGFL8	5.95907	0.491041	-5.46803	2.21494e-41	3.72103e-40
DDT	12.9099	4.66234	-8.24756	5.52984e-41	5.8874e-40
AC011462.2	5.91387	0.000652444	-5.91322	1.52796e-42	1.16112e-40
SMG6	4.93002	2.92294	-2.00708	1.24458e-39	8.19332e-39
CUL1	5.42185	9.13802	3.71617	3.07288e-39	1.84615e-38
TRNT1	3.11507	2.09228	-1.02279	9.28203e-35	3.41561e-34
SPCS1	13.0683	5.4022	-7.66609	2.79415e-41	4.13706e-40
RPS27AP11	0.393484	1.72502	1.33153	2.46783e-39	1.52326e-38
SIRT2	7.66171	4.89923	-2.76248	1.08301e-39	7.23026e-39
TOR1A	3.99044	5.46161	1.47117	1.39124e-29	3.77982e-29
ITIH5	2.7727	0.821055	-1.95164	2.06345e-34	7.39436e-34
SMURF1	4.70254	7.92934	3.2268	9.55271e-34	3.25144e-33
GORASP2	7.9249	10.1726	2.24772	3.27159e-21	6.38341e-21
CBWD3	4.7228	0.141839	-4.58096	2.89253e-41	4.19275e-40
RELB	2.90148	6.0727	3.17122	9.21035e-33	2.95457e-32
RACGAP1	4.27771	7.40141	3.1237	4.46524e-34	1.55655e-33
DNLZ	2.91015	0.0333866	-2.87676	7.58486e-42	1.67339e-40
MYOC	2.44135	0.764478	-1.67687	1.33718e-25	3.04048e-25
ADAD2	2.18731	0.440055	-1.74725	2.30233e-36	9.74034e-36
TRA2A	10.6015	6.54294	-4.05857	2.6906e-36	1.13046e-35
PRRX2	1.98501	5.57674	3.59173	6.37331e-30	1.75762e-29
MIDN	11.4074	12.8101	1.40268	3.77649e-06	4.71076e-06
TTK	1.97614	4.2085	2.23236	9.11623e-36	3.64749e-35
RPL14	52.1637	12.4778	-39.6859	2.27303e-41	3.77818e-40
AC046143.1	0.697632	1.72506	1.02743	1.38133e-25	3.13827e-25
PFDN2	9.68969	19.1342	9.44449	1.16527e-36	5.07288e-36
ZBTB11	2.62879	4.36392	1.73513	4.49901e-36	1.84756e-35
USP14	5.26806	8.93908	3.67102	1.51383e-39	9.76655e-39
IGLV3-1	2.98654	5.14742	2.16088	0.00111058	0.00127823
ARL17B	1.56042	0.300804	-1.25961	1.00655e-39	6.75158e-39
BCL2L2	7.02342	5.92708	-1.09634	1.68196e-14	2.69422e-14
IGLV3-21	2.17811	10.5512	8.37314	2.81815e-18	5.02892e-18
MMP15	1.91642	4.96917	3.05276	2.94291e-38	1.54208e-37
AC106795.2	2.18642	0.568632	-1.61779	1.50666e-35	5.92472e-35
IPO4	4.79498	1.41264	-3.38234	2.5737e-41	3.98871e-40
CISH	2.89193	1.85316	-1.03876	2.02343e-24	4.40662e-24
UBE2Q2P2	3.81198	1.97185	-1.84013	1.84009e-27	4.50771e-27
UBE4A	3.50184	4.5047	1.00286	1.54639e-19	2.869e-19
PTPN14	2.19455	4.33377	2.13922	1.09219e-39	7.26903e-39
VASP	7.68099	10.144	2.463	2.39316e-21	4.68692e-21
BSCL2	5.98402	1.52347	-4.46055	7.71458e-41	7.39016e-40
NPW	0.48332	4.45224	3.96892	1.12076e-36	4.8864e-36
EXOC2	3.2548	4.56616	1.31137	3.58089e-28	9.05274e-28
MYEOV	5.57188	3.03408	-2.53781	4.17146e-17	7.18931e-17
PCBP1-AS1	5.63	0.797219	-4.83278	2.89261e-41	4.19275e-40
USHBP1	1.35004	0.19301	-1.15703	3.11544e-40	2.35739e-39
PROCR	3.14603	6.60958	3.46355	1.02392e-25	2.33883e-25
RASSF7	7.36299	4.87011	-2.49288	2.11963e-25	4.78595e-25
ZCCHC7	2.65255	3.75953	1.10698	2.96212e-31	8.73217e-31
GYPC	5.19939	2.51717	-2.68222	2.44053e-28	6.23003e-28
REC8	3.53211	2.48149	-1.05062	6.21807e-14	9.78626e-14
RUNDC1	2.45176	3.8739	1.42214	8.32015e-39	4.69864e-38
HIPK1	4.45382	5.7311	1.27728	3.32971e-13	5.14319e-13
SNORA5A	0.591576	1.63038	1.03881	1.13613e-18	2.05137e-18
GOLGA6L10	2.5108	0.253685	-2.25711	1.18524e-39	7.84001e-39
CC2D1B	4.99383	3.65957	-1.33426	1.03759e-33	3.51655e-33
DYNLL2	4.46808	5.52181	1.05373	1.20619e-14	1.93734e-14
AL109811.2	3.43282	1.36202	-2.0708	5.71749e-38	2.86981e-37
AC090114.1	0.30862	3.01674	2.70811	5.60496e-42	1.39011e-40
IFFO2	5.84889	8.64928	2.80039	1.86521e-09	2.59209e-09
TRMT112	17.8751	16.6347	-1.24035	6.64442e-05	7.9749e-05
PPP1R14A	7.5342	2.99449	-4.53971	3.91271e-29	1.03913e-28
LDHB	16.8322	25.7472	8.91501	3.76798e-14	5.9618e-14
SP110	3.26529	1.63776	-1.62753	1.97624e-31	5.89254e-31
COMMD4	8.19007	3.88622	-4.30385	6.6434e-41	6.63731e-40
TEN1-CDK3	1.63909	0.413951	-1.22514	1.2065e-40	1.05624e-39
KCMF1	7.69667	5.89066	-1.80601	1.82604e-16	3.0918e-16
MPC1	7.67156	6.23516	-1.4364	1.61235e-15	2.65829e-15
HLA-H	2.89976	6.09499	3.19523	5.19935e-17	8.93559e-17
LCE3A	0.548433	1.85338	1.30495	0.000246622	0.000290796
AP002807.1	2.71006	1.17134	-1.53872	1.54009e-28	3.96848e-28
SLC20A2	6.27488	10.2761	4.00119	1.08473e-10	1.55932e-10
POLR2E	15.0326	9.03361	-5.99897	8.89585e-40	6.01469e-39
GNPDA1	3.60056	5.41589	1.81533	1.31084e-36	5.69031e-36
IQSEC1	2.90346	4.54604	1.64258	1.67461e-32	5.29619e-32
RNU4-2	1.41735	3.99044	2.57309	1.35045e-13	2.10579e-13
RPL32	83.6238	29.9083	-53.7154	4.67771e-41	5.34313e-40
F10	2.02046	0.374864	-1.6456	4.22329e-40	3.07497e-39
AL591846.2	0.0823177	4.16882	4.0865	5.15219e-42	1.38094e-40
NTF4	3.1918	1.28186	-1.90995	2.32969e-34	8.324e-34
NDRG3	4.23321	7.31454	3.08133	4.39549e-37	1.98901e-36
TYMP	11.3327	25.0538	13.7211	3.05382e-20	5.78489e-20
SMIM22	3.06666	1.95508	-1.11158	3.35925e-09	4.63495e-09
KIFAP3	3.46367	4.81873	1.35506	2.20729e-27	5.38803e-27
SNX15	3.92153	0.203017	-3.71852	2.99038e-41	4.2616e-40
ITPR1	3.28516	1.71675	-1.56842	1.64632e-29	4.45411e-29
AHCTF1	3.65202	5.92374	2.27172	1.53313e-36	6.58544e-36
PML	6.506	7.97407	1.46807	1.80926e-07	2.36058e-07
DPP3	5.64224	7.90235	2.26011	2.2035e-25	4.97133e-25
TRMT2A	7.90751	3.77284	-4.13467	8.10665e-41	7.64696e-40
TRMT5	1.87703	3.21878	1.34175	1.04781e-37	5.10749e-37
CSNK2B	17.5969	8.56343	-9.03344	4.59443e-41	5.29333e-40
GRINA	15.6312	26.475	10.8438	2.50107e-30	7.02436e-30
ASF1A	2.68015	5.48159	2.80144	1.55922e-41	2.87951e-40
CD248	4.44572	7.15206	2.70634	1.22042e-10	1.75209e-10
AFAP1L2	3.51532	5.27335	1.75802	8.64048e-07	1.1031e-06
KRT16P2	4.17563	1.9429	-2.23272	2.67308e-13	4.14175e-13
AC113935.1	5.34731	3.58963	-1.75768	4.33289e-20	8.16141e-20
PBDC1	5.81195	7.77243	1.96048	1.84941e-17	3.2202e-17
SNX7	3.9148	5.27659	1.36179	2.49775e-16	4.21484e-16
AC234582.1	1.92044	0.668318	-1.25213	4.42718e-39	2.60405e-38
KIAA1211L	3.22972	1.74457	-1.48515	3.2624e-19	6.00905e-19
FAM83H	9.18619	24.0611	14.8749	7.68577e-36	3.09204e-35
TNPO1	4.17246	6.28301	2.11055	2.11026e-30	5.94957e-30
SLC35F6	4.87858	8.69685	3.81827	1.93182e-40	1.56766e-39
TMEM126B	19.8243	4.53619	-15.2882	2.12123e-11	3.11577e-11
YIF1A	8.34981	10.0188	1.66902	1.79852e-10	2.57014e-10
EHMT1	6.08841	3.76235	-2.32606	1.16716e-40	1.03343e-39
IQCE	1.81091	2.97956	1.16865	2.34638e-33	7.77903e-33
RPL23AP42	46.4507	6.59892	-39.8518	2.13723e-41	3.64339e-40
AC026356.1	0.276848	1.47804	1.20119	2.79767e-41	4.13706e-40
FBP1	1.33067	3.41715	2.08647	3.34284e-16	5.62619e-16
TNFRSF14	9.74345	2.81542	-6.92802	7.10034e-41	6.97844e-40
TAOK1	2.77717	4.91281	2.13564	2.83322e-39	1.72076e-38
ATP2B4	5.60682	11.0604	5.45355	1.38159e-29	3.75472e-29
BRMS1L	2.30445	3.37115	1.0667	2.26582e-22	4.59902e-22
WASH9P	5.43361	1.9303	-3.50331	5.31436e-40	3.76217e-39
BICDL2	14.1097	3.37041	-10.7393	1.9457e-37	9.19856e-37
AGAP4	3.48408	1.04675	-2.43732	4.17244e-41	4.99399e-40
MIR1-1HG-AS1	1.16166	0.0926843	-1.06897	2.5484e-37	1.18691e-36
CRNN	268.896	30.6912	-238.205	2.30335e-30	6.47734e-30
KPNA6	4.23323	7.99855	3.76532	6.41091e-42	1.49241e-40
AC027763.1	0.302285	2.00832	1.70604	4.55949e-35	1.72385e-34
CSNK1G1	2.25845	3.48099	1.22254	1.17571e-29	3.20376e-29
MOCS2	5.00473	3.16578	-1.83896	1.04064e-34	3.82008e-34
NEFL	0.923386	5.19485	4.27146	1.4955e-13	2.32966e-13
EP400P1	2.6304	1.04224	-1.58816	6.05941e-40	4.23239e-39
FAM156A	4.33036	0.0129665	-4.31739	1.63508e-42	1.16112e-40
ZNF75A	3.56492	2.02047	-1.54445	1.68095e-34	6.06124e-34
AC020656.1	2.16341	0.000652444	-2.16276	1.52811e-42	1.16112e-40
CYBRD1	5.72109	7.42129	1.7002	0.00887118	0.00985817
AC069257.2	0.329598	1.37136	1.04176	5.61126e-25	1.24831e-24
TMSB4XP1	0.430062	1.90102	1.47096	6.69724e-26	1.54164e-25
CDC37	18.0009	13.9985	-4.00238	1.16239e-24	2.55577e-24
CCN5	5.27885	0.729403	-4.54944	2.35442e-37	1.09983e-36
KATNAL1	1.22134	2.23779	1.01645	2.40106e-24	5.22075e-24
N4BP2L1	3.45303	1.50957	-1.94346	3.24507e-36	1.34898e-35
LAMP5	0.174756	1.60393	1.42918	3.67914e-27	8.88607e-27
TMPRSS11GP	1.59359	0.338432	-1.25516	8.21374e-30	2.25442e-29
PRRT3-AS1	1.00992	2.10816	1.09824	1.00003e-21	1.98364e-21
EML4	3.66978	6.35273	2.68295	1.73814e-41	3.12552e-40
ATP11B	6.33373	9.84265	3.50892	4.71007e-21	9.14141e-21
ANO6	3.03873	6.34293	3.30419	4.50991e-40	3.26204e-39
PITX1	38.3994	23.9447	-14.4548	1.16153e-15	1.92137e-15
RHBDF1	8.90205	4.80213	-4.09993	1.53541e-38	8.31553e-38
FABP5	146.587	66.8848	-79.7019	1.78987e-20	3.41827e-20
ALS2CL	16.9665	3.61418	-13.3524	9.42085e-40	6.35401e-39
SELENOK	7.94283	6.48336	-1.45946	1.32511e-18	2.38672e-18
IFIT5	1.68844	3.92185	2.23341	4.82563e-36	1.97907e-35
COASY	9.64366	8.2158	-1.42786	9.79474e-15	1.57932e-14
SUMO2P1	1.01522	2.65547	1.64025	8.53557e-34	2.91969e-33
APP	12.9755	37.0515	24.0761	9.46564e-39	5.31054e-38
ISY1-RAB43	2.25088	0.00372608	-2.24715	1.47709e-42	1.16112e-40
IFT52	3.41511	4.93758	1.52247	3.83136e-29	1.01851e-28
NRBP2	6.24393	4.89318	-1.35075	1.87161e-12	2.83413e-12
GPAA1	10.0323	13.0698	3.03747	1.3726e-17	2.39948e-17
NPIPB15	3.19408	1.82826	-1.36581	1.15687e-08	1.57017e-08
SMARCA5	4.17018	7.36015	3.18998	5.79584e-42	1.41517e-40
FBXO33	1.97542	3.93627	1.96085	5.91524e-41	6.12011e-40
IPMK	1.80375	3.34128	1.53753	6.44487e-31	1.8644e-30
UBTD2	2.64813	5.46698	2.81885	1.66296e-42	1.16112e-40
UGGT1	2.82032	6.45612	3.6358	2.90504e-42	1.2068e-40
IGKV2D-29	0.91179	2.86158	1.94979	1.92593e-05	2.35348e-05
ZKSCAN8	2.10374	4.03032	1.92658	1.07736e-38	5.99641e-38
GTF2E1	1.85457	3.70147	1.8469	6.65311e-38	3.31659e-37
POLR2H	10.3404	7.62862	-2.71178	2.44654e-24	5.31735e-24
TBC1D9	2.36587	4.07611	1.71024	1.69304e-29	4.57712e-29
SSX2IP	1.87022	3.08608	1.21586	1.70841e-27	4.18886e-27
HSPA5	14.5429	51.5192	36.9764	6.85361e-42	1.55999e-40
SCGB3A1	6.45605	2.14463	-4.31142	2.81627e-09	3.89555e-09
POLR2K	6.26342	11.3973	5.13391	4.97627e-40	3.55259e-39
LTA4H	12.715	6.69645	-6.0185	2.87168e-38	1.5089e-37
RER1	15.8225	5.94888	-9.87363	3.30101e-41	4.44477e-40
CIAO3	5.60113	2.28843	-3.3127	2.89236e-41	4.19275e-40
TP63	8.97216	31.981	23.0088	1.01186e-36	4.42919e-36
AP001453.1	1.30212	0.0284563	-1.27367	6.19943e-42	1.45865e-40
MLPH	3.79689	1.10923	-2.68766	4.34543e-26	1.00598e-25
PPP6R2	7.49053	6.05504	-1.43549	3.46661e-23	7.24237e-23
PLAC8	10.1885	2.13582	-8.05264	4.63071e-31	1.35241e-30
CIRBP	23.3089	6.55855	-16.7504	2.44407e-41	3.87584e-40
CEP170B	6.20927	10.9315	4.72225	1.93378e-29	5.21656e-29
YIPF2	7.54522	6.14285	-1.40237	6.83614e-19	1.24434e-18
USP2	2.30866	1.05177	-1.25689	1.91534e-19	3.54571e-19
TEAD4	2.65009	6.09555	3.44546	4.95941e-39	2.8922e-38
ADGRL1	3.02257	5.3233	2.30073	1.77271e-26	4.16794e-26
CDR2L	2.3655	5.16809	2.80258	2.71465e-37	1.25901e-36
TRRAP	2.44282	6.22926	3.78644	1.93626e-42	1.16112e-40
EIF3D	17.5234	16.298	-1.22536	5.46694e-07	7.026e-07
ZBTB21	1.72184	3.04025	1.31842	3.53519e-36	1.46405e-35
TFCP2L1	3.32693	4.59315	1.26622	0.018304	0.0200445
HIGD1A	13.8066	11.4726	-2.33401	2.19357e-11	3.2203e-11
TMCO6	4.40189	2.92502	-1.47687	1.04867e-34	3.84701e-34
SKP1	27.9399	6.44271	-21.4972	3.22639e-41	4.42545e-40
SUOX	4.69741	2.34679	-2.35062	4.4365e-40	3.2111e-39
CXCL9	0.745284	9.68637	8.94108	4.39868e-34	1.53472e-33
DPY19L1	1.83435	4.9423	3.10795	1.33229e-40	1.14629e-39
HLA-F	8.32713	6.50206	-1.82507	2.94735e-06	3.68612e-06
LGALS2	0.635294	1.67309	1.0378	6.87811e-24	1.47338e-23
TBC1D17	6.5536	5.42758	-1.12602	4.09824e-16	6.88176e-16
ZNF148	2.07318	4.69413	2.62096	1.5206e-40	1.27548e-39
IGLC2	25.0858	42.1591	17.0733	0.0021063	0.00239887
TRIM7	6.81989	3.07931	-3.74058	1.66374e-33	5.56624e-33
PLK2	8.35469	6.22986	-2.12483	2.35669e-11	3.457e-11
LONP1	5.94413	7.6731	1.72898	1.22637e-20	2.3552e-20
SMG8	2.21489	3.53193	1.31703	7.0191e-34	2.41376e-33
CACNA2D1	0.923498	2.32831	1.40482	2.02763e-09	2.8139e-09
PTPRZ1	3.91771	6.0543	2.1366	2.53256e-08	3.39746e-08
SLC27A3	5.11777	3.17709	-1.94068	5.42445e-31	1.57793e-30
RPL23AP2	0.718179	2.02776	1.30958	4.57243e-37	2.06398e-36
ITGA10	1.47268	0.26346	-1.20922	2.99939e-39	1.80772e-38
PXYLP1	1.161	2.29938	1.13838	3.083e-23	6.45199e-23
LEAP2	1.5873	0.38042	-1.20688	1.76443e-40	1.45212e-39
BCL2L2-PABPN1	2.06333	0.483404	-1.57993	9.77136e-34	3.31966e-33
NFKBIE	2.18897	3.75475	1.56578	2.14871e-27	5.24736e-27
SENP6	5.84207	4.34266	-1.49941	1.21954e-32	3.88379e-32
HINT2	5.84097	3.68513	-2.15584	5.353e-27	1.28498e-26
APMAP	5.31801	14.5586	9.24057	2.49519e-42	1.18184e-40
CTNNAL1	4.2065	5.23666	1.03016	0.000356665	0.000417592
COX6CP1	0.329677	1.35057	1.02089	9.06474e-30	2.47994e-29
TSEN2	3.28435	1.58903	-1.69532	5.91228e-40	4.15069e-39
ZSCAN5A	1.92565	0.815159	-1.11049	2.20198e-39	1.36776e-38
ANKRD6	2.52256	1.12941	-1.39315	3.13835e-31	9.24723e-31
GNAI1	4.50609	6.53297	2.02688	2.58302e-18	4.61617e-18
ARL2	9.33928	7.79649	-1.54279	2.90668e-11	4.25242e-11
TTC33	1.88449	3.27832	1.39383	4.08678e-38	2.0895e-37
AL162151.2	31.5019	6.70491	-24.797	9.55632e-27	2.27509e-26
STIM1	9.23366	7.01526	-2.2184	3.74538e-21	7.29231e-21
IGKV2-29	0.393132	2.11228	1.71915	0.00121896	0.00140135
SULT1A4	2.15474	0.00304037	-2.1517	5.24007e-42	1.38094e-40
TNS4	8.65668	30.8313	22.1746	1.48831e-32	4.72056e-32
IFI16	12.391	17.9756	5.58461	2.44561e-18	4.37907e-18
PPIF	8.68524	19.4046	10.7194	4.07164e-32	1.25696e-31
BRD1	4.78532	5.86238	1.07706	1.98267e-16	3.35338e-16
EIF4A1	39.3566	2.47477	-36.8818	2.77067e-41	4.13706e-40
DOCK9	11.6151	5.10365	-6.51141	9.90852e-38	4.83732e-37
NCOA6	4.01222	6.3152	2.30297	9.25625e-41	8.51889e-40
PI3	113.814	274.3	160.486	0.0207752	0.0227031
URI1	5.67188	7.53952	1.86764	3.94645e-23	8.22452e-23
RAB40A	1.13115	0.118783	-1.01237	2.16446e-35	8.39722e-35
CCDC71L	2.3832	5.01686	2.63366	4.26768e-34	1.49284e-33
USP12	3.14964	4.76048	1.61084	1.41104e-29	3.83171e-29
OR2I1P	0.517249	2.51212	1.99487	1.75394e-17	3.05688e-17
OS9	15.7608	11.2978	-4.46295	1.90836e-34	6.85875e-34
RPUSD3	6.4326	3.18775	-3.24485	1.12912e-40	1.00533e-39
TRIM34	2.0011	0.116402	-1.88469	2.79767e-41	4.13706e-40
HTR7	0.410635	1.54281	1.13217	4.15551e-09	5.72066e-09
MSX2	0.412604	2.08249	1.66988	3.92431e-31	1.14977e-30
HDAC2	7.89347	4.55461	-3.33887	8.79304e-38	4.32643e-37
AAMDC	5.02478	2.37216	-2.65261	1.03476e-38	5.76807e-38
CLSTN1	9.8345	31.3703	21.5358	1.8998e-40	1.54876e-39
EHBP1L1	11.3108	8.61072	-2.70006	7.15001e-17	1.2244e-16
RGL1	1.76837	2.8282	1.05983	1.0596e-22	2.17279e-22
ERBB3	10.5306	5.91941	-4.61121	1.52054e-30	4.31987e-30
BLVRB	16.6961	12.7649	-3.93119	6.58388e-11	9.51678e-11
SATB1	2.97727	1.48091	-1.49636	5.70098e-37	2.5464e-36
PRKDC	7.32394	12.2974	4.97344	2.64085e-25	5.94204e-25
TGM1	37.0627	15.4288	-21.634	3.68854e-22	7.4237e-22
KDM3A	5.73396	4.18144	-1.55252	5.02439e-24	1.08008e-23
ANGEL1	2.50804	3.77514	1.26709	1.52154e-32	4.82041e-32
SOX2	4.78775	15.731	10.9432	1.89518e-10	2.70666e-10
KLHL18	3.85408	2.70183	-1.15225	7.50876e-24	1.6066e-23
AC083798.2	3.62196	0.625949	-2.99601	5.17959e-41	5.64565e-40
POLR2J3	11.9545	0.980838	-10.9737	2.17773e-41	3.67615e-40
SCRN1	3.30455	8.25263	4.94808	2.77643e-36	1.16519e-35
SNRPE	10.6092	12.9318	2.32257	3.8663e-10	5.4748e-10
SPRY1	6.4773	4.09044	-2.38686	7.66319e-23	1.57936e-22
ST6GALNAC6	6.93983	3.53535	-3.40449	1.72469e-39	1.09734e-38
SUMO2	19.0054	16.3511	-2.65429	5.11954e-15	8.32693e-15
AC142381.3	1.70183	0.581135	-1.1207	1.52424e-29	4.12992e-29
ELN	9.96563	3.65687	-6.30877	7.93825e-26	1.82197e-25
ARHGAP33	3.57074	2.49064	-1.0801	2.21265e-20	4.20959e-20
WDR26	8.83681	7.55119	-1.28562	1.07275e-06	1.36526e-06
TRAPPC10	3.82149	2.78388	-1.0376	9.30873e-29	2.42876e-28
NAGK	20.0554	4.50044	-15.5549	7.579e-41	7.31308e-40
ATF7IP	3.57263	6.06592	2.49329	5.06556e-37	2.27446e-36
CUEDC1	5.99102	4.19426	-1.79677	5.77959e-23	1.19812e-22
C8orf37	0.672865	1.85811	1.18525	5.78395e-39	3.33587e-38
DMRTA2	0.864666	2.07006	1.20539	6.71478e-06	8.31458e-06
PPP1R2	5.79481	7.33238	1.53757	1.87264e-19	3.46804e-19
HERC2P3	4.45321	0.541246	-3.91197	4.02013e-40	2.94461e-39
FLT3LG	3.42832	0.714851	-2.71347	7.71504e-41	7.39016e-40
KIAA1191	7.97258	9.86991	1.89733	3.73456e-11	5.44475e-11
EID1	7.86605	12.6094	4.74338	1.48186e-29	4.01963e-29
SF3B5	14.7838	24.1431	9.35924	6.37848e-35	2.37722e-34
FBLN5	5.61934	3.06382	-2.55552	4.43192e-26	1.02534e-25
NME6	3.93833	2.31534	-1.62299	1.14703e-39	7.60097e-39
ERVK3-1	5.78585	2.48905	-3.2968	2.59085e-39	1.58848e-38
P4HA1	2.86402	8.70875	5.84473	1.71087e-39	1.09033e-38
CNOT6	3.18545	5.37865	2.19319	5.53677e-40	3.89952e-39
FAM83D	9.96785	12.5697	2.60185	0.000611045	0.000709753
TTC12	2.62151	1.57072	-1.05079	5.495e-30	1.5196e-29
NAAA	4.59156	2.15521	-2.43635	2.56842e-37	1.19522e-36
TMEM65	2.10468	3.5303	1.42562	3.58089e-28	9.05274e-28
TRMT61A	2.96745	4.10979	1.14234	1.01802e-21	2.01896e-21
FKBP8	20.1442	21.8743	1.73005	0.00458028	0.00514503
RHOF	2.94881	0.648866	-2.29995	3.62239e-35	1.37809e-34
SLC35E1	4.34355	6.62481	2.28126	6.15942e-40	4.29138e-39
CHD6	2.74592	4.27803	1.5321	1.07305e-29	2.92764e-29
AC005674.2	1.58508	0.384729	-1.20035	2.16293e-36	9.16119e-36
CCDC82	3.71712	2.5885	-1.12862	6.802e-25	1.50886e-24
C19orf53	12.1102	15.2143	3.10415	4.04001e-08	5.38162e-08
TMEM14A	6.22194	11.955	5.7331	3.94052e-28	9.94362e-28
RBP7	5.82616	2.53328	-3.29288	4.65546e-29	1.23104e-28
CYC1	15.8714	20.7858	4.91441	2.46711e-11	3.61609e-11
BRD7	7.87367	5.27988	-2.59379	3.64182e-40	2.70731e-39
MIATNB	2.2028	1.15182	-1.05098	2.11263e-36	8.95503e-36
SEPHS1	4.63516	6.48245	1.84729	6.35062e-28	1.58689e-27
NMD3	4.32639	7.31114	2.98476	1.18672e-40	1.04226e-39
STX4	8.82635	4.52734	-4.29901	2.25924e-40	1.79906e-39
DLEU1	2.92365	0.881968	-2.04169	8.95608e-41	8.28994e-40
TMTC3	2.24581	7.13136	4.88555	2.62498e-42	1.19687e-40
RNF6	4.14909	6.50016	2.35107	5.68437e-34	1.9659e-33
BANP	3.31393	1.72358	-1.59035	9.1057e-41	8.40709e-40
TMEM64	2.22056	3.85601	1.63544	4.49637e-29	1.18983e-28
RPL37	76.6285	25.6856	-50.943	1.30721e-39	8.55414e-39
HDAC7	7.47355	4.75844	-2.71511	1.48337e-35	5.8373e-35
ENO3	3.18347	0.883233	-2.30023	1.09251e-40	9.78276e-40
AFG3L1P	4.71017	1.98565	-2.72452	3.19325e-40	2.40635e-39
GRHL3	13.0415	7.30638	-5.73517	1.3105e-18	2.36123e-18
RUSC1	7.69482	5.832	-1.86282	1.20888e-29	3.29271e-29
LAMTOR2	9.84694	7.46317	-2.38377	7.83239e-26	1.79917e-25
DAP3	9.45614	7.8703	-1.58584	7.71905e-19	1.40227e-18
DKC1	6.86294	9.8272	2.96426	7.98968e-26	1.83321e-25
FYN	4.55902	2.52456	-2.03446	3.2927e-32	1.02253e-31
DBNDD2	8.40015	1.46877	-6.93137	2.2897e-41	3.78364e-40
ARHGEF2	5.41404	4.20406	-1.20998	1.92371e-18	3.45356e-18
ZNF638	8.65512	4.69552	-3.9596	4.43545e-40	3.2111e-39
TK2	3.35784	2.17849	-1.17935	3.5891e-33	1.17817e-32
PRSS22	16.4218	6.47462	-9.94716	4.90274e-25	1.09433e-24
STK39	5.90856	4.61362	-1.29493	2.17376e-13	3.37427e-13
GBP2	8.34354	6.06491	-2.27864	1.54469e-11	2.27713e-11
CLCA2	12.6683	33.7794	21.1111	2.99439e-21	5.84877e-21
TOP2A	4.43243	14.5155	10.0831	6.15949e-40	4.29138e-39
FBXO25	3.37996	2.34562	-1.03434	1.03573e-26	2.46204e-26
TMEM181	3.42324	6.13657	2.71333	5.91517e-41	6.12011e-40
ANXA1	475.621	68.6401	-406.981	8.53134e-34	2.91969e-33
LAMTOR5	13.1146	9.65849	-3.45608	6.16768e-31	1.78656e-30
MIR5587	0.0144667	2.49671	2.48224	4.08615e-40	2.99098e-39
AC106886.4	1.12114	0.0273192	-1.09382	5.51113e-42	1.39011e-40
RALGPS1	2.68207	1.23241	-1.44966	6.60184e-30	1.81927e-29
TSPAN33	2.0813	3.65801	1.57671	7.93698e-14	1.24594e-13
C5orf51	2.95196	6.6935	3.74155	1.90397e-42	1.16112e-40
UCN2	1.4578	2.54119	1.08338	3.16069e-11	4.62035e-11
MT-ND5	121.221	252.779	131.557	5.83974e-16	9.76727e-16
HOTAIRM1	7.11817	3.96717	-3.15101	1.37239e-25	3.1186e-25
KCTD10	6.06332	4.58303	-1.48029	7.84074e-28	1.95077e-27
IGHV3-11	1.71474	4.93356	3.21882	7.78134e-09	1.0619e-08
JUND	11.4161	34.4339	23.0178	1.99294e-37	9.40974e-37
CAPZA2	7.22224	5.90674	-1.31549	3.12127e-11	4.56333e-11
NOL8	4.8666	3.79408	-1.07252	3.42437e-23	7.15549e-23
Z74021.1	2.4079	5.82966	3.42176	2.0791e-34	7.44559e-34
RPPH1	1.31375	0.000652444	-1.3131	1.52811e-42	1.16112e-40
HMCES	6.39483	9.88597	3.49114	2.1862e-30	6.15714e-30
SQOR	12.1146	7.46303	-4.65152	7.89087e-28	1.9628e-27
SPRR2E	85.503	46.417	-39.0861	0.00299498	0.0033927
DSP	29.7081	72.7809	43.0728	9.51484e-22	1.88836e-21
SKA1	1.24361	3.29053	2.04692	3.19479e-36	1.32962e-35
PNLIP	1.44107	0.0072739	-1.4338	2.50524e-35	9.67491e-35
SDC3	2.53092	5.32637	2.79545	9.02327e-32	2.74243e-31
ATP1A2	2.91289	0.784162	-2.12873	6.58639e-29	1.73038e-28
ABR	10.8444	5.92341	-4.92103	1.68731e-37	8.04272e-37
NUDT7	2.43554	1.34613	-1.08941	7.8001e-32	2.3779e-31
SLC25A27	4.72829	1.25817	-3.47011	1.09482e-38	6.08192e-38
ZBED5	5.35867	3.5814	-1.77727	2.0978e-33	6.9678e-33
RPL13P12	11.2315	22.1334	10.9019	3.202e-12	4.81e-12
NCAPH	2.27414	5.09156	2.81743	8.76988e-36	3.51531e-35
RABEP1	3.64527	5.1404	1.49513	2.59343e-29	6.96334e-29
TPSB2	8.51604	2.93033	-5.58571	3.29885e-28	8.35896e-28
DOCK7	2.21575	3.29936	1.0836	2.71634e-31	8.02486e-31
AC135050.6	4.91968	3.78654	-1.13314	7.66376e-20	1.43225e-19
ZYX	15.1494	24.6967	9.54728	3.64756e-20	6.89178e-20
MT-ATP6	1155.74	836.384	-319.36	3.9483e-15	6.44194e-15
EMP1	113.372	15.9186	-97.453	2.05692e-35	7.99979e-35
PPIA	81.1888	45.2105	-35.9782	1.30608e-34	4.75006e-34
HNRNPAB	13.9698	24.8195	10.8496	1.29565e-38	7.09991e-38
AC233968.1	2.50946	0.0468571	-2.4626	1.01946e-30	2.92221e-30
IPO13	4.89896	6.47416	1.5752	4.77507e-20	8.98044e-20
AP3S2	3.5228	2.04438	-1.47842	2.99078e-38	1.56624e-37
SDCBP	9.87009	11.7366	1.86653	4.24896e-09	5.84661e-09
BRIP1	1.2755	2.30545	1.02996	2.77997e-37	1.28876e-36
SORL1	2.42656	3.69673	1.27017	2.00468e-10	2.86045e-10
LGR4	3.67991	4.78261	1.1027	0.00443296	0.00498158
RBM38	4.20344	8.16166	3.95822	7.17932e-34	2.46651e-33
EDF1	30.8904	27.6226	-3.26782	3.25172e-10	4.61584e-10
DNTTIP2	6.34931	5.25994	-1.08937	7.11734e-20	1.33149e-19
PLA2G4C	2.68795	0.959875	-1.72808	1.08721e-18	1.96467e-18
SPPL2B	7.18678	4.37366	-2.81312	3.05638e-37	1.41153e-36
SHE	1.87747	0.487879	-1.38959	5.07567e-35	1.91048e-34
ALPK1	3.03333	1.93271	-1.10062	4.10789e-29	1.08992e-28
NR2C1	4.45585	2.47457	-1.98128	2.25844e-38	1.19988e-37
NDN	3.86717	5.61153	1.74435	3.00193e-09	4.14978e-09
CARD14	4.76186	1.77839	-2.98347	2.45067e-36	1.03401e-35
SELENOO	5.84892	7.04749	1.19857	9.64829e-10	1.35229e-09
PLA2G4A	2.42449	3.94622	1.52173	6.37278e-06	7.89377e-06
SEMA4C	4.64657	5.72291	1.07633	8.77871e-05	0.000104953
NUP98	6.02074	7.26343	1.24269	2.14559e-18	3.8475e-18
PIGX	3.22086	7.15142	3.93056	2.76521e-39	1.68317e-38
POLI	3.35745	1.45773	-1.89972	2.09704e-39	1.30998e-38
RAP1GAP2	2.46914	3.67009	1.20095	2.16549e-12	3.27266e-12
NFATC4	6.98338	1.58254	-5.40084	9.72935e-41	8.84225e-40
IGHV3-20	0.224552	1.73552	1.51097	1.54639e-19	2.869e-19
FAU	42.7352	29.0207	-13.7145	1.56383e-28	4.02855e-28
ALYREF	8.61082	11.8752	3.26439	3.69571e-22	7.43678e-22
HNRNPL	18.688	10.9988	-7.68919	3.7844e-40	2.79995e-39
DEPDC1	1.38766	3.73263	2.34497	2.01842e-38	1.07809e-37
TRMT6	3.06067	4.28489	1.22422	8.01777e-22	1.59499e-21
DIAPH1	9.87267	12.0388	2.16616	2.56848e-07	3.33085e-07
DSG3	23.3099	46.9267	23.6167	1.62567e-10	2.32447e-10
PMS2P6	3.08113	0.0196758	-3.06146	6.09616e-42	1.4405e-40
COX7C	35.6115	19.2665	-16.345	5.0011e-40	3.56799e-39
ERP44	4.18556	8.32696	4.1414	2.95457e-42	1.2068e-40
PPIE	6.38844	3.37146	-3.01697	1.94298e-35	7.57272e-35
TAF4B	1.24711	2.65071	1.4036	3.42665e-36	1.42177e-35
PCID2	5.51659	4.29749	-1.2191	2.33569e-25	5.26297e-25
SARM1	1.94311	0.565661	-1.37744	1.28604e-39	8.4308e-39
SRF	5.47739	9.82396	4.34657	9.25749e-36	3.70266e-35
LTB	1.796	2.81275	1.01674	6.90331e-07	8.8451e-07
SLC6A8	8.76364	14.5605	5.79684	1.11088e-14	1.78778e-14
SULT1A3	4.48601	0.0219867	-4.46402	8.82193e-42	1.84271e-40
HCAR3	3.72146	1.54969	-2.17177	4.00568e-24	8.64646e-24
MICAL3	3.38871	2.29324	-1.09547	7.85316e-23	1.61699e-22
MEGF9	2.96046	5.89196	2.93151	9.53012e-26	2.17914e-25
RNF139-AS1	1.57921	0.429669	-1.14954	7.46316e-41	7.23084e-40
TATDN1	4.62895	3.4933	-1.13566	3.74102e-22	7.52658e-22
GTF2IP4	6.35832	2.95985	-3.39847	3.30014e-40	2.47177e-39
APOBEC3C	4.08257	10.1682	6.08567	2.03719e-42	1.16112e-40
COX11	4.67659	3.64129	-1.03529	2.56027e-28	6.52206e-28
AKIRIN2	6.28295	10.451	4.16809	1.53316e-36	6.58544e-36
SUN2	11.7328	9.33898	-2.39382	1.09155e-15	1.80778e-15
NRP1	2.83723	4.0733	1.23607	3.87157e-09	5.33512e-09
AC080112.2	0.0133203	3.28756	3.27424	2.29308e-42	1.16112e-40
SYNPO	3.84447	7.18587	3.3414	1.06826e-17	1.87312e-17
DDB1	10.4636	8.32845	-2.13511	5.57371e-26	1.28598e-25
MFF	8.22296	4.98197	-3.24098	2.0319e-34	7.28605e-34
MAGEA4	0.0135562	3.89745	3.8839	1.16384e-13	1.81686e-13
ATRX	3.52017	5.18985	1.66967	7.49211e-31	2.15995e-30
ALDH1B1	2.68139	6.22753	3.54614	6.10516e-24	1.3101e-23
FYB1	1.38739	4.03196	2.64457	7.75778e-23	1.59825e-22
CTCF	4.40695	7.6705	3.26355	2.80822e-42	1.2068e-40
HOMER3	4.03306	5.82253	1.78946	1.60311e-14	2.56905e-14
PSMB4	18.8798	21.3911	2.51126	0.000387109	0.000452657
ZNF845	1.27569	2.48987	1.21418	3.06315e-38	1.60047e-37
SLC33A1	3.08473	4.08581	1.00108	5.79163e-18	1.02238e-17
HRH1	1.42956	2.48957	1.06002	5.8164e-16	9.72972e-16
ERCC5	6.9671	2.23327	-4.73383	3.71348e-41	4.75006e-40
TSPAN1	2.76613	4.91326	2.14712	5.75508e-06	7.1383e-06
GPR107	4.34582	7.20804	2.86222	9.57823e-37	4.20271e-36
GTF2IP13	1.31873	2.46194	1.14321	5.95419e-21	1.15317e-20
POLQ	1.60573	2.69835	1.09262	3.41714e-27	8.26054e-27
DDX58	2.27373	5.23027	2.95654	1.05325e-33	3.56833e-33
REX1BD	7.50401	4.21676	-3.28725	5.90494e-36	2.39955e-35
AC008655.1	2.81287	0.000652444	-2.81221	1.5281e-42	1.16112e-40
CYBC1	7.50051	4.55711	-2.9434	7.38025e-38	3.65597e-37
CENPB	6.67942	12.6264	5.94702	1.46516e-39	9.49155e-39
ZBTB48	5.08597	2.95525	-2.13072	1.51127e-34	5.46375e-34
ACOX3	6.55902	3.61386	-2.94516	7.54615e-31	2.17439e-30
AC025257.1	1.39542	0.000652444	-1.39477	1.52806e-42	1.16112e-40
NSFL1C	9.39803	6.37929	-3.01874	1.26068e-33	4.25271e-33
STC1	1.1347	6.59232	5.45762	1.43298e-34	5.19439e-34
JPT2	7.0215	10.8561	3.83458	1.42599e-30	4.061e-30
LYAR	4.00535	5.55812	1.55277	1.80748e-16	3.06084e-16
MIR3682	0.0158499	3.67984	3.66399	3.26897e-42	1.25096e-40
DSN1	2.85643	4.96938	2.11295	4.60799e-38	2.33847e-37
EGLN2	7.1791	1.90598	-5.27312	4.76569e-41	5.37674e-40
ATP5PO	20.4173	5.75676	-14.6606	2.40147e-41	3.856e-40
WNT5B	4.1182	2.42219	-1.69601	1.00474e-24	2.21409e-24
ERAP2	2.41485	4.16291	1.74806	4.46771e-07	5.74988e-07
SLC25A4	4.71102	3.37917	-1.33185	1.429e-19	2.65389e-19
NME2P1	0.330986	3.62373	3.29274	5.24e-42	1.38094e-40
MATR3	10.5385	0.483209	-10.0553	3.65141e-41	4.71018e-40
SMIM15	5.40045	7.74409	2.34364	2.23483e-31	6.64521e-31
TIMMDC1	9.18914	10.645	1.45584	4.90482e-05	5.91305e-05
UQCRFS1	5.80898	8.06299	2.25401	1.08585e-27	2.68673e-27
EFHD1	2.89309	1.29343	-1.59966	7.11398e-25	1.57742e-24
INTS6-AS1	1.61348	0.180662	-1.43281	8.38184e-41	7.85771e-40
SLC37A4	3.37092	2.17433	-1.1966	2.82397e-30	7.89739e-30
CLHC1	2.44437	0.861516	-1.58286	2.46771e-39	1.52326e-38
AUNIP	0.85851	2.03675	1.17824	3.17498e-29	8.48955e-29
TRAF3IP2-AS1	1.64935	0.499967	-1.14938	5.40226e-40	3.81948e-39
CENPA	1.99824	4.42435	2.4261	1.34835e-34	4.89405e-34
OBSL1	5.10478	4.08212	-1.02266	1.02048e-10	1.46793e-10
EXOSC10	7.28239	5.85211	-1.43028	7.79506e-24	1.6672e-23
TMEM80	7.18521	2.7627	-4.42251	2.67678e-39	1.63661e-38
DAD1	17.3712	27.9995	10.6282	2.32448e-34	8.30809e-34
ZACN	4.63184	0.129237	-4.5026	8.24886e-42	1.77012e-40
RNF2	2.41	4.44686	2.03686	8.5212e-41	7.94825e-40
AL513327.1	2.53803	0.596005	-1.94202	9.10537e-41	8.40709e-40
KAT5	6.88489	4.54692	-2.33797	1.20881e-37	5.86627e-37
ECH1	17.2743	12.4656	-4.80869	3.27318e-22	6.59741e-22
IGLV7-46	1.59434	4.03155	2.43721	0.00205048	0.002337
KLK12	18.1787	3.85697	-14.3217	3.10631e-26	7.23838e-26
UBE2D3P1	0.398219	1.71545	1.31723	2.75384e-40	2.11732e-39
AC004000.1	0.256926	1.58552	1.32859	1.83555e-36	7.81978e-36
TNK2	9.09009	5.61311	-3.47697	8.10571e-31	2.33303e-30
RGS11	3.07545	0.356486	-2.71897	1.52075e-40	1.27548e-39
NHLRC2	2.02608	3.46836	1.44229	1.25724e-40	1.09196e-39
EIF3F	20.0277	6.87858	-13.1491	2.36158e-41	3.8426e-40
N4BP2	1.00769	2.44066	1.43297	2.92701e-39	1.7699e-38
PLD6	0.949516	1.9514	1.00188	6.4113e-27	1.53667e-26
PVR	3.34601	7.60107	4.25505	1.63768e-38	8.83774e-38
IGLV2-11	3.50516	10.1565	6.65135	7.64697e-10	1.07466e-09
ZER1	4.93966	8.52732	3.58765	8.51863e-38	4.19517e-37
COX6A1P2	2.8473	6.70613	3.85883	7.71504e-41	7.39016e-40
AC005884.2	0.0625793	2.03493	1.97235	1.09692e-41	2.16761e-40
GRN	33.3542	46.8591	13.5049	3.5529e-13	5.48485e-13
AL449212.1	0.0422545	2.48594	2.44368	2.45361e-42	1.18184e-40
DCAF12	5.42545	8.96966	3.5442	1.0917e-32	3.4888e-32
ATAD3B	5.59154	2.90138	-2.69016	4.49842e-38	2.28712e-37
TFAM	3.14679	4.9823	1.83551	9.84391e-33	3.15229e-32
ZNF460	0.754001	3.21877	2.46477	4.87966e-39	2.85181e-38
MIR4477B	0.0226629	4.41324	4.39058	4.20945e-42	1.3369e-40
CDC42	14.7198	18.3167	3.59691	2.8937e-12	4.35105e-12
ZNF777	2.3016	5.56283	3.26123	2.71521e-42	1.20298e-40
EIF4EBP3	5.43928	2.22266	-3.21661	6.60061e-38	3.29192e-37
GALK2	3.34851	1.82071	-1.5278	3.47118e-39	2.06936e-38
SLC25A24	3.24318	4.84562	1.60244	4.77783e-24	1.02808e-23
PTER	1.88173	3.20232	1.32058	1.12945e-28	2.93441e-28
C18orf25	5.74726	3.65259	-2.09467	5.20315e-16	8.71715e-16
MMP23B	2.36051	0.266403	-2.09411	2.37418e-40	1.8687e-39
CRADD	3.50141	1.40306	-2.09835	2.89239e-41	4.19275e-40
NFS1	5.20837	3.3482	-1.86017	3.59045e-36	1.48594e-35
ZHX2	2.75055	5.02668	2.27614	1.20422e-35	4.76785e-35
TGM3	70.1143	22.3404	-47.7739	5.79866e-23	1.20185e-22
ZNF160	3.71529	2.25832	-1.45697	1.33949e-27	3.30069e-27
UBE2D2	11.4943	9.28379	-2.21049	3.37356e-25	7.56435e-25
GNA11	6.93664	8.15096	1.21433	3.89804e-12	5.8393e-12
TNKS1BP1	15.9193	14.2255	-1.69374	0.000240135	0.000283299
MHENCR	3.73036	2.67667	-1.05369	9.65489e-15	1.55814e-14
TBCAP1	0.244974	1.50649	1.26152	8.99614e-37	3.95521e-36
APRT	20.098	14.8163	-5.28174	6.48976e-21	1.25556e-20
C3	20.4148	11.8258	-8.58901	2.34756e-17	4.0753e-17
TCOF1	4.202	5.62732	1.42532	3.58648e-20	6.77872e-20
AC009120.1	0.793404	2.07116	1.27776	3.59076e-36	1.48594e-35
DHCR7	6.45649	16.973	10.5165	5.69969e-20	1.06921e-19
IGHG4	6.76504	59.9189	53.1539	6.83994e-20	1.27981e-19
DEF8	7.30131	3.69515	-3.60615	4.45921e-41	5.20728e-40
MYL12B	32.7171	60.6715	27.9544	4.06122e-31	1.18893e-30
EML2	8.9807	3.84347	-5.13723	1.93136e-40	1.56766e-39
USP34	6.63078	4.36713	-2.26365	1.89842e-35	7.40432e-35
TAF1C	7.47839	5.17193	-2.30646	5.99778e-31	1.73872e-30
HSD17B7	4.31821	2.06924	-2.24897	1.30713e-39	8.55414e-39
GABARAP	32.337	6.26104	-26.076	2.80974e-41	4.14928e-40
RCOR3	5.39097	3.56831	-1.82266	1.79987e-34	6.4775e-34
AL590399.3	1.23191	0.0038413	-1.22807	5.32918e-42	1.38094e-40
UGT1A10	2.96082	1.85123	-1.10959	4.93289e-11	7.15858e-11
LMCD1	5.47276	1.82906	-3.6437	1.56414e-39	1.00501e-38
AC011330.2	1.73232	0.400257	-1.33206	3.71289e-38	1.90713e-37
PTP4A1	9.73639	12.626	2.88959	4.40823e-08	5.86571e-08
LETMD1	7.5511	3.96528	-3.58581	1.66417e-38	8.96355e-38
NIPSNAP2	4.8345	7.45597	2.62146	2.37096e-26	5.54996e-26
MAP1LC3B	6.66114	8.10817	1.44703	1.12649e-13	1.75931e-13
DCTN1	9.36155	8.28754	-1.07402	3.08523e-08	4.12775e-08
USF1	7.73839	6.56363	-1.17477	5.38089e-15	8.74943e-15
HLA-DPB1	7.06384	11.7575	4.69366	7.86763e-08	1.03846e-07
ZNF540	1.21021	0.107953	-1.10225	1.45834e-41	2.73908e-40
TMEM160	4.29287	7.42752	3.13465	6.12853e-33	1.9845e-32
AC005041.1	0.757931	1.97226	1.21433	1.02657e-23	2.18583e-23
TMEM259	17.6811	11.8893	-5.79182	3.836e-34	1.34954e-33
NDUFB5	9.08265	7.43256	-1.65009	2.49095e-14	3.96926e-14
INTS7	2.95994	5.0331	2.07316	1.61592e-39	1.03643e-38
CALM2	25.7576	15.9612	-9.79637	3.41339e-36	1.41681e-35
TRA2B	10.8893	6.926	-3.96331	4.39342e-37	1.98901e-36
SAFB2	7.22465	4.59785	-2.62681	1.97019e-38	1.05438e-37
LINC00665	3.4908	2.3699	-1.12091	6.85747e-10	9.647e-10
SLC29A1	5.46671	6.71752	1.25081	0.000313208	0.000367533
FAM3B	8.21112	1.22461	-6.98651	1.59652e-37	7.62981e-37
RPL27	75.7588	59.6119	-16.1469	2.26323e-16	3.82438e-16
AL139260.3	1.09619	0.0389805	-1.05721	6.72871e-31	1.94395e-30
JADE2	2.51363	5.68688	3.17325	1.37547e-31	4.13357e-31
UCHL1	2.33463	16.8745	14.5399	6.14908e-16	1.02768e-15
AADAC	0.663395	2.58006	1.91667	0.00772614	0.00861099
MRPL40	5.28327	6.5288	1.24553	2.5154e-12	3.78949e-12
RNA5SP392	1.36858	0.000652444	-1.36793	1.52792e-42	1.16112e-40
SH3TC1	4.82628	2.83879	-1.98749	2.30745e-22	4.6818e-22
STX11	2.00869	3.1718	1.16311	3.44781e-10	4.89041e-10
CPD	2.741	5.84255	3.10156	2.48689e-38	1.31562e-37
CDV3	9.50678	15.229	5.72223	2.36741e-31	7.02424e-31
BAZ2B	4.10306	2.42726	-1.6758	6.23574e-36	2.52815e-35
MAP6D1	0.992264	2.04458	1.05232	3.20968e-28	8.13698e-28
PYM1	9.02838	5.07673	-3.95165	4.46406e-37	2.01921e-36
PIGK	2.28572	3.7684	1.48269	2.90196e-34	1.02884e-33
TULP4	2.06418	3.76488	1.7007	3.64692e-36	1.50861e-35
RNF183	1.97062	0.268876	-1.70174	5.19345e-35	1.95145e-34
GGT5	4.3137	2.50046	-1.81324	4.11551e-21	8.00161e-21
ACTA1	1.90717	0.650268	-1.2569	1.70477e-24	3.723e-24
OPA1	4.94699	8.3947	3.44771	7.23347e-34	2.48434e-33
YWHAE	28.1202	35.9328	7.81264	1.06526e-09	1.49172e-09
ZMYM6	2.88109	1.62412	-1.25697	1.21636e-40	1.06402e-39
RPL13	208.329	46.8776	-161.451	3.6324e-41	4.71018e-40
CBX2	1.81529	4.19545	2.38016	3.35717e-24	7.26517e-24
LRRC14	5.10556	3.97322	-1.13234	3.85704e-19	7.08532e-19
ADNP	5.04188	9.53643	4.49455	3.0813e-42	1.21521e-40
CAMK1D	2.6236	3.6773	1.05369	3.47422e-09	4.79238e-09
RNA5SP498	0.138918	3.06758	2.92867	5.73681e-39	3.31072e-38
KLC2	4.43577	6.55246	2.11669	9.58879e-30	2.62135e-29
NT5C	9.64845	6.38298	-3.26547	2.87642e-28	7.3088e-28
KRT4	1002	74.006	-927.996	2.43818e-32	7.632e-32
AL359643.3	1.17786	2.32934	1.15147	4.94023e-27	1.18719e-26
FLI1	2.19403	1.17289	-1.02113	4.01691e-25	8.99404e-25
BPNT1	3.46136	4.80922	1.34786	1.62816e-23	3.4448e-23
DHRS2	0.175292	2.29432	2.11903	0.0084788	0.00942785
CYP11A1	2.30632	0.290224	-2.0161	4.36105e-37	1.97587e-36
SERTAD4	2.03918	3.36468	1.3255	9.06641e-11	1.30554e-10
TCHP	4.95886	2.31627	-2.64259	2.79757e-41	4.13706e-40
WWC3	3.49304	5.49669	2.00365	8.25025e-37	3.64331e-36
RNF181	13.533	12.5182	-1.01475	0.00014754	0.000175113
LINC00330	1.47625	0.146989	-1.32926	1.24956e-34	4.55052e-34
MYDGF	9.00673	12.8692	3.86246	5.02982e-25	1.12168e-24
TTLL3	6.84655	1.10238	-5.74417	1.52796e-42	1.16112e-40
PCBD2	2.78574	1.47073	-1.31501	2.58842e-38	1.36479e-37
CDC73	3.09326	5.83931	2.74605	2.37205e-42	1.17395e-40
ISY1	4.95908	3.36282	-1.59627	4.50014e-37	2.0341e-36
AC244197.3	3.30344	0.43365	-2.86979	7.58797e-41	7.31308e-40
MPZL2	24.4128	12.5997	-11.8131	4.06423e-27	9.80968e-27
SDE2	2.6397	5.42968	2.78998	5.06646e-42	1.37453e-40
RN7SL2	15.2228	20.0172	4.79446	0.00155854	0.00178557
NEURL4	4.98541	3.01118	-1.97424	7.80088e-39	4.43166e-38
FLG-AS1	1.72282	0.356163	-1.36666	3.86656e-33	1.26774e-32
GRHL1	12.564	5.402	-7.16199	3.75556e-28	9.48567e-28
CDC6	1.8024	4.42322	2.62083	6.48361e-35	2.40986e-34
NRBP1	12.0701	9.66492	-2.40522	4.27399e-23	8.89699e-23
WDR19	4.09111	1.9474	-2.1437	4.00422e-36	1.65082e-35
AP001024.1	0.0470113	3.12711	3.0801	4.98153e-42	1.37192e-40
SIK1	2.65941	0.863429	-1.79598	3.40863e-18	6.0639e-18
ALDH3A2	13.1099	9.44908	-3.66084	1.16364e-13	1.81682e-13
EPHA1	11.7504	5.07071	-6.67965	1.49949e-34	5.42442e-34
TRIM73	1.30083	0.0436721	-1.25716	8.82149e-42	1.84271e-40
CD33	1.8133	0.22452	-1.58878	1.27608e-38	7.00313e-38
PRSS21	1.14945	3.29608	2.14662	0.000311727	0.000365874
GEMIN5	2.00318	4.10091	2.09773	3.90379e-41	4.83029e-40
ZNF266	5.02742	3.41423	-1.61319	1.21018e-27	2.98793e-27
AC125257.2	1.00828	0.000652444	-1.00763	1.52794e-42	1.16112e-40
RPS8	88.078	66.4469	-21.6311	1.05227e-17	1.84567e-17
ARRDC1	11.885	6.23366	-5.65139	3.65268e-38	1.87862e-37
KIAA1109	4.38026	3.11441	-1.26585	2.29384e-26	5.3725e-26
PSME3	8.63201	12.9625	4.33051	1.08201e-31	3.27403e-31
ATP5F1A	26.8817	11.6822	-15.1995	8.35011e-37	3.68592e-36
DICER1	4.22186	5.38092	1.15905	6.29222e-15	1.02088e-14
RPS15A	75.2629	15.3924	-59.8705	2.68356e-41	4.08936e-40
CHD8	5.36099	6.56173	1.20074	1.50618e-12	2.28917e-12
CNP	8.52643	5.69856	-2.82787	4.06625e-36	1.67514e-35
GADD45GIP1	6.5472	9.90532	3.35812	1.56306e-26	3.68448e-26
AC022149.1	4.67702	3.43013	-1.24689	5.35345e-08	7.09681e-08
FAM229A	2.50242	1.23523	-1.26719	1.43638e-30	4.08847e-30
PNMT	1.43403	0.107354	-1.32668	1.8563e-37	8.80242e-37
TUSC2	5.06468	3.61042	-1.45426	4.62291e-29	1.22272e-28
TPP1	7.5603	16.0294	8.46905	1.4771e-39	9.55879e-39
IVL	23.6919	14.553	-9.13891	1.20527e-12	1.8359e-12
WDR45	7.87495	3.77518	-4.09977	4.34885e-41	5.14879e-40
CXCL14	10.3183	59.8168	49.4986	4.54715e-21	8.83146e-21
EPCAM	3.48724	17.0702	13.5829	7.8691e-36	3.16348e-35
CCT5	14.5585	17.0464	2.4879	0.0106637	0.011806
AC118754.1	12.1208	0.124747	-11.9961	5.06583e-42	1.37453e-40
BBX	2.35865	4.46047	2.10182	3.83365e-38	1.9664e-37
AL391807.1	1.08259	0.0189237	-1.06366	4.73687e-42	1.35885e-40
NME2	36.6757	9.5804	-27.0953	2.77027e-41	4.13706e-40
CCDC47	6.72145	9.75827	3.03682	4.10765e-29	1.08992e-28
KCNIP2	1.39066	0.295391	-1.09527	1.65153e-40	1.37268e-39
RELCH	7.12863	4.16305	-2.96558	2.08839e-32	6.5615e-32
INPP5E	3.12819	4.45768	1.32948	2.36109e-27	5.75833e-27
CAPRIN1	8.68254	14.3716	5.68909	1.27792e-34	4.6507e-34
AC018638.5	5.84366	7.12605	1.28239	2.5687e-07	3.33085e-07
MUC20-OT1	11.333	2.04514	-9.28783	5.17833e-41	5.64565e-40
METTL27	1.03675	2.19224	1.15549	1.31816e-10	1.89043e-10
RFC5	3.11797	4.98287	1.8649	2.23976e-29	6.027e-29
GALNT12	4.63323	2.91369	-1.71954	5.17356e-21	1.00303e-20
AL078581.1	0.630542	1.63716	1.00662	1.27001e-28	3.28939e-28
SART1	7.2166	8.4682	1.2516	1.43499e-10	2.05637e-10
MTCO2P2	0.898209	5.13076	4.23256	2.8445e-41	4.17287e-40
CENPF	4.16197	6.9142	2.75223	1.36053e-22	2.78001e-22
AC104083.1	1.20218	3.54931	2.34712	2.95721e-33	9.74823e-33
ST14	11.5779	16.2907	4.71288	4.38668e-10	6.20368e-10
NFIX	7.60863	10.1742	2.56562	1.23863e-05	1.52072e-05
BAG1	10.383	4.87807	-5.50494	4.02113e-38	2.05776e-37
AL160408.2	6.87131	0.000652444	-6.87066	1.52796e-42	1.16112e-40
GAPDHP1	0.92015	6.75895	5.83879	4.54145e-42	1.35269e-40
ELK1	3.69821	5.77776	2.07955	3.7723e-38	1.93584e-37
GBP1P1	2.13354	4.06263	1.92908	3.76392e-22	7.5671e-22
AC004552.1	0.319033	1.98843	1.6694	2.84681e-37	1.31863e-36
ENKD1	3.90267	2.80901	-1.09366	2.25586e-21	4.42117e-21
AC104794.2	1.32168	0.026536	-1.29514	4.28133e-42	1.34399e-40
ADCY4	5.43365	0.842135	-4.59151	5.13666e-41	5.62677e-40
MRGPRF	3.9165	2.8074	-1.10909	4.00857e-11	5.83959e-11
LPCAT4	12.4947	4.81998	-7.67475	6.05741e-40	4.23239e-39
ULK3	11.2714	5.88424	-5.38716	1.71722e-35	6.72262e-35
NDEL1	9.02736	5.04595	-3.98141	7.0035e-36	2.82895e-35
ICE2	3.70318	2.55381	-1.14937	2.12382e-37	9.98902e-37
CALHM6	1.54261	2.64755	1.10494	2.62098e-06	3.28467e-06
GID8	6.63083	9.07973	2.4489	8.76717e-23	1.80316e-22
JUP	44.4862	132.115	87.6288	4.24344e-32	1.30852e-31
AP5B1	3.04706	5.22431	2.17724	3.92733e-34	1.3799e-33
DCTPP1	5.36334	9.0817	3.71836	2.76528e-33	9.14023e-33
CKM	1.3973	0.272517	-1.12479	3.5679e-26	8.29114e-26
PPP4R3B	4.87714	7.78086	2.90373	7.84253e-41	7.47454e-40
COPS7A	8.65856	9.82568	1.16712	1.45873e-06	1.84452e-06
SCGB2A2	2.38088	0.166847	-2.21404	7.37539e-16	1.22927e-15
RPL3	104.757	64.026	-40.7309	7.62573e-30	2.09617e-29
C12orf76	2.92007	1.0958	-1.82427	9.41211e-41	8.62476e-40
SLC2A4	2.3504	1.05828	-1.29212	1.8448e-21	3.6285e-21
DCP1A	2.57143	4.25397	1.68254	9.43284e-42	1.93019e-40
UGT1A6	4.90802	1.69	-3.21802	1.97064e-26	4.62449e-26
PRMT7	4.95387	2.74109	-2.21277	8.2431e-36	3.30898e-35
LINC00294	2.05353	3.40456	1.35104	5.42362e-29	1.43075e-28
ANXA2P2	4.76157	7.90069	3.13911	1.23925e-21	2.44975e-21
CAPNS1	47.6718	31.4846	-16.1872	1.29957e-30	3.7077e-30
RPP25	2.4051	5.1383	2.7332	5.48306e-33	1.78126e-32
CORO6	4.582	1.98002	-2.60198	9.8228e-22	1.94877e-21
DCAF1	3.15665	4.39106	1.23441	1.5758e-30	4.47487e-30
SNRPF	6.33379	9.04885	2.71506	3.01665e-19	5.56106e-19
PAFAH1B3	5.29735	7.71832	2.42097	1.24729e-17	2.18285e-17
FUBP3	5.58863	6.8131	1.22447	5.15151e-19	9.41131e-19
DRG2	6.05695	2.97007	-3.08689	5.3543e-41	5.74538e-40
ANGPTL4	6.38076	4.98626	-1.3945	7.23966e-07	9.26632e-07
INCENP	4.82119	5.82798	1.00679	5.07759e-09	6.96647e-09
RNF152	1.75865	2.92601	1.16736	1.5417e-09	2.1474e-09
IGKV4-1	3.83207	27.0083	23.1762	3.21097e-18	5.71967e-18
BX088651.4	1.06247	0.0391039	-1.02336	6.42773e-41	6.46725e-40
CHST2	0.756308	6.15494	5.39863	1.71871e-38	9.24299e-38
FKBP4	9.82671	12.6216	2.79487	2.11444e-07	2.75286e-07
KBTBD6	1.13978	3.18873	2.04895	3.67878e-42	1.28321e-40
RAF1	9.7619	6.16538	-3.59652	1.51326e-39	9.76655e-39
GTF2IP1	8.40723	0.286429	-8.1208	2.32818e-41	3.81278e-40
GLYR1	7.31777	8.46397	1.1462	9.21781e-12	1.36932e-11
TTC21A	2.0753	0.3181	-1.7572	4.84629e-41	5.43883e-40
RNF138	2.92516	5.11587	2.19071	3.04827e-39	1.8333e-38
CAPN12	2.28286	0.967025	-1.31584	2.09414e-31	6.2353e-31
AAR2	4.07227	6.31472	2.24245	1.16537e-36	5.07288e-36
ZFX	2.36931	3.67496	1.30565	4.99726e-32	1.53623e-31
AC104041.1	0.077825	2.25765	2.17983	1.41034e-41	2.66244e-40
PPP3R1	5.41655	6.99114	1.57459	1.19392e-27	2.94909e-27
RABIF	2.77088	4.64125	1.87038	1.1037e-38	6.12749e-38
ACTN4	25.6707	45.1609	19.4902	4.5878e-34	1.59614e-33
CTXN1	1.33049	4.04452	2.71403	1.61347e-31	4.82899e-31
MVK	7.12449	2.86746	-4.25703	1.75308e-39	1.11272e-38
FGD2	2.4336	0.665159	-1.76844	2.67669e-39	1.63661e-38
PEBP1	18.5354	21.9953	3.45989	0.000466269	0.000543716
MAMDC2	2.93359	1.67754	-1.25604	2.54955e-16	4.30026e-16
EPHX2	6.8346	2.55569	-4.27891	3.88146e-36	1.60201e-35
COA7	2.23888	3.80252	1.56363	6.63482e-36	2.68398e-35
STX18	4.83785	2.79047	-2.04738	3.71307e-41	4.75006e-40
DNAJB11	9.99348	6.81621	-3.17727	2.09314e-31	6.23402e-31
TFG	10.7184	14.3205	3.60217	1.07e-13	1.67394e-13
IGHV3-73	0.848625	2.74886	1.90024	2.38932e-07	3.10338e-07
MT-CO3	1234.3	1869.68	635.373	2.03479e-20	3.87859e-20
IL1RN	76.9662	26.2256	-50.7406	4.4427e-24	9.56908e-24
YBX1P10	0.963738	4.30517	3.34143	3.67896e-42	1.28321e-40
SYT7	1.51612	3.27229	1.75617	3.01482e-14	4.78737e-14
PSMD1	8.07954	11.8267	3.74717	3.04799e-36	1.2727e-35
NAPRT	15.595	8.10339	-7.49162	6.22046e-23	1.28806e-22
EPDR1	1.2957	2.41627	1.12056	6.88432e-10	9.68352e-10
PARP14	3.07362	7.36123	4.28761	3.36028e-39	2.01196e-38
MBNL1	5.92754	10.4676	4.54004	1.57124e-37	7.51553e-37
MOXD1	4.43447	3.16603	-1.26844	9.70197e-15	1.56529e-14
CSF3R	2.73987	0.70222	-2.03765	1.61005e-30	4.56978e-30
MMS19	7.44517	6.42267	-1.0225	2.82396e-13	4.37367e-13
MRPS35	6.10029	10.8088	4.70848	1.03473e-38	5.76807e-38
GLIS2	1.9494	3.66322	1.71381	3.06601e-22	6.1855e-22
ADCY6	4.82882	2.09282	-2.736	1.84097e-39	1.16312e-38
MECR	4.66278	2.96384	-1.69894	1.25179e-35	4.9526e-35
SPEN	5.70894	7.31458	1.60564	3.32851e-20	6.29655e-20
YWHAZP2	0.162701	1.98162	1.81892	5.24014e-42	1.38094e-40
STK11	7.24121	4.75646	-2.48474	4.65975e-40	3.3598e-39
TMEM161B-AS1	2.93079	0.890519	-2.04027	5.72226e-41	6.02244e-40
MRM2	4.10977	5.51523	1.40547	8.35201e-24	1.78389e-23
TUBG1	6.27413	10.2234	3.9493	4.1717e-34	1.46109e-33
YJU2	4.34082	5.63002	1.2892	3.44663e-16	5.79758e-16
AC011473.2	1.25563	0.000652444	-1.25498	1.52811e-42	1.16112e-40
FNTA	8.07292	5.21554	-2.85738	2.2148e-32	6.94662e-32
U2SURP	6.1099	7.48396	1.37406	3.75159e-07	4.84186e-07
LIMK1	3.31388	6.71816	3.40428	2.89293e-40	2.21047e-39
TNFSF13	3.15651	1.54429	-1.61222	1.55379e-35	6.1035e-35
CD27-AS1	6.01101	2.54296	-3.46806	2.20211e-39	1.36776e-38
POLR2F	9.06882	0.0174362	-9.05139	2.25394e-42	1.16112e-40
HEBP2	13.4983	4.51906	-8.97923	4.84247e-41	5.43883e-40
POLA1	1.8091	3.53419	1.7251	2.37424e-40	1.8687e-39
B3GALT6	2.50259	5.13322	2.63063	6.85743e-42	1.55999e-40
IL24	0.581536	1.85405	1.27251	7.53372e-17	1.2887e-16
PSMA7	18.4348	26.2745	7.83971	7.77136e-28	1.93439e-27
ELP6	4.6897	2.64639	-2.04331	1.91599e-40	1.55835e-39
MRPL38	9.37733	2.30857	-7.06876	3.19586e-41	4.41247e-40
PPWD1	5.12362	3.56607	-1.55755	4.03292e-35	1.53056e-34
CCSER2	3.47541	4.70169	1.22629	1.36778e-23	2.90168e-23
MIR497HG	1.56821	0.0474715	-1.52074	1.00879e-41	2.03386e-40
BTF3L4P2	5.87317	1.57965	-4.29352	2.61709e-41	4.04416e-40
TMEM158	2.56023	8.78264	6.22241	3.17803e-34	1.12346e-33
BCL9	2.20201	3.92306	1.72105	4.75756e-38	2.41104e-37
MAML1	3.87859	4.90499	1.0264	1.94868e-20	3.71768e-20
AL161431.1	1.19993	6.80805	5.60812	6.10362e-20	1.14399e-19
ETF1	8.99899	11.2649	2.26588	1.2356e-14	1.98415e-14
AGAP11	1.67835	0.0742095	-1.60414	3.3606e-41	4.48638e-40
ETFA	11.9616	5.83156	-6.13003	7.45785e-41	7.23084e-40
FCHO2	5.3158	4.16996	-1.14584	7.52558e-08	9.94031e-08
TASOR2	3.42547	5.57755	2.15208	1.7852e-35	6.9776e-35
WDR43	4.05911	7.98887	3.92976	2.01333e-40	1.62656e-39
AC007969.1	2.5991	0.224971	-2.37413	1.58552e-41	2.91311e-40
SLC31A1	3.36508	6.00258	2.6375	3.55178e-37	1.62327e-36
KIAA1549L	0.512155	2.14511	1.63295	2.56898e-18	4.59323e-18
RASSF3	3.54555	4.60381	1.05826	4.11592e-06	5.12542e-06
PGAP2	7.47994	4.47891	-3.00102	2.4288e-35	9.38484e-35
TIPARP	4.93246	6.41021	1.47775	1.00068e-08	1.36087e-08
TMEM263	2.1844	4.89053	2.70613	9.46878e-39	5.31054e-38
MISP	0.324092	3.59244	3.26835	3.24487e-32	1.00824e-31
ADSL	5.98522	4.91318	-1.07204	7.9553e-18	1.40072e-17
TMEM234	4.02902	2.14058	-1.88844	6.7449e-39	3.84768e-38
DOK4	5.70374	3.53597	-2.16777	3.46603e-32	1.07453e-31
MFSD5	8.20171	6.10468	-2.09703	1.76639e-20	3.37401e-20
PLA2G4F	4.12321	2.36305	-1.76016	3.42509e-15	5.59742e-15
SCN1B	2.13884	0.851164	-1.28767	1.50862e-28	3.89104e-28
NUDCD3	7.67905	5.58425	-2.0948	1.67591e-33	5.60475e-33
CARD8	3.82136	1.40967	-2.41169	9.10559e-41	8.40709e-40
TPX2	3.35436	13.7077	10.3534	3.74146e-42	1.28465e-40
LAMC2	2.58716	39.2282	36.6411	1.0787e-41	2.13568e-40
MCMBP	5.18736	7.55375	2.36638	2.09036e-37	9.8443e-37
CNOT11	6.39147	9.21507	2.8236	1.30699e-31	3.93422e-31
ZNF76	5.45369	2.65377	-2.79992	8.95586e-41	8.28994e-40
SPHK2	3.25839	2.14286	-1.11553	9.84443e-34	3.34346e-33
TLR2	1.59556	4.1595	2.56394	6.50293e-33	2.10326e-32
KANK2	8.18917	5.35608	-2.8331	5.44535e-20	1.02235e-19
FAM122B	4.2429	5.93857	1.69567	3.04847e-27	7.38069e-27
CYP2C18	5.47252	2.25765	-3.21487	1.2493e-22	2.55655e-22
PSMC3	11.2703	14.401	3.13064	9.8546e-18	1.7307e-17
MKNK1	6.83753	3.59285	-3.24468	2.89215e-41	4.19275e-40
SNHG22	1.55351	0.373619	-1.17989	1.4417e-39	9.34511e-39
PNPT1	3.02268	5.22281	2.20013	3.62454e-38	1.86524e-37
XRCC1	4.43948	5.67958	1.2401	4.44138e-21	8.62756e-21
DLG2	1.96361	0.108337	-1.85527	5.26626e-41	5.6954e-40
AC004997.1	1.89751	0.0313733	-1.86614	3.8052e-42	1.29437e-40
LRP5	4.39574	10.2019	5.80619	1.08165e-37	5.26778e-37
ESF1	2.62278	5.91745	3.29466	1.31892e-41	2.52016e-40
AC080112.1	2.54212	0.867469	-1.67465	2.00169e-34	7.18009e-34
AP1B1	8.70414	10.6519	1.9478	6.21557e-11	8.99269e-11
CXCL2	2.13667	3.20415	1.06748	0.000255683	0.000301318
BMPR1A	1.91578	2.93583	1.02006	1.03977e-35	4.14662e-35
SYNPO2L	2.32059	0.441464	-1.87913	4.06829e-27	9.8154e-27
SERPINF1	12.7019	8.23632	-4.46562	1.94807e-15	3.20315e-15
FOXO1	2.63017	4.99538	2.36521	1.0667e-31	3.22862e-31
EIF1AY	3.06663	1.4376	-1.62903	6.85583e-05	8.22325e-05
CYP2D7	2.36424	0.736357	-1.62788	1.69704e-39	1.08278e-38
SIRPA	3.53018	8.01466	4.48448	6.74216e-32	2.06283e-31
MYC	11.2878	22.5887	11.3009	1.1859e-24	2.60641e-24
ZNF558	3.61029	2.52921	-1.08108	2.94047e-29	7.87014e-29
NUDT8	7.85198	5.21668	-2.6353	1.02323e-18	1.85148e-18
SFI1	4.49657	1.99156	-2.50501	7.21955e-41	7.08225e-40
PSMD3	9.65839	12.0833	2.42491	8.06559e-15	1.30472e-14
STOM	10.3837	23.4476	13.0639	2.54241e-27	6.18956e-27
TMEM63B	6.42992	10.7963	4.36634	6.96092e-29	1.82703e-28
DCTN5	6.56542	4.20278	-2.36264	3.85104e-36	1.59065e-35
CRISP3	14.2561	3.44251	-10.8136	5.4308e-26	1.25353e-25
RACK1	66.477	40.8708	-25.6062	7.376e-30	2.02803e-29
HAP1	0.703822	1.86492	1.16109	1.03315e-15	1.71288e-15
ZNF446	2.81833	1.81136	-1.00697	2.59582e-28	6.6111e-28
TOMM20	8.42153	21.6127	13.1911	3.49624e-42	1.27247e-40
SGCB	2.56146	4.69838	2.13693	8.2224e-28	2.04391e-27
CCHCR1	5.38112	3.16915	-2.21197	3.18503e-25	7.14766e-25
NAMPT	19.3851	15.7246	-3.66054	8.50458e-07	1.08651e-06
FMOD	3.90947	6.42727	2.5178	6.79449e-09	9.29189e-09
SNHG17	7.19858	4.07066	-3.12791	2.70086e-32	8.4326e-32
MT-CYB	552.277	1123.52	571.239	7.2799e-25	1.61291e-24
MYL6	75.8122	25.9807	-49.8315	6.34731e-40	4.411e-39
TBL1X	3.17959	4.84907	1.66949	9.4211e-22	1.87009e-21
KIF2A	3.03643	4.4357	1.39927	6.13824e-28	1.53526e-27
TMEM184B	4.87738	10.9745	6.09717	7.71263e-42	1.69482e-40
AC025171.1	0.767545	2.02089	1.25334	4.32293e-33	1.41357e-32
ORMDL1	7.41837	4.47612	-2.94225	3.37227e-38	1.75045e-37
EPPK1	0.970285	4.2038	3.23352	1.7858e-31	5.33168e-31
CCSAP	1.30342	2.99534	1.69191	1.90559e-41	3.35561e-40
CEPT1	4.4196	2.32068	-2.09892	4.61025e-41	5.29333e-40
RABGGTA	13.8808	6.44404	-7.43677	2.90839e-36	1.21694e-35
MOB1B	2.09918	3.25705	1.15787	4.92204e-35	1.85599e-34
TAGLN2P1	0.607655	3.0951	2.48744	8.6747e-42	1.82935e-40
SCUBE2	2.15907	0.680225	-1.47884	2.03439e-31	6.06069e-31
TREX1	6.13996	0.000652444	-6.1393	1.5279e-42	1.16112e-40
CCDC134	1.38354	2.7837	1.40015	1.92713e-34	6.91983e-34
COX7A1	5.46213	2.92952	-2.53262	2.88909e-27	7.00583e-27
AC069282.1	1.9453	3.54765	1.60235	3.59419e-30	9.9973e-30
RSPO1	1.35559	0.0377822	-1.31781	3.10799e-42	1.21521e-40
IGLV6-57	1.51573	5.69981	4.18408	2.91923e-11	4.26964e-11
TMBIM4	9.34856	3.92876	-5.41979	7.14626e-38	3.54616e-37
RAP1B	9.73312	3.31468	-6.41845	5.37518e-39	3.11801e-38
CSTF2	4.29836	5.91577	1.61741	1.89003e-23	3.98498e-23
BIN1	3.95892	2.67763	-1.28129	2.48501e-16	4.19398e-16
SLMAP	6.29251	4.03519	-2.25732	8.61714e-33	2.77075e-32
AP003108.2	5.11179	0.0865626	-5.02523	2.61699e-41	4.04416e-40
KIF26B	0.201858	2.18722	1.98536	8.32196e-39	4.69864e-38
CDCA2	1.18834	3.45302	2.26469	4.22005e-38	2.15354e-37
RRP1B	3.09438	6.39727	3.30289	4.39098e-42	1.34399e-40
UNG	5.52325	8.70477	3.18152	2.33388e-31	6.92868e-31
AGO2	2.61733	4.97135	2.35402	7.99205e-39	4.53792e-38
HMGN2	25.8379	17.5961	-8.24178	4.32168e-23	8.99287e-23
UPK3B	7.83873	2.62559	-5.21314	3.64886e-20	6.89187e-20
TPM1	22.6005	5.98883	-16.6117	5.69123e-35	2.1312e-34
BAG5	4.03078	6.30877	2.27799	1.54177e-35	6.05844e-35
NDUFS3	11.6036	6.13473	-5.46883	1.51289e-39	9.76655e-39
PTOV1	11.7817	8.14689	-3.63482	5.99627e-31	1.73872e-30
AL445189.2	0.118829	1.94597	1.82715	6.98402e-41	6.88208e-40
NUP188	5.81379	9.40121	3.58742	2.60286e-35	1.00393e-34
DYNAP	4.5003	1.45241	-3.04789	4.9933e-24	1.07361e-23
MPZL1	8.75122	10.1948	1.4436	7.39747e-08	9.77345e-08
PGAP1	1.84501	3.15111	1.3061	7.25191e-23	1.49712e-22
TPBG	5.28585	6.97964	1.69379	4.51697e-08	6.00751e-08
CYCS	11.2352	13.6283	2.39307	1.03644e-06	1.31996e-06
JMJD7-PLA2G4B	4.07757	1.57304	-2.50452	3.95438e-40	2.90614e-39
GSTM5	2.33698	0.168707	-2.16827	1.66725e-41	3.00789e-40
ATF3	4.7761	6.26235	1.48625	6.1542e-06	7.6299e-06
CCNL1	12.9351	7.46394	-5.47114	1.66794e-30	4.72921e-30
SULT2B1	21.1401	8.53326	-12.6068	2.30368e-23	4.84041e-23
SLX4IP	1.34571	2.50088	1.15517	1.62594e-32	5.14522e-32
GNGT1	0.0154405	2.37662	2.36118	3.26902e-42	1.25096e-40
FAM120A	6.84826	17.1228	10.2745	1.84048e-42	1.16112e-40
APOO	3.6673	5.52025	1.85295	3.62104e-24	7.82849e-24
MICOS13	9.2916	6.27583	-3.01577	7.8723e-30	2.16224e-29
IMMP1L	3.78891	2.43963	-1.34927	2.35096e-31	6.97732e-31
COA1	5.44722	2.74737	-2.69985	5.53528e-41	5.8874e-40
CFH	6.84239	4.56959	-2.2728	2.08726e-16	3.52975e-16
BTNL9	3.23247	0.822238	-2.41023	6.60039e-33	2.13355e-32
GPR17	1.23688	0.192194	-1.04468	1.05673e-34	3.87147e-34
PHB2	17.732	24.1982	6.46618	9.36469e-17	1.59866e-16
TMEM245	3.07396	5.5538	2.47984	2.10107e-38	1.1206e-37
DPM2	6.28973	7.70079	1.41106	1.51603e-07	1.98316e-07
MLLT6	7.92602	6.09667	-1.82936	5.95179e-19	1.085e-18
RNF220	7.72495	3.75157	-3.97338	4.92591e-41	5.48518e-40
CSNK2A1	6.66343	9.1895	2.52607	1.12734e-23	2.39761e-23
SERPINB7	0.986232	2.94859	1.96236	5.13577e-08	6.81565e-08
ATG4B	9.54504	4.35832	-5.18673	3.04005e-41	4.26682e-40
VAMP3	9.03595	13.7417	4.70576	2.51218e-34	8.94405e-34
NGRN	6.70969	3.82068	-2.889	9.41018e-41	8.62476e-40
ATP6V1D	12.0785	6.1123	-5.96619	2.06596e-35	8.03167e-35
ING5	4.07787	2.28413	-1.79375	2.31212e-39	1.43198e-38
AC159540.2	2.54498	0.00573366	-2.53924	5.72261e-41	6.02244e-40
L3MBTL1	3.31503	1.04921	-2.26582	2.72069e-39	1.65889e-38
AC016394.1	1.57988	0.33474	-1.24514	5.11502e-34	1.77402e-33
FXR1	7.38991	6.32396	-1.06595	4.14391e-11	6.03067e-11
GABPA	2.72177	4.2762	1.55443	1.23665e-40	1.07766e-39
TMEM50B	6.02303	4.25641	-1.76662	1.72902e-29	4.66981e-29
JAM2	2.86167	1.28191	-1.57976	9.25047e-27	2.20371e-26
AC022400.7	1.15899	0.0115954	-1.1474	1.80983e-42	1.16112e-40
UPK1A	5.15416	1.19378	-3.96038	1.34405e-22	2.74736e-22
C18orf54	0.509453	1.75292	1.24347	6.92444e-38	3.44248e-37
TUBGCP2	6.76498	5.18352	-1.58146	1.89033e-27	4.62871e-27
VPS35L	4.63576	3.10373	-1.53202	1.22666e-27	3.02792e-27
LRRC15	0.186508	2.75794	2.57143	1.13874e-27	2.81469e-27
PIK3CA	2.56348	4.13837	1.57489	2.60365e-32	8.13626e-32
USP11	4.95075	7.59631	2.64556	9.0543e-29	2.3635e-28
SCNM1	6.64175	4.7398	-1.90195	4.71304e-32	1.45129e-31
B3GNT10	0.951942	2.27643	1.32449	8.68735e-29	2.27041e-28
RGS19	2.84839	5.20797	2.35958	1.3381e-34	4.86006e-34
ATP5PF	18.2855	12.8201	-5.46538	7.87649e-26	1.80855e-25
COX7A2	22.964	16.4083	-6.55568	3.05267e-29	8.16845e-29
GNPNAT1	2.68823	5.4136	2.72537	1.22454e-39	8.08046e-39
LMBR1L	7.79996	2.70209	-5.09787	6.98258e-41	6.88208e-40
ABCD4	6.87153	2.51675	-4.35478	7.21938e-41	7.08225e-40
HSPB7	3.78595	2.00764	-1.77831	3.48854e-17	6.02461e-17
CHST7	1.30498	3.41126	2.10628	1.1263e-22	2.30784e-22
KRT13	2278.07	128.478	-2149.59	6.99682e-47	7.6874e-43
SAA2	3.67781	1.63942	-2.0384	2.44506e-07	3.17427e-07
BMP8B	0.727716	1.86603	1.13831	1.37635e-23	2.91878e-23
IGHV3-15	1.9467	8.69417	6.74747	1.6105e-13	2.50738e-13
AC098934.3	0.611097	2.48092	1.86983	1.48843e-34	5.38827e-34
TXNDC16	1.19221	2.41973	1.22752	3.21974e-36	1.33896e-35
UBTD1	2.8375	5.03813	2.20063	6.17591e-34	2.13045e-33
CBFA2T2	2.86915	4.13373	1.26458	2.53855e-30	7.12233e-30
DLG5	5.12571	6.54625	1.42054	5.5677e-12	8.31503e-12
RPL23AP65	0.824154	3.01166	2.18751	5.2667e-41	5.6954e-40
LAG3	0.956154	2.00006	1.04391	3.31013e-08	4.42438e-08
GDE1	6.07966	7.97451	1.89484	9.04478e-26	2.06988e-25
TMEM218	4.25016	1.73624	-2.51392	7.46307e-41	7.23084e-40
FAM217B	1.64899	3.63038	1.98139	8.96998e-42	1.86667e-40
RXRB	6.88207	4.83187	-2.0502	4.71818e-37	2.12823e-36
EMP2	13.2602	9.81022	-3.45002	1.28123e-15	2.11778e-15
PEPD	7.4578	6.05757	-1.40023	3.51004e-14	5.56095e-14
AC018653.3	1.427	2.43109	1.00409	5.96324e-15	9.68486e-15
AXL	2.75565	5.3858	2.63015	3.27641e-22	6.6015e-22
NOC4L	4.3579	7.60821	3.25032	1.36076e-38	7.42428e-38
SASS6	1.25895	2.91228	1.65333	1.17117e-37	5.68863e-37
BUD23	7.53235	4.84924	-2.68311	4.03409e-36	1.66251e-35
PSAP	30.0092	83.2685	53.2593	2.66444e-40	2.05873e-39
TXNL4A	10.3194	4.62424	-5.69513	1.82278e-40	1.49186e-39
NGDN	6.29448	3.60211	-2.69237	1.90069e-37	8.99836e-37
RARG	15.3606	9.24657	-6.11403	2.05444e-28	5.26525e-28
LUC7L2	8.63991	4.49463	-4.14528	4.98104e-42	1.37192e-40
SLC52A1	0.827707	2.04235	1.21465	5.01088e-19	9.15592e-19
PPIG	5.56199	6.8274	1.26541	4.50085e-12	6.72984e-12
BYSL	3.6637	5.39832	1.73462	1.26896e-27	3.13093e-27
RPS18P9	1.41595	3.17006	1.75411	1.49588e-40	1.26134e-39
AC106886.2	1.75446	0.494969	-1.25949	1.43246e-33	4.80711e-33
MPP3	3.12681	2.12358	-1.00324	3.92478e-18	6.96632e-18
SCYL1	7.73445	9.49424	1.75979	5.91742e-18	1.04425e-17
SCAMP2	11.9841	9.51827	-2.46585	1.65274e-15	2.72448e-15
RERG	2.11864	1.03855	-1.08009	1.63836e-23	3.46567e-23
GOLT1B	3.902	7.37882	3.47682	2.05417e-41	3.54303e-40
MAP7	3.98736	6.22143	2.23407	2.02808e-21	3.98542e-21
ANKRD52	3.16388	5.93848	2.77461	1.2781e-37	6.18123e-37
GPD1L	5.45957	3.62321	-1.83635	4.66136e-19	8.53004e-19
ANKIB1	3.15864	7.13566	3.97702	1.69132e-42	1.16112e-40
NOP10	16.8835	25.9882	9.10462	3.28846e-21	6.41519e-21
TMEM30B	3.63326	7.05496	3.4217	1.05675e-34	3.87147e-34
N4BP3	3.69997	2.18636	-1.51361	1.71623e-20	3.28048e-20
PAX8-AS1	8.03077	1.75538	-6.27539	3.25956e-23	6.81759e-23
CKMT1A	10.9429	2.94472	-7.99823	6.49547e-38	3.24419e-37
FCHSD2	2.50883	4.35011	1.84128	3.14531e-36	1.31202e-35
TMEM33	4.3943	6.03632	1.64203	8.9148e-19	1.61629e-18
CRCP	3.89085	5.71202	1.82117	1.17649e-35	4.66065e-35
ZNF580	5.08587	6.45807	1.3722	2.64016e-12	3.9758e-12
WDR5B	1.18955	2.39934	1.20978	2.29442e-34	8.2034e-34
PCTP	3.13905	1.86824	-1.27081	2.49094e-33	8.24832e-33
SLC38A7	2.60624	4.12999	1.52375	4.53322e-34	1.5782e-33
SMIM26	9.16049	7.56857	-1.59192	2.27476e-14	3.62837e-14
SCCPDH	1.94056	4.38393	2.44337	8.80795e-29	2.30138e-28
PKN2	4.73294	5.99162	1.25869	7.39795e-14	1.16266e-13
ZNF865	2.51044	5.54984	3.03941	2.76152e-42	1.2068e-40
SMTNL2	1.2404	0.184804	-1.0556	1.41779e-36	6.12795e-36
SAA1	6.84766	13.2945	6.44687	0.000290953	0.000341856
DCUN1D5	5.2513	8.02679	2.77549	5.82153e-19	1.0623e-18
ITPKB	3.25719	5.48627	2.22908	1.18447e-30	3.38282e-30
ACLY	5.90494	13.487	7.58206	3.03962e-40	2.3064e-39
MLEC	5.02351	9.76173	4.73822	2.13163e-39	1.32923e-38
RHOT2	12.921	6.1491	-6.77186	4.53218e-41	5.26093e-40
ENDOD1	4.58399	7.47576	2.89177	1.96011e-20	3.7382e-20
PCDHB11	0.353719	1.70045	1.34674	1.21731e-21	2.40767e-21
HSP90AB1	30.6517	154.498	123.847	1.62697e-42	1.16112e-40
TMEM185B	3.01989	9.1307	6.11081	3.05595e-42	1.21521e-40
AC073569.2	0.104593	2.3665	2.26191	1.34127e-41	2.54093e-40
B4GALNT4	2.10921	3.49106	1.38185	0.000442173	0.000516112
CACNB2	1.70343	0.597646	-1.10579	3.15304e-29	8.43293e-29
GLTP	23.3573	21.5517	-1.8056	2.71999e-05	3.3069e-05
RPL22	34.471	13.9118	-20.5592	3.72326e-39	2.21241e-38
TRIM11	4.52393	3.36864	-1.15528	1.60767e-27	3.9498e-27
TBPL1	4.36724	2.72532	-1.64192	1.92335e-38	1.03087e-37
SNX14	6.03192	3.95999	-2.07193	2.08243e-35	8.0904e-35
LGALS7	22.2356	13.3128	-8.9228	6.14597e-05	7.38633e-05
RPL39P3	29.0912	19.6046	-9.48662	9.31087e-17	1.58972e-16
GIT1	6.14553	9.89099	3.74546	2.2838e-31	6.78715e-31
CBWD1	5.78415	1.01701	-4.76714	3.41705e-41	4.53967e-40
ZDHHC11	3.64373	1.07232	-2.57141	1.32794e-30	3.78669e-30
AC100814.1	1.11921	2.1417	1.02249	1.92256e-16	3.25273e-16
CCDC180	1.05972	0.0139195	-1.0458	3.55711e-42	1.28138e-40
CANX	14.4682	30.3585	15.8904	1.16705e-38	6.46612e-38
LYPD3	46.8773	38.8146	-8.06271	1.37797e-06	1.74482e-06
FNDC3B	2.12385	6.68804	4.56419	4.68773e-41	5.34313e-40
DVL3	6.65245	17.9378	11.2853	1.9363e-42	1.16112e-40
RAI1	3.93742	7.01962	3.08219	2.20975e-37	1.03577e-36
AL157392.3	4.7976	0.722844	-4.07475	3.77559e-41	4.79641e-40
ARHGEF10L	7.48115	3.45636	-4.02478	1.004e-36	4.39655e-36
ITSN1	3.27986	1.67361	-1.60626	1.32864e-39	8.67404e-39
IFT27	3.81957	1.98358	-1.836	4.01709e-39	2.37545e-38
LAPTM4A	16.8003	38.7256	21.9253	2.25157e-42	1.16112e-40
PPP1R13B	5.80018	4.37125	-1.42893	4.40898e-19	8.0831e-19
C22orf39	4.4023	2.44262	-1.95968	1.67895e-40	1.3924e-39
CAPN5	6.36625	2.51143	-3.85481	8.04921e-31	2.31813e-30
STAG3L1	2.0665	0.250541	-1.81595	1.07451e-40	9.64517e-40
TGFBR1	3.00727	6.44897	3.4417	3.36027e-41	4.48638e-40
HERC2P4	2.13059	0.104371	-2.02622	1.14093e-35	4.52542e-35
LRG1	4.43622	3.01155	-1.42467	2.57649e-05	3.13452e-05
TNRC18	5.75378	10.6293	4.87553	5.00957e-41	5.527e-40
ABCA10	2.63856	0.215572	-2.42299	6.2182e-41	6.31425e-40
DDX50	4.26946	6.3021	2.03264	2.89591e-38	1.51956e-37
TTC4	3.88915	0.980181	-2.90897	3.19676e-41	4.41247e-40
HSD17B10	12.1499	14.4426	2.29267	2.44464e-07	3.17427e-07
HPS6	3.04231	4.27931	1.237	3.88583e-26	9.01566e-26
ZNF213-AS1	3.07088	1.63988	-1.431	2.67216e-37	1.24035e-36
WIPI2	7.15461	5.04211	-2.11251	5.47763e-35	2.05599e-34
BANF1	14.1686	22.032	7.86349	1.57757e-23	3.34094e-23
PMEPA1	2.35206	11.6073	9.25519	3.55685e-39	2.11811e-38
ABCA5	5.34827	1.89995	-3.44832	1.40005e-40	1.19247e-39
ITSN2	7.23142	4.32293	-2.90849	1.50946e-33	5.05778e-33
PARP4	4.84073	6.93281	2.09207	4.72489e-16	7.92676e-16
PSMA2	11.9735	3.76081	-8.21272	5.53232e-41	5.8874e-40
RPS7P10	0.984383	3.07211	2.08773	2.91708e-40	2.22724e-39
MMP2	11.8032	25.0409	13.2377	4.24913e-09	5.84661e-09
ARRDC4	2.54451	5.79081	3.2463	5.70911e-23	1.18396e-22
CISD3	5.29827	3.88502	-1.41325	1.50117e-24	3.28487e-24
CHAF1B	1.40678	2.92959	1.52281	5.8836e-37	2.62356e-36
DDX6	5.23779	6.48427	1.24648	1.09172e-15	1.8078e-15
RNGTT	2.18784	3.89752	1.70968	3.25043e-41	4.42545e-40
ATF5	4.13743	6.54194	2.40452	1.83523e-15	3.02124e-15
SLCO4A1	5.17973	2.95968	-2.22005	1.5014e-16	2.54723e-16
BABAM1	8.16215	5.90672	-2.25543	3.80906e-34	1.34049e-33
CES4A	3.64933	1.0205	-2.62883	2.70867e-40	2.08853e-39
AL354740.1	3.20198	0.0185996	-3.18338	3.86982e-42	1.30032e-40
CPOX	4.13209	5.59999	1.4679	4.28789e-19	7.86758e-19
PGA5	1.89422	0.188472	-1.70574	8.27229e-30	2.26822e-29
IARS2	6.83426	13.6545	6.8202	4.84541e-41	5.43883e-40
AARS2	2.83642	3.91089	1.07448	9.33194e-21	1.79751e-20
NDOR1	3.23859	5.24476	2.00616	1.71193e-32	5.40694e-32
AKT2	10.4423	4.52538	-5.9169	2.68156e-41	4.08936e-40
EP300	3.978	8.96941	4.99141	2.10734e-42	1.16112e-40
MN1	1.44966	4.0538	2.60414	3.24211e-29	8.66061e-29
DDIAS	1.375	2.83425	1.45926	4.3455e-26	1.00598e-25
ACAP3	10.9303	5.08001	-5.85025	2.66392e-40	2.05873e-39
LINC00519	0.608732	3.33533	2.7266	4.68773e-25	1.04704e-24
HCCS	4.32315	5.43017	1.10702	2.31354e-12	3.49161e-12
TCEAL3	5.77017	3.3256	-2.44457	3.6589e-21	7.12772e-21
CMTM8	1.69908	3.82262	2.12354	2.92627e-30	8.17674e-30
MOB3B	1.4325	2.47897	1.04646	1.2273e-12	1.86895e-12
NEK3	2.64913	1.34072	-1.30841	5.01683e-36	2.05288e-35
SEMA3B	3.63262	1.93315	-1.69948	6.29848e-23	1.30372e-22
PCF11	7.73556	3.07688	-4.65869	2.70553e-41	4.10065e-40
ARPC1B	9.35604	16.1624	6.80638	3.97472e-16	6.67638e-16
GARNL3	2.15062	0.537842	-1.61278	4.53455e-41	5.26093e-40
PFN1P1	0.447985	4.69951	4.25152	5.99496e-42	1.435e-40
NDC80	2.08122	4.09115	2.00994	1.46143e-29	3.96559e-29
AL133260.1	0.47156	2.14371	1.67215	1.09231e-39	7.26903e-39
BST1	1.79442	0.664309	-1.13011	7.56472e-29	1.98227e-28
SEC61A1	12.1774	24.9783	12.8008	2.33082e-38	1.23594e-37
AC126755.1	5.88952	1.02649	-4.86302	2.44819e-41	3.87584e-40
NECAP2	7.24365	5.01132	-2.23233	1.49966e-34	5.42442e-34
STEAP1	3.70998	6.53905	2.82907	1.76252e-18	3.1668e-18
ALOX15B	7.14249	3.22874	-3.91376	6.62051e-22	1.32015e-21
FGF19	0.0045696	3.70421	3.69964	3.97124e-35	1.50819e-34
TMOD1	2.3754	1.14199	-1.23341	4.8465e-19	8.86293e-19
LAMP2	9.96695	17.3825	7.41552	1.26119e-35	4.98802e-35
AC010343.1	1.96747	6.13627	4.16881	5.41933e-42	1.38472e-40
UBA1	15.2506	21.7714	6.52083	2.41639e-31	7.16569e-31
RARA	3.44193	4.89412	1.45219	7.00852e-24	1.50073e-23
ENTPD7	1.86264	4.80708	2.94444	2.37418e-40	1.8687e-39
IFI27L1	4.18554	2.4578	-1.72774	3.10707e-20	5.88294e-20
AQP3	66.718	26.5783	-40.1397	1.98858e-23	4.18795e-23
METTL7A	6.09847	4.66591	-1.43256	1.57743e-09	2.19633e-09
RGPD6	3.02131	0.00574366	-3.01556	1.66298e-42	1.16112e-40
RCOR1	5.78745	7.82367	2.03623	6.97093e-12	1.0385e-11
MRPS11	7.03606	2.83503	-4.20103	5.44394e-41	5.83018e-40
SNORD22	2.42965	0.000652444	-2.429	1.52808e-42	1.16112e-40
METTL18	1.94434	2.96051	1.01616	4.34036e-31	1.26964e-30
RNF207	5.30582	1.90735	-3.39847	4.21986e-38	2.15354e-37
RP2	2.71016	4.1704	1.46024	6.67313e-27	1.59838e-26
PIP4K2C	5.33083	9.09193	3.7611	2.4134e-40	1.89437e-39
RPL17P50	0.370516	1.81826	1.44774	3.65396e-38	1.87862e-37
GIMAP1-GIMAP5	1.1366	0.000652444	-1.13595	1.52808e-42	1.16112e-40
TRAPPC13	3.53349	2.14771	-1.38577	5.04011e-39	2.93628e-38
GSKIP	5.66668	4.34147	-1.32521	6.72399e-19	1.22434e-18
TANC2	2.2118	3.43523	1.22343	4.48324e-19	8.21375e-19
RIOX1	2.09162	4.11157	2.01995	1.22448e-39	8.08046e-39
NSUN5P1	6.97763	2.56614	-4.41149	2.04689e-40	1.65118e-39
TNNT2	3.07661	0.730897	-2.34572	2.16161e-33	7.1751e-33
RPA1	6.12945	9.56724	3.43779	5.32212e-33	1.73073e-32
LHPP	4.93429	3.77903	-1.15526	2.47274e-18	4.42496e-18
TMCC3	1.92914	3.04457	1.11542	1.79066e-12	2.71329e-12
ACTL6A	6.16139	10.7839	4.62252	4.99786e-35	1.8833e-34
HLA-B	32.9257	89.2367	56.311	3.22087e-17	5.56936e-17
SNRPA	8.53746	11.0546	2.51719	8.95734e-21	1.72626e-20
PPIAP29	1.53564	4.68511	3.14946	4.09857e-36	1.68782e-35
MAN1B1-DT	0.809617	1.97322	1.16361	2.66518e-27	6.47983e-27
AC017116.1	2.68196	0.000652444	-2.68131	1.5281e-42	1.16112e-40
SRP14	23.282	25.3634	2.08136	0.0115812	0.0128036
CES3	2.04523	0.968417	-1.07681	6.66725e-16	1.11293e-15
FXYD3	37.0525	35.804	-1.24844	0.00144305	0.00165568
CSTF2T	2.63241	3.97398	1.34157	1.67627e-33	5.60475e-33
IFIH1	2.50118	5.49363	2.99245	8.89828e-31	2.55796e-30
ST3GAL1	3.75128	5.28465	1.53337	5.2073e-08	6.90816e-08
PLAA	3.77004	4.89657	1.12653	7.42844e-19	1.35037e-18
SEC11C	7.95542	2.97745	-4.97796	5.35424e-41	5.74538e-40
ITPR3	4.52532	13.6707	9.14541	1.50781e-41	2.80815e-40
TPT1P9	1.22546	4.21809	2.99263	7.97499e-41	7.5666e-40
EIF6	21.4475	23.0804	1.6329	0.0178501	0.019563
AP006621.4	2.21407	0.940968	-1.2731	4.66072e-23	9.69103e-23
TCEA3	6.6515	3.85244	-2.79906	2.217e-28	5.6713e-28
AF001548.2	1.57517	3.25406	1.67889	7.05849e-29	1.85177e-28
ATXN7L3B	3.52552	7.04423	3.51871	5.79533e-42	1.41517e-40
PLCB2	2.75332	1.07259	-1.68073	1.49829e-33	5.02188e-33
FBXL16	4.14552	2.10457	-2.04095	3.85789e-21	7.50738e-21
GATM	3.94066	2.43273	-1.50793	2.67972e-17	4.644e-17
PYCR3	2.4569	4.16597	1.70907	1.85654e-30	5.24644e-30
SEC24B	4.00014	6.61605	2.61591	2.09699e-39	1.30998e-38
SFRP2	9.74272	24.38	14.6373	3.56295e-08	4.75594e-08
KREMEN1	5.79714	0.000652444	-5.79649	1.5279e-42	1.16112e-40
TEX261	5.98016	10.2344	4.25423	1.54578e-40	1.29467e-39
DPH7	6.08178	3.16394	-2.91784	1.62438e-40	1.35324e-39
PPM1H	0.313486	1.51052	1.19703	4.97103e-16	8.33462e-16
MEIS3	2.44738	1.3826	-1.06479	3.11879e-15	5.1052e-15
KDM5D	3.73485	1.45372	-2.28114	9.73611e-07	1.24139e-06
TSTA3	12.839	8.25273	-4.58625	3.72284e-30	1.03499e-29
CU634019.6	1.11775	0.0290139	-1.08874	4.31388e-41	5.11842e-40
TSN	4.99257	9.13822	4.14565	8.24784e-42	1.77012e-40
EIF4EBP1	12.2052	29.9495	17.7444	4.8678e-28	1.2233e-27
SMDT1	11.3992	6.818	-4.58117	4.68374e-39	2.74748e-38
TCF12	3.90976	5.79186	1.8821	5.1532e-35	1.93729e-34
DEDD2	5.06535	6.36282	1.29747	9.33249e-15	1.50678e-14
FEN1	3.51302	7.78269	4.26966	2.99943e-39	1.80772e-38
SRRM3	3.76484	2.18359	-1.58125	6.83517e-24	1.46447e-23
ADAM19	1.82684	3.39555	1.56871	1.02351e-17	1.79666e-17
SGSH	5.43895	3.54032	-1.89863	3.0487e-36	1.2727e-35
INSR	1.853	3.67674	1.82375	2.50693e-38	1.32489e-37
ZMYM3	3.10989	4.59164	1.48176	2.79358e-27	6.78605e-27
SNRPEP4	3.7946	2.59472	-1.19987	1.31486e-20	2.5225e-20
GAST	0.0500675	2.39414	2.34407	9.69924e-33	3.10777e-32
ORMDL2	9.42434	5.07821	-4.34612	3.33361e-37	1.53088e-36
RPS12P23	0.204914	1.57751	1.3726	3.44146e-37	1.57679e-36
SERF2	47.9652	11.0886	-36.8765	4.90354e-41	5.48518e-40
KCTD5	5.84536	7.12657	1.28121	2.67616e-14	4.25822e-14
NUDT22	7.79686	3.14747	-4.64939	3.47372e-41	4.55544e-40
SMC1A	4.25244	6.96095	2.70851	8.27829e-35	3.05624e-34
AP4M1	4.30267	2.9914	-1.31127	1.38895e-28	3.59004e-28
ELK4	2.66921	5.06323	2.39401	2.10643e-41	3.60515e-40
ACAT1	6.11401	3.27892	-2.83509	4.28589e-39	2.525e-38
BMS1P10	3.4124	0.22396	-3.18844	1.48951e-39	9.63229e-39
ASB3	2.83434	0.729454	-2.10489	8.10841e-41	7.64696e-40
PEX19	5.17165	6.62422	1.45258	4.37922e-27	1.055e-26
PCSK1N	0.572401	3.61664	3.04424	1.8515e-18	3.325e-18
KALRN	4.48337	0.569288	-3.91409	3.14401e-41	4.3781e-40
ZNF44	2.71918	1.65273	-1.06645	1.00942e-34	3.70698e-34
AHCYL1	6.89187	10.2884	3.39652	4.94076e-33	1.61033e-32
PRUNE1	3.46759	5.92137	2.45378	1.22652e-40	1.07047e-39
FKBP14	1.90749	3.7499	1.84241	1.18466e-34	4.31988e-34
DHRS7B	4.15603	2.38775	-1.76828	3.84335e-37	1.74997e-36
ARFGEF2	3.13229	6.1643	3.032	4.73646e-42	1.35885e-40
SLC25A36	4.72068	6.9529	2.23221	1.77976e-16	3.01531e-16
DNAJB6	13.0885	4.67106	-8.41745	5.91259e-41	6.12011e-40
MT-TY	0.0409493	5.31884	5.27789	4.98141e-42	1.37192e-40
CBFB	4.83461	8.06003	3.22542	2.06379e-40	1.66238e-39
ELOC	9.65693	5.57014	-4.08679	6.57396e-40	4.55985e-39
DNA2	1.28099	2.51792	1.23693	1.86949e-34	6.72563e-34
AC010327.5	1.18847	0.0675087	-1.12096	6.98334e-41	6.88208e-40
NPTXR	0.840961	2.62221	1.78125	1.95242e-16	3.30274e-16
RNVU1-18	2.01707	0.0846147	-1.93245	1.50949e-36	6.50128e-36
ARNTL2	5.1061	7.85634	2.75023	3.72884e-08	4.97315e-08
PGD	34.1354	32.2792	-1.85613	0.00032823	0.000384833
GULP1	3.52164	1.42545	-2.09619	1.9376e-30	5.46979e-30
TMED3	14.9578	3.00584	-11.952	2.52951e-41	3.96184e-40
AC005261.5	0.603787	3.18589	2.58211	5.35456e-41	5.74538e-40
RAD51AP1	1.85191	5.14642	3.29451	5.86373e-40	4.11924e-39
PTPN11	4.55787	9.09042	4.53255	3.61719e-42	1.28321e-40
ZNF12	3.37151	4.8785	1.507	2.33394e-31	6.92868e-31
PMM2	5.66214	2.43312	-3.22902	3.44533e-41	4.55544e-40
ARHGEF25	4.78655	2.4781	-2.30844	1.61864e-27	3.97497e-27
PJA2	5.24541	9.92634	4.68092	2.04652e-39	1.28198e-38
B3GLCT	1.37918	2.75316	1.37398	1.85622e-37	8.80242e-37
GTF3C2	8.51152	7.19212	-1.3194	1.72239e-06	2.17391e-06
DNASE1L3	3.63331	1.64069	-1.99262	3.44548e-20	6.51557e-20
RGPD5	1.74661	0.00509781	-1.74151	1.72035e-42	1.16112e-40
MTND4LP30	0.185824	2.75675	2.57093	4.50326e-42	1.35192e-40
FAM91A1	3.98467	7.43263	3.44796	7.33986e-41	7.1499e-40
UQCRH	24.8222	22.5636	-2.25858	1.94498e-07	2.53493e-07
USP39	5.6972	7.54448	1.84728	6.15072e-26	1.41702e-25
FMO3	2.08495	0.781498	-1.30345	8.14879e-32	2.48145e-31
FAAH	4.24977	3.00338	-1.24639	2.10741e-19	3.89668e-19
PPIL2	6.69592	4.32424	-2.37167	3.08043e-37	1.42057e-36
COMMD2	3.6779	5.88672	2.20882	1.19371e-34	4.35002e-34
MAL	109.748	15.9019	-93.8464	8.22304e-30	2.25641e-29
NAGA	3.6916	6.37008	2.67848	2.36768e-41	3.8426e-40
ZAP70	1.94585	0.728192	-1.21766	1.19368e-24	2.62299e-24
PLCH2	6.96873	2.99067	-3.97806	2.17579e-34	7.78679e-34
TMPO-AS1	0.552713	1.89451	1.34179	1.50944e-36	6.50128e-36
FBXL19	4.25436	5.47068	1.21632	9.09698e-18	1.59922e-17
AC234781.5	1.0775	0.00716769	-1.07033	3.01495e-38	1.57814e-37
NDUFA11	23.3462	3.78777	-19.5585	4.90539e-41	5.48518e-40
RGL2	11.9022	6.36753	-5.53464	1.4229e-40	1.21002e-39
CCT8	11.9461	15.1034	3.15724	2.37459e-14	3.78605e-14
GPX2	16.1925	64.3278	48.1353	0.000174557	0.000206778
SUDS3	4.45669	5.68398	1.22729	3.44271e-24	7.44588e-24
NDUFC1	10.8191	7.32849	-3.4906	1.1211e-28	2.9147e-28
MTCO1P53	0.0308876	2.7591	2.72821	5.32839e-42	1.38094e-40
TNFAIP8	4.37867	2.90893	-1.46974	4.54957e-26	1.05175e-25
AC138969.1	16.2687	0.0997636	-16.1689	1.96925e-41	3.42559e-40
AL392089.1	1.94657	0.0161353	-1.93043	5.32885e-42	1.38094e-40
LCN6	2.67142	0.0419169	-2.6295	4.50354e-42	1.35192e-40
XIST	7.52725	0.830518	-6.69674	1.33956e-27	3.30069e-27
COL6A2	18.878	42.8259	23.9479	4.92599e-08	6.54119e-08
RCC2	8.56994	22.3573	13.7874	3.10718e-42	1.21521e-40
DHTKD1	2.62324	5.137	2.51376	3.24009e-38	1.68715e-37
CD3D	1.76301	2.78602	1.02301	3.27323e-06	4.08855e-06
MAP3K8	4.63388	3.17489	-1.45898	8.99161e-17	1.5357e-16
SOX15	10.1838	17.1485	6.96477	3.20862e-16	5.40194e-16
PRPF4	3.89851	7.51231	3.61379	9.89134e-41	8.95929e-40
YRDC	3.83048	5.35061	1.52012	6.39409e-28	1.59736e-27
TET3	2.55089	5.23551	2.68462	9.92673e-36	3.96168e-35
CCT7	13.5089	19.4534	5.9445	7.77134e-29	2.03488e-28
ZBTB17	6.33388	4.3594	-1.97447	6.60144e-30	1.81927e-29
CCDC120	6.69406	4.29547	-2.39858	9.60957e-23	1.97273e-22
RPS19BP1	10.9802	4.85171	-6.1285	4.17062e-41	4.99399e-40
DHX34	3.58254	5.34956	1.76703	1.35563e-31	4.07504e-31
RIC3	3.53409	0.365224	-3.16887	1.78238e-41	3.17922e-40
SPINK5	46.176	16.3598	-29.8162	1.74042e-23	3.67873e-23
PLXNA1	3.62745	13.0388	9.41136	6.85709e-42	1.55999e-40
RNU6-850P	0.00657742	2.18427	2.1777	1.77933e-42	1.16112e-40
XRCC6	17.7422	27.2267	9.48451	4.15708e-33	1.36137e-32
GPT2	10.1839	4.96447	-5.21945	7.10665e-29	1.86395e-28
TXNDC5	8.07361	2.01005	-6.06357	4.17244e-41	4.99399e-40
MARVELD1	4.29086	11.2989	7.00803	5.39527e-37	2.4195e-36
DCBLD1	2.50277	3.98951	1.48674	7.2053e-09	9.8439e-09
TMEM14C	10.0638	15.4509	5.38711	1.17576e-30	3.35883e-30
XIAP	3.51957	5.05349	1.53392	5.65195e-30	1.56221e-29
FCGR3A	1.27435	5.35466	4.08032	7.14735e-32	2.18315e-31
AC012618.1	0.0416932	2.93772	2.89603	4.73628e-42	1.35885e-40
GAS5	32.2956	12.5235	-19.7721	4.95988e-40	3.5478e-39
CNKSR1	6.71407	4.43771	-2.27636	3.1317e-24	6.78124e-24
SH3BP5-AS1	2.79814	1.12039	-1.67775	5.88341e-37	2.62356e-36
C1QTNF7	1.19607	0.128821	-1.06725	5.83129e-39	3.35964e-38
GOLGB1	4.96053	7.75349	2.79296	5.14211e-27	1.235e-26
AC023509.1	2.16649	0.0149243	-2.15157	4.20997e-42	1.3369e-40
TUT4	5.25984	2.94792	-2.31192	9.83183e-38	4.8074e-37
TRAF7	8.11902	14.1305	6.01151	3.01338e-40	2.2928e-39
BOP1	5.99901	10.301	4.30202	8.27584e-29	2.16389e-28
MAMDC4	2.74889	1.19121	-1.55768	2.15588e-30	6.0735e-30
PHKG2	5.60776	3.05445	-2.55331	1.3545e-40	1.16181e-39
GPRC5B	2.88301	1.85883	-1.02417	1.10039e-14	1.77117e-14
ATP13A2	5.37448	8.17269	2.79821	1.64064e-27	4.02719e-27
PABPC1P4	0.518914	2.14653	1.62761	4.38602e-41	5.15945e-40
SH3BP5	4.21231	1.23139	-2.98092	1.85395e-40	1.51445e-39
PRICKLE4	2.33841	0.209938	-2.12848	2.53136e-41	3.96184e-40
GPR180	0.957496	2.53562	1.57813	6.41123e-42	1.49241e-40
AC025575.2	0.0922101	2.32765	2.23544	5.36887e-23	1.11424e-22
MYL9	41.4289	30.0412	-11.3877	2.85141e-15	4.67239e-15
AC023157.2	0.55703	2.54433	1.9873	4.58927e-27	1.10457e-26
PHLDB2	3.20864	5.60187	2.39323	8.9917e-17	1.5357e-16
BAIAP2	14.5462	6.52792	-8.01825	6.81082e-38	3.3906e-37
TES	6.57412	8.47654	1.90242	7.4126e-10	1.04216e-09
AP002026.1	1.84676	0.583801	-1.26296	3.45936e-35	1.31698e-34
IGLV3-27	0.73438	1.84422	1.10984	0.00236823	0.0026905
MMP7	1.78339	6.26841	4.48503	5.99252e-15	9.73097e-15
PAK1IP1	3.92832	6.56373	2.63542	1.37978e-33	4.63622e-33
IGHV4-61	1.32962	2.57822	1.2486	0.00088423	0.00102156
JOSD1	4.83812	9.17241	4.33429	3.65189e-41	4.71018e-40
RPL21P75	0.477191	2.0682	1.59101	2.72629e-35	1.04954e-34
CRELD2	6.08988	4.1528	-1.93708	1.61199e-29	4.36263e-29
LINC00997	0.974915	2.34003	1.36511	1.39502e-37	6.71065e-37
TCF21	2.36094	0.454056	-1.90688	4.50068e-37	2.0341e-36
AC009120.2	3.1813	1.23703	-1.94427	4.08696e-38	2.0895e-37
LRRK2	2.28734	0.872626	-1.41472	2.24761e-28	5.74557e-28
CAMTA2	7.45033	5.31971	-2.13063	2.98767e-27	7.24146e-27
COPS3	7.42773	9.21422	1.78649	2.22888e-19	4.12014e-19
AP002387.2	1.37446	3.98389	2.60943	5.33048e-25	1.18723e-24
SLC40A1	2.87762	5.86913	2.99152	2.50913e-21	4.91054e-21
SPC24	1.86874	3.11821	1.24946	3.07303e-24	6.65813e-24
UXT	12.8412	11.128	-1.71318	4.36869e-10	6.17905e-10
NDUFS1	6.38563	4.80344	-1.58218	5.85367e-19	1.06768e-18
ALDH2	14.5266	4.92148	-9.60507	5.9568e-40	4.17419e-39
RPL37A	202.031	23.081	-178.95	2.39326e-41	3.856e-40
HOXA4	3.86715	2.18182	-1.68533	2.80683e-33	9.27218e-33
AC024592.2	2.15914	0.345276	-1.81386	4.94255e-30	1.36854e-29
UBE2Q2	3.77472	7.89662	4.1219	2.89232e-41	4.19275e-40
TPRG1	8.02986	2.21178	-5.81808	8.031e-32	2.44633e-31
DICER1-AS1	1.8118	0.658786	-1.15301	5.33858e-36	2.17977e-35
TMED8	1.51808	3.57773	2.05965	2.71511e-42	1.20298e-40
ARHGAP40	5.30031	1.03045	-4.26986	2.06683e-33	6.86887e-33
TMTC2	3.33315	2.15543	-1.17773	3.06642e-26	7.14696e-26
POLE	4.76995	3.71421	-1.05574	6.1877e-19	1.12762e-18
AL133230.1	0.267571	2.70248	2.43491	6.29234e-38	3.14961e-37
MIR4435-2HG	4.67198	2.33395	-2.33803	8.53498e-34	2.91969e-33
NOP56	15.6682	9.9618	-5.70641	2.89567e-28	7.356e-28
DHRS11	4.13022	2.05541	-2.07481	2.67007e-34	9.49138e-34
SMARCB1	7.72441	12.1334	4.40899	6.88997e-35	2.55731e-34
MTMR9LP	2.6277	0.96231	-1.66539	7.80983e-37	3.45576e-36
PYROXD2	2.26057	1.07117	-1.1894	5.46166e-27	1.31049e-26
AC002075.2	0.318098	2.47009	2.15199	8.38837e-42	1.79308e-40
PIK3C3	5.57801	2.08659	-3.49142	3.65203e-41	4.71018e-40
IGF1	1.50709	0.134081	-1.37301	2.29522e-38	1.21766e-37
POLDIP3	6.7871	9.74082	2.95372	1.34225e-32	4.26591e-32
RPLP2	55.5331	71.0278	15.4947	4.75964e-07	6.12272e-07
LAMB2	18.8232	8.25143	-10.5718	4.66325e-35	1.76187e-34
ORC3	2.8639	4.93158	2.06768	1.85375e-40	1.51445e-39
ATP6V1B2	7.87692	5.6762	-2.20071	2.91959e-29	7.81806e-29
S100A7	61.6948	242.947	181.252	3.18592e-12	4.7865e-12
OASL	1.34327	4.64258	3.29931	9.24363e-20	1.72398e-19
TULP3	4.27197	6.2474	1.97542	7.04315e-32	2.15212e-31
NCK1-DT	1.17394	2.51984	1.34589	5.38561e-31	1.56712e-30
WDR89	1.84217	3.11483	1.27266	6.47741e-39	3.7047e-38
FAM160B2	10.5892	5.1876	-5.4016	7.52322e-41	7.2762e-40
AL022718.1	0.0433149	10.8148	10.7715	3.55649e-42	1.28138e-40
SMAGP	13.6655	4.7422	-8.92326	5.15193e-35	1.93729e-34
FAM136A	5.44085	6.71837	1.27752	5.6422e-16	9.43975e-16
RPLP1	99.0812	90.5958	-8.48539	0.000336501	0.000394236
SKI	4.98613	9.95071	4.96458	2.07149e-41	3.56209e-40
GUF1	3.27997	5.87197	2.592	3.25292e-39	1.95097e-38
GPRC5C	3.86866	2.38414	-1.48451	6.88105e-18	1.21332e-17
FARSA	6.78686	10.7453	3.95846	6.91354e-34	2.37919e-33
ARL3	1.95045	3.30489	1.35444	4.1406e-34	1.45072e-33
ASCL2	0.96566	2.81983	1.85417	3.25373e-26	7.57871e-26
TMEM107	3.49133	2.44178	-1.04955	2.89093e-21	5.6487e-21
RPL10P9	4.34932	10.9061	6.55683	4.12781e-17	7.1152e-17
SNN	3.94556	5.80737	1.86181	1.82905e-28	4.69661e-28
SMG1P7	2.58123	0.639575	-1.94166	9.72923e-41	8.84225e-40
WBP1L	4.48162	5.6554	1.17378	5.90498e-15	9.59166e-15
FHDC1	2.36853	4.36261	1.99408	4.30379e-14	6.79393e-14
MAGI1	3.87618	2.01725	-1.85892	8.66572e-22	1.72202e-21
TEC	2.44252	0.72574	-1.71678	1.3947e-35	5.49839e-35
ARPC5	13.2381	7.51455	-5.72355	2.55493e-40	1.98654e-39
SFXN1	4.12044	5.23286	1.11241	4.85866e-08	6.45412e-08
ZNRF1	9.08848	3.48214	-5.60635	1.48338e-40	1.25368e-39
CIC	6.31074	8.81535	2.50462	3.6868e-26	8.56201e-26
CEP19	0.825043	2.28958	1.46453	1.15965e-26	2.75127e-26
CLDN7	25.352	9.74168	-15.6103	2.96125e-35	1.13521e-34
YWHAB	14.261	33.073	18.812	2.2135e-42	1.16112e-40
AC005833.1	1.66987	0.00145237	-1.66842	6.97388e-42	1.56695e-40
DBF4	2.34023	4.26952	1.9293	2.67758e-31	7.91475e-31
PHF7	2.30502	1.24744	-1.05758	8.42769e-33	2.71222e-32
AC026436.1	0.533436	1.81865	1.28521	9.83609e-31	2.82165e-30
GNL3L	1.83728	6.38042	4.54314	3.86982e-42	1.30032e-40
LIG4	1.95128	3.07098	1.1197	3.624e-29	9.64615e-29
ACTBP2	0.164921	3.3654	3.20048	5.32918e-42	1.38094e-40
ZNF337	3.79028	1.0461	-2.74417	5.09372e-41	5.58605e-40
BLNK	7.09262	2.50537	-4.58725	4.10202e-32	1.26563e-31
EVC	1.7148	3.78266	2.06786	2.8574e-31	8.428e-31
ERH	10.5969	15.7292	5.13232	1.1607e-33	3.92145e-33
PIGP	3.69866	1.68304	-2.01562	9.90228e-40	6.65421e-39
APOC1	2.13981	6.97889	4.83908	7.98981e-27	1.90839e-26
SNORD60	0.0143792	2.6587	2.64432	4.00197e-42	1.3088e-40
SGPP2	4.2193	8.81118	4.59187	4.48328e-19	8.21375e-19
LARGE2	5.41876	8.29915	2.88039	3.97088e-14	6.27833e-14
SH3BP4	2.78765	7.70944	4.92179	3.14118e-40	2.3736e-39
SP1	6.34012	9.31279	2.97267	7.10708e-33	2.29393e-32
MT1X	48.9961	13.5722	-35.4238	6.56993e-38	3.2781e-37
EIF4E	7.57872	2.23575	-5.34297	3.04064e-41	4.26682e-40
ATP11C	2.13496	3.13934	1.00438	1.34231e-23	2.8497e-23
CAPS	4.32827	1.6412	-2.68707	1.47131e-40	1.2454e-39
MIR320E	0.111356	2.56328	2.45192	1.85585e-39	1.1713e-38
CBX7	4.58974	2.14564	-2.4441	1.08113e-34	3.95683e-34
DIAPH3	1.19897	2.34869	1.14971	2.35204e-29	6.32294e-29
CCDC84	5.86763	2.27631	-3.59133	3.09182e-41	4.33289e-40
IFRD1	6.59795	4.12265	-2.4753	2.08409e-28	5.33999e-28
C1QTNF5	3.4497	0.000652444	-3.44905	1.52811e-42	1.16112e-40
PTPRA	5.74965	8.46991	2.72025	4.94047e-31	1.44058e-30
PLK1	3.75658	7.0848	3.32821	2.74517e-30	7.69221e-30
STAG2	3.9847	9.39498	5.41028	1.77937e-42	1.16112e-40
CHMP4B	15.3462	17.2977	1.95154	0.000200184	0.000236573
IL20RB	13.1483	9.24473	-3.90354	1.87894e-08	2.53169e-08
EIF4G2	25.3335	37.954	12.6205	1.68638e-26	3.96922e-26
AL353997.3	2.16742	0.000652444	-2.16677	1.52811e-42	1.16112e-40
MBD1	7.88093	5.81041	-2.07052	5.65634e-28	1.41734e-27
SNHG8	16.8484	12.5391	-4.30932	7.53367e-15	1.21975e-14
SH3BP2	5.66417	3.26067	-2.4035	3.14135e-30	8.75998e-30
HERPUD1	8.8538	7.19375	-1.66005	1.40793e-13	2.19479e-13
EXOSC1	5.71975	4.03378	-1.68598	1.64295e-34	5.92616e-34
HPDL	1.17371	2.34555	1.17184	8.57046e-12	1.27507e-11
IGHJ3	0.0111537	2.43997	2.42882	1.22441e-24	2.68696e-24
RPAP2	2.9391	1.64106	-1.29803	2.41358e-40	1.89437e-39
RAB7A	17.0168	44.3641	27.3474	8.744e-40	5.93027e-39
GALNT2	4.99588	8.14159	3.14571	2.99724e-28	7.60699e-28
COA6-AS1	1.02637	2.3518	1.32543	1.17461e-21	2.32405e-21
SIRT7	10.2038	3.34007	-6.86374	6.01357e-41	6.18199e-40
TSHZ3	1.46805	2.66137	1.19332	9.70201e-15	1.56529e-14
RPL37P23	0.636302	3.55975	2.92344	1.34127e-41	2.54093e-40
THAP9-AS1	6.01773	4.56065	-1.45708	2.56889e-18	4.59323e-18
OGG1	3.42172	1.54113	-1.88059	3.52447e-40	2.62894e-39
FAM122A	2.74352	3.84409	1.10057	1.99491e-27	4.87935e-27
DGKZ	6.8378	5.70187	-1.13593	9.17926e-17	1.56749e-16
PDCD2	7.08221	4.15851	-2.92369	1.73862e-39	1.10435e-38
ARHGAP18	1.52329	2.87471	1.35142	6.64899e-33	2.1486e-32
C1orf174	4.18605	3.15001	-1.03603	1.11613e-32	3.56585e-32
ZNHIT2	3.0597	4.73364	1.67394	2.14056e-30	6.0321e-30
HDDC2	9.02588	4.29418	-4.7317	5.92506e-39	3.4106e-38
[truncated: 4,232 more rows]

## Sheet: different immune-related genes
gene	conMean	treatMean	logFC	pValue	fdr
PAK2	4.24625	14.4262	10.18	1.43e-42	1.16e-40
RN7SL1	14.1562	0.000652444	-14.1556	1.53e-42	1.16e-40
XBP1	11.013	0.000652444	-11.0123	1.53e-42	1.16e-40
TNFRSF6B	2.98057	0.000652444	-2.97991	1.53e-42	1.16e-40
HSP90AB1	30.6517	154.498	123.847	1.63e-42	1.16e-40
APOBEC3C	4.08257	10.1682	6.08567	2.04e-42	1.16e-40
LCN10	2.63081	0.0133226	-2.61749	2.14e-42	1.16e-40
POLR2F	9.06882	0.0174362	-9.05139	2.25e-42	1.16e-40
EIF2AK2	2.03473	7.36916	5.33443	2.29e-42	1.16e-40
LRRFIP2	8.91006	3.23614	-5.67392	2.33e-42	1.16e-40
ADAR	7.28368	18.0352	10.7515	2.45e-42	1.18e-40
DCK	2.76464	6.19351	3.42887	2.54e-42	1.19e-40
MET	1.59817	8.52226	6.92409	2.63e-42	1.2e-40
CRKL	5.19224	11.9407	6.74848	2.67e-42	1.2e-40
CTCF	4.40695	7.6705	3.26355	2.81e-42	1.21e-40
ITGAV	3.45494	14.113	10.6581	2.91e-42	1.21e-40
CCL14	9.18163	0.129785	-9.05185	3.06e-42	1.22e-40
ATF2	2.90405	5.66911	2.76506	3.5e-42	1.27e-40
PTPN11	4.55787	9.09042	4.53255	3.62e-42	1.28e-40
ZC3HAV1L	1.32632	4.24738	2.92107	3.94e-42	1.3e-40
ELF4	3.22417	9.34295	6.11878	4.43e-42	1.34e-40
LCN6	2.67142	0.0419169	-2.6295	4.5e-42	1.35e-40
IRF2BP1	3.32774	7.16083	3.83309	4.66e-42	1.36e-40
RNF5	6.35072	12.2931	5.94235	5.28e-42	1.38e-40
NAIP	2.23743	0.0285053	-2.20893	5.8e-42	1.42e-40
HSPA5	14.5429	51.5192	36.9764	6.85e-42	1.56e-40
PLXNA1	3.62745	13.0388	9.41136	6.86e-42	1.56e-40
NRAS	3.79505	9.08573	5.29068	7.84e-42	1.71e-40
GOPC	3.28055	6.04086	2.76031	1.07e-41	2.13e-40
CALR	26.2806	66.1822	39.9016	1.48e-41	2.77e-40
ITPR3	4.52532	13.6707	9.14541	1.51e-41	2.81e-40
FGF7P6	1.33493	0.0280981	-1.30683	2.14e-41	3.64e-40
PSMD6	9.34538	3.88133	-5.46404	2.37e-41	3.84e-40
AKT2	10.4423	4.52538	-5.9169	2.68e-41	4.09e-40
ILK	11.2034	1.71618	-9.48717	2.8e-41	4.14e-40
MKNK1	6.83753	3.59285	-3.24468	2.89e-41	4.19e-40
STUB1	11.674	6.66735	-5.00666	2.94e-41	4.22e-40
EIF4E	7.57872	2.23575	-5.34297	3.04e-41	4.27e-40
PIK3R2	5.92868	0.572192	-5.35648	3.3e-41	4.44e-40
TGFBR1	3.00727	6.44897	3.4417	3.36e-41	4.49e-40
PIK3C3	5.57801	2.08659	-3.49142	3.65e-41	4.71e-40
SMARCE1	9.07624	3.6265	-5.44974	3.97e-41	4.87e-40
CCNA2	3.18968	8.59688	5.4072	4.17e-41	4.99e-40
NUDT6	1.58785	0.220175	-1.36768	4.69e-41	5.34e-40
EGLN2	7.1791	1.90598	-5.27312	4.77e-41	5.38e-40
MAVS	3.75418	7.48494	3.73076	5.01e-41	5.53e-40
SUGT1	6.04995	2.77398	-3.27597	5.18e-41	5.65e-40
CNPY3	4.86321	12.6441	7.78085	5.27e-41	5.7e-40
PCBP2	29.3774	10.9439	-18.4335	5.31e-41	5.73e-40
DDX21	5.8969	15.1355	9.23858	5.92e-41	6.12e-40
LMBR1L	7.79996	2.70209	-5.09787	6.98e-41	6.88e-40
TNFRSF14	9.74345	2.81542	-6.92802	7.1e-41	6.98e-40
FLT3LG	3.42832	0.714851	-2.71347	7.72e-41	7.39e-40
S100A13	11.837	4.74859	-7.08842	8.38e-41	7.86e-40
NFYA	3.11206	5.30066	2.1886	8.52e-41	7.95e-40
IFI6	4.93479	80.8846	75.9498	9.41e-41	8.62e-40
NFATC4	6.98338	1.58254	-5.40084	9.73e-41	8.84e-40
PSMC6	10.4678	5.8146	-4.65316	1.19e-40	1.04e-39
SNX27	2.77748	4.80264	2.02516	1.19e-40	1.04e-39
TRIM37	2.5324	4.48915	1.95674	1.23e-40	1.07e-39
LEAP2	1.5873	0.38042	-1.20688	1.76e-40	1.45e-39
MASP1	1.46342	0.114169	-1.34925	2.22e-40	1.78e-39
PLXNB1	16.1062	7.08419	-9.02201	2.26e-40	1.8e-39
FGF11	4.41587	0.55738	-3.85849	2.41e-40	1.89e-39
SNAP23	5.70646	3.75065	-1.95581	2.85e-40	2.18e-39
IL11RA	4.47445	1.09645	-3.378	2.94e-40	2.24e-39
SPP1	1.65633	45.2817	43.6254	3.09e-40	2.34e-39
KLRK1	1.25086	0.0930056	-1.15785	3.3e-40	2.47e-39
TRPC4AP	7.10219	10.887	3.78483	3.52e-40	2.63e-39
ATG12	5.28826	3.14145	-2.14681	3.64e-40	2.71e-39
CCNT1	2.53678	4.14443	1.60765	3.67e-40	2.73e-39
HNRNPL	18.688	10.9988	-7.68919	3.78e-40	2.8e-39
ANO6	3.03873	6.34293	3.30419	4.51e-40	3.26e-39
RAD21	7.67252	16.5148	8.84224	4.89e-40	3.5e-39
IGF1R	2.666	6.74939	4.08339	5.36e-40	3.79e-39
F2R	1.76497	6.36352	4.59855	5.49e-40	3.87e-39
BGN	7.03611	70.6696	63.6335	5.96e-40	4.17e-39
EED	4.28733	2.39149	-1.89584	6.47e-40	4.49e-39
ADRM1	11.4294	17.9085	6.47912	8.26e-40	5.63e-39
PSMD5	4.01137	6.95971	2.94834	1.04e-39	6.96e-39
SARM1	1.94311	0.565661	-1.37744	1.29e-39	8.43e-39
SERPINE1	2.39994	33.5656	31.1657	1.42e-39	9.21e-39
STAT1	5.34667	21.9809	16.6342	1.48e-39	9.56e-39
RAF1	9.7619	6.16538	-3.59652	1.51e-39	9.77e-39
RIPK2	2.31953	4.29437	1.97484	1.51e-39	9.77e-39
PDIA3	17.7629	33.7549	15.9919	1.6e-39	1.03e-38
ZC3HAV1	3.44594	6.01875	2.57282	1.67e-39	1.07e-38
IL17RC	7.26642	3.64552	-3.6209	2.13e-39	1.33e-38
ISG15	3.73816	29.8106	26.0725	2.81e-39	1.71e-38
DHX9	8.5788	14.3223	5.74347	3.44e-39	2.06e-38
FURIN	6.01154	14.6165	8.60499	4.5e-39	2.64e-38
HSP90AA1	22.5736	76.3068	53.7332	5.5e-39	3.18e-38
TRIM56	3.34161	5.77373	2.43212	6.69e-39	3.82e-38
SKP2	2.76911	6.82068	4.05157	6.69e-39	3.82e-38
COPS5	7.5579	4.27866	-3.27924	7.43e-39	4.22e-38
SOS1	3.33087	5.45839	2.12752	1e-38	5.6e-38
ANXA2	85.9909	35.672	-50.3189	1.02e-38	5.68e-38
CANX	14.4682	30.3585	15.8904	1.17e-38	6.47e-38
LIMS1	3.78912	6.5937	2.80458	1.27e-38	6.96e-38
ATG5	3.65268	5.39181	1.73913	1.57e-38	8.51e-38
IRF3	9.67121	5.52129	-4.14991	2.08e-38	1.11e-37
RFXANK	9.93119	5.44545	-4.48574	2.19e-38	1.16e-37
NR2C1	4.45585	2.47457	-1.98128	2.26e-38	1.2e-37
IGF1	1.50709	0.134081	-1.37301	2.3e-38	1.22e-37
IL27RA	1.35587	4.92003	3.56416	2.3e-38	1.22e-37
INSR	1.853	3.67674	1.82375	2.51e-38	1.32e-37
CALCOCO2	10.6826	5.95123	-4.7314	2.74e-38	1.44e-37
CBL	1.91788	3.58044	1.66255	2.78e-38	1.46e-37
HMGB1	22.7147	11.6172	-11.0975	2.87e-38	1.51e-37
RNF31	6.483	4.0252	-2.4578	3.11e-38	1.62e-37
USP4	6.14773	4.19615	-1.95158	3.21e-38	1.67e-37
ALB	1.27685	0.0516984	-1.22515	3.43e-38	1.77e-37
LANCL1	3.99087	7.18138	3.19051	3.9e-38	2e-37
UBXN1	12.9823	8.69797	-4.28432	6.39e-38	3.2e-37
SEMA3C	1.89257	8.85659	6.96402	6.71e-38	3.34e-37
BRD8	6.79703	3.85114	-2.94588	6.87e-38	3.42e-37
OAS3	3.93258	11.7841	7.8515	8.25e-38	4.07e-37
HDAC2	7.89347	4.55461	-3.33887	8.79e-38	4.33e-37
CD81	25.5213	13.1154	-12.4059	9.06e-38	4.45e-37
CFTR	1.3028	0.164436	-1.13836	1.27e-37	6.14e-37
ACTG1	119.752	402.847	283.096	1.27e-37	6.16e-37
FAM3B	8.21112	1.22461	-6.98651	1.6e-37	7.63e-37
TYK2	10.7056	6.27394	-4.43162	1.76e-37	8.34e-37
JUND	11.4161	34.4339	23.0178	1.99e-37	9.41e-37
SIRT1	2.42821	3.71986	1.29165	2.35e-37	1.1e-36
CFB	7.03796	1.45335	-5.5846	2.63e-37	1.22e-36
MANF	12.9186	7.43143	-5.48717	4.06e-37	1.85e-36
CFP	1.28502	0.213387	-1.07163	4.06e-37	1.85e-36
RXRB	6.88207	4.83187	-2.0502	4.72e-37	2.13e-36
PSMD13	12.1197	8.5305	-3.5892	5.06e-37	2.27e-36
VAV2	2.44364	6.26208	3.81844	6.32e-37	2.81e-36
FAM3D	20.0671	2.50275	-17.5643	7.5e-37	3.33e-36
TP63	8.97216	31.981	23.0088	1.01e-36	4.43e-36
IL17RA	2.23007	3.73529	1.50522	1.56e-36	6.68e-36
CASP4	9.85397	4.71504	-5.13893	2.3e-36	9.74e-36
RAC1	27.943	46.4421	18.4991	2.98e-36	1.25e-35
PSMD1	8.07954	11.8267	3.74717	3.05e-36	1.27e-35
DHX33	2.39164	4.20334	1.8117	3.22e-36	1.34e-35
SYTL1	17.9052	6.67624	-11.229	3.88e-36	1.6e-35
RAD23A	10.0763	16.6482	6.57191	3.91e-36	1.61e-35
IFIT5	1.68844	3.92185	2.23341	4.83e-36	1.98e-35
SERPINA3	3.55285	0.305828	-3.24703	6.33e-36	2.57e-35
BMPR1A	1.91578	2.93583	1.02006	1.04e-35	4.15e-35
IFIT3	2.04193	9.36973	7.3278	1.27e-35	5.03e-35
TNC	4.67667	44.8569	40.1803	1.32e-35	5.22e-35
VPS45	5.5057	3.9451	-1.5606	1.51e-35	5.92e-35
TNFSF13	3.15651	1.54429	-1.61222	1.55e-35	6.1e-35
AKT1	9.16698	6.42592	-2.74106	2.52e-35	9.74e-35
ISG20	5.5117	2.05391	-3.45779	2.66e-35	1.03e-34
PSMC5	14.5474	9.85418	-4.69321	3.2e-35	1.22e-34
C7	9.00587	1.77386	-7.232	3.3e-35	1.26e-34
NR3C1	3.08102	5.44453	2.36351	3.33e-35	1.27e-34
PSMC2	7.08892	11.6718	4.5829	3.41e-35	1.3e-34
FGF19	0.0045696	3.70421	3.69964	3.97e-35	1.51e-34
CMTM6	5.31091	8.65963	3.34872	4.39e-35	1.66e-34
RORC	2.14781	0.347112	-1.8007	5.08e-35	1.91e-34
IFNGR1	7.75053	16.2318	8.48126	6.79e-35	2.52e-34
PSMC4	8.85989	12.9454	4.08547	7.61e-35	2.81e-34
NMB	2.31976	7.14111	4.82134	7.91e-35	2.92e-34
GPR17	1.23688	0.192194	-1.04468	1.06e-34	3.87e-34
CAPRIN1	8.68254	14.3716	5.68909	1.28e-34	4.65e-34
PPIA	81.1888	45.2105	-35.9782	1.31e-34	4.75e-34
STC1	1.1347	6.59232	5.45762	1.43e-34	5.19e-34
CCL23	1.91176	0.224705	-1.68705	1.62e-34	5.84e-34
ELP2	5.64028	3.4368	-2.20348	1.94e-34	6.97e-34
MFF	8.22296	4.98197	-3.24098	2.03e-34	7.29e-34
SIAH2	6.71136	13.997	7.28565	2.08e-34	7.45e-34
NTF4	3.1918	1.28186	-1.90995	2.33e-34	8.32e-34
F2RL1	2.65652	8.18202	5.52551	3.45e-34	1.22e-33
TNFAIP3	3.36651	10.2988	6.93231	4.05e-34	1.42e-33
JAK1	6.1014	10.562	4.4606	4.14e-34	1.45e-33
CXCL9	0.745284	9.68637	8.94108	4.4e-34	1.53e-33
ULBP3	0.796373	2.74446	1.94808	5.12e-34	1.77e-33
RAET1E	7.73083	1.5302	-6.20064	5.86e-34	2.02e-33
ING4	6.24454	3.64392	-2.60062	5.9e-34	2.04e-33
NEDD4	1.56242	2.93308	1.37066	7.18e-34	2.47e-33
ANXA1	475.621	68.6401	-406.981	8.53e-34	2.92e-33
ACAP1	3.18889	1.41061	-1.77828	9.06e-34	3.09e-33
SOS2	3.20909	5.02347	1.81438	1.03e-33	3.49e-33
DDX58	2.27373	5.23027	2.95654	1.05e-33	3.57e-33
CXCL8	1.28639	12.0248	10.7384	1.11e-33	3.75e-33
GSK3B	3.89895	7.26906	3.37011	1.24e-33	4.19e-33
PIK3AP1	0.545549	2.20749	1.66194	1.35e-33	4.54e-33
XCL1	0.19403	1.71588	1.52185	1.38e-33	4.64e-33
IGF2R	4.50586	7.2774	2.77155	1.4e-33	4.7e-33
TRIM7	6.81989	3.07931	-3.74058	1.66e-33	5.57e-33
MAFB	5.63794	13.2012	7.56331	1.99e-33	6.63e-33
UBR1	1.96143	3.04976	1.08834	2.05e-33	6.82e-33
NPPA	1.29588	0.100356	-1.19553	2.59e-33	8.56e-33
ENDOU	9.96644	1.68395	-8.28249	3.23e-33	1.06e-32
RFXAP	1.18626	2.2785	1.09224	3.46e-33	1.14e-32
TK2	3.35784	2.17849	-1.17935	3.59e-33	1.18e-32
XRCC6	17.7422	27.2267	9.48451	4.16e-33	1.36e-32
PSMD10	5.9503	8.63223	2.68192	4.26e-33	1.39e-32
RB1	5.01342	8.70578	3.69235	4.76e-33	1.55e-32
ABL1	5.65083	9.39171	3.74088	4.83e-33	1.58e-32
NTF3	1.3819	0.295259	-1.08664	6.04e-33	1.96e-32
TLR2	1.59556	4.1595	2.56394	6.5e-33	2.1e-32
SP1	6.34012	9.31279	2.97267	7.11e-33	2.29e-32
PDGFB	1.94633	4.24532	2.29899	7.27e-33	2.34e-32
RELB	2.90148	6.0727	3.17122	9.21e-33	2.95e-32
GAST	0.0500675	2.39414	2.34407	9.7e-33	3.11e-32
ABCA1	1.93875	4.27275	2.334	1.21e-32	3.86e-32
GNAI3	2.3692	3.63159	1.26238	1.76e-32	5.57e-32
OAS2	3.6308	11.5244	7.89364	2.28e-32	7.15e-32
RSAD2	0.736917	4.18086	3.44394	2.46e-32	7.68e-32
PIK3CA	2.56348	4.13837	1.57489	2.6e-32	8.14e-32
CTSD	27.1009	47.0893	19.9884	2.77e-32	8.65e-32
FYN	4.55902	2.52456	-2.03446	3.29e-32	1.02e-31
MAPKAPK2	8.12612	12.0616	3.93544	3.52e-32	1.09e-31
BLNK	7.09262	2.50537	-4.58725	4.1e-32	1.27e-31
CYBB	1.25104	3.95644	2.7054	4.35e-32	1.34e-31
SIRPA	3.53018	8.01466	4.48448	6.74e-32	2.06e-31
FCGR3A	1.27435	5.35466	4.08032	7.15e-32	2.18e-31
SOCS3	5.52851	17.6172	12.0887	8.45e-32	2.57e-31
SDC3	2.53092	5.32637	2.79545	9.02e-32	2.74e-31
PSME3	8.63201	12.9625	4.33051	1.08e-31	3.27e-31
CSRP1	23.755	10.3737	-13.3812	1.3e-31	3.9e-31
CTSH	9.87057	5.22105	-4.64951	1.5e-31	4.5e-31
UBE2N	9.2451	6.58016	-2.66495	1.66e-31	4.97e-31
BMP8A	0.224237	1.55424	1.33	1.71e-31	5.11e-31
CXCL16	5.75224	10.0202	4.26794	2.74e-31	8.08e-31
WDR62	1.27444	2.6308	1.35636	3.14e-31	9.25e-31
IL34	5.15659	1.54527	-3.61132	3.25e-31	9.58e-31
TRIM32	2.15276	3.47577	1.32301	6.22e-31	1.8e-30
ZBTB16	2.66893	0.572903	-2.09603	6.92e-31	2e-30
MUC1	19.1424	6.38809	-12.7543	8.58e-31	2.47e-30
IFIH1	2.50118	5.49363	2.99245	8.9e-31	2.56e-30
GIPR	1.46368	0.397644	-1.06604	9.77e-31	2.8e-30
GMFB	3.65694	5.25468	1.59775	1.29e-30	3.68e-30
GP2	1.4467	0.249996	-1.1967	1.4e-30	3.98e-30
CSF3R	2.73987	0.70222	-2.03765	1.61e-30	4.57e-30
SDC1	29.4017	71.904	42.5024	1.7e-30	4.81e-30
OSMR	4.19692	9.44395	5.24703	2.08e-30	5.87e-30
SMAD4	4.99097	3.26253	-1.72845	2.5e-30	7.03e-30
GREM2	2.22794	0.60904	-1.6189	2.5e-30	7.03e-30
F2RL2	0.414532	2.8007	2.38617	2.63e-30	7.38e-30
PLK1	3.75658	7.0848	3.32821	2.75e-30	7.69e-30
CTSG	2.04411	0.418744	-1.62537	2.8e-30	7.85e-30
NPR1	2.23137	0.863652	-1.36772	2.89e-30	8.06e-30
CMTM8	1.69908	3.82262	2.12354	2.93e-30	8.18e-30
SH3BP2	5.66417	3.26067	-2.4035	3.14e-30	8.76e-30
VEGFA	13.3376	6.19081	-7.14678	3.25e-30	9.06e-30
XRCC5	11.374	17.1416	5.76759	3.35e-30	9.32e-30
CALM1	29.6862	18.2507	-11.4356	3.36e-30	9.35e-30
SHC2	3.27919	1.38742	-1.89178	3.97e-30	1.1e-29
CCDC88A	1.74728	3.37652	1.62925	4.8e-30	1.33e-29
XIAP	3.51957	5.05349	1.53392	5.65e-30	1.56e-29
AKAP10	3.11985	4.1259	1.00606	7.76e-30	2.13e-29
CXCR2	4.16808	1.09135	-3.07673	9e-30	2.46e-29
CD14	3.43974	9.28598	5.84624	9.46e-30	2.59e-29
ERAP1	3.22662	5.76353	2.53691	1.05e-29	2.87e-29
ADIPOR1	12.0352	18.0782	6.04305	1.14e-29	3.12e-29
RUSC1	7.69482	5.832	-1.86282	1.21e-29	3.29e-29
ANOS1	0.606772	2.31135	1.70458	1.34e-29	3.65e-29
MUL1	4.51806	6.27535	1.75729	1.5e-29	4.07e-29
ITPR1	3.28516	1.71675	-1.56842	1.65e-29	4.45e-29
HRAS	14.9758	9.35275	-5.62302	1.72e-29	4.64e-29
RABEP1	3.64527	5.1404	1.49513	2.59e-29	6.96e-29
FCGR2B	2.00901	0.603839	-1.40517	2.74e-29	7.35e-29
MAP3K5	2.97197	4.78947	1.8175	3.2e-29	8.54e-29
TG	1.35199	0.286463	-1.06553	3.38e-29	9.01e-29
CASP3	4.86336	6.80493	1.94157	3.43e-29	9.14e-29
IRF6	10.5499	22.1855	11.6356	3.52e-29	9.39e-29
TRIM21	3.24491	5.47662	2.23171	4.59e-29	1.21e-28
RBP7	5.82616	2.53328	-3.29288	4.66e-29	1.23e-28
LY96	2.04948	4.76333	2.71385	5.06e-29	1.34e-28
C4A	4.38762	1.59536	-2.79226	7.83e-29	2.05e-28
HLA-DRA	13.9067	66.2242	52.3176	8.99e-29	2.35e-28
IFIT2	1.00239	3.24401	2.24162	9.98e-29	2.6e-28
NR1D2	2.93052	5.35705	2.42653	1.54e-28	3.97e-28
PCBP1	22.435	31.4786	9.04358	1.59e-28	4.09e-28
SLC29A3	1.24172	2.43466	1.19294	1.91e-28	4.89e-28
RARG	15.3606	9.24657	-6.11403	2.05e-28	5.27e-28
IFRD1	6.59795	4.12265	-2.4753	2.08e-28	5.34e-28
LRRK2	2.28734	0.872626	-1.41472	2.25e-28	5.75e-28
PIK3CD	2.16412	3.69342	1.52931	2.33e-28	5.94e-28
SDC4	12.1238	27.2913	15.1675	2.49e-28	6.35e-28
ARRB1	2.99013	1.53573	-1.4544	2.7e-28	6.88e-28
TPSB2	8.51604	2.93033	-5.58571	3.3e-28	8.36e-28
CCR1	0.59755	1.85785	1.2603	3.99e-28	1.01e-27
CXCL11	0.318091	3.40166	3.08357	3.99e-28	1.01e-27
PIAS4	3.55102	4.7258	1.17479	4.34e-28	1.09e-27
SRXN1	8.02061	3.35885	-4.66175	4.67e-28	1.18e-27
VEGFB	9.06893	14	4.93111	4.8e-28	1.21e-27
TSC22D3	17.1349	7.24115	-9.89373	4.9e-28	1.23e-27
STAP2	12.4942	8.00303	-4.49115	5.54e-28	1.39e-27
PSMA7	18.4348	26.2745	7.83971	7.77e-28	1.93e-27
IL2RB	1.0973	2.97868	1.88138	1.04e-27	2.57e-27
PPP3R1	5.41655	6.99114	1.57459	1.19e-27	2.95e-27
FADD	3.67085	9.05123	5.38038	1.78e-27	4.36e-27
ZMYND11	4.79702	6.89764	2.10063	1.93e-27	4.72e-27
NENF	7.3789	11.3263	3.94744	1.93e-27	4.72e-27
CD79B	1.79702	0.655916	-1.14111	1.96e-27	4.78e-27
NFKBIE	2.18897	3.75475	1.56578	2.15e-27	5.25e-27
FGF7	2.86865	0.865523	-2.00313	3.01e-27	7.29e-27
UCP2	3.13445	7.28206	4.1476	4.12e-27	9.94e-27
PTGER4	1.23916	2.81987	1.58071	4.91e-27	1.18e-26
PLA2G2A	13.3998	3.86711	-9.53272	6.9e-27	1.65e-26
IL18	13.6989	5.95789	-7.74097	8.65e-27	2.06e-26
MFN2	8.12657	12.1172	3.99061	1.26e-26	2.97e-26
CRIM1	3.73005	6.16344	2.43339	1.4e-26	3.3e-26
HLA-A	25.1012	71.0809	45.9797	1.53e-26	3.61e-26
TBK1	3.54748	4.83667	1.28919	1.55e-26	3.66e-26
IMPDH2	18.3267	12.263	-6.0637	1.67e-26	3.93e-26
SEMA4F	0.907242	1.95707	1.04983	1.8e-26	4.22e-26
RABEP2	4.82438	3.6732	-1.15118	3.38e-26	7.88e-26
S100A6	54.8652	111.12	56.2545	3.52e-26	8.18e-26
SKIV2L	6.89474	5.3259	-1.56884	4.86e-26	1.12e-25
ELN	9.96563	3.65687	-6.30877	7.94e-26	1.82e-25
RPS6KA4	6.20373	9.75921	3.55548	8.15e-26	1.87e-25
PROCR	3.14603	6.60958	3.46355	1.02e-25	2.34e-25
YJEFN3	2.15245	1.00504	-1.14741	1.04e-25	2.38e-25
LTB4R2	6.17355	3.23616	-2.93739	1.06e-25	2.41e-25
S100A14	147.456	55.9001	-91.556	1.28e-25	2.92e-25
HAVCR2	0.802651	2.0855	1.28285	1.29e-25	2.94e-25
BST2	6.34601	29.9041	23.5581	1.32e-25	3e-25
KHSRP	14.3498	20.3868	6.03703	1.43e-25	3.25e-25
GNRH1	2.03073	1.00017	-1.03056	1.73e-25	3.92e-25
TOLLIP	10.1854	6.86865	-3.31674	2.22e-25	5e-25
JUN	10.4397	23.0572	12.6176	2.28e-25	5.13e-25
PRKDC	7.32394	12.2974	4.97344	2.64e-25	5.94e-25
HLA-DRB1	8.65901	29.2571	20.598	2.85e-25	6.42e-25
FLI1	2.19403	1.17289	-1.02113	4.02e-25	8.99e-25
SENP2	3.58441	5.10804	1.52363	4.66e-25	1.04e-24
FLT4	2.25578	1.18705	-1.06873	5e-25	1.12e-24
NFAT5	2.78894	4.31126	1.52232	5.03e-25	1.12e-24
MYDGF	9.00673	12.8692	3.86246	5.03e-25	1.12e-24
CCL4L2	0.500035	2.06572	1.56568	5.4e-25	1.2e-24
RAC2	3.97187	8.87344	4.90157	5.76e-25	1.28e-24
PMAIP1	3.50179	6.32227	2.82049	7.98e-25	1.76e-24
NLRP1	5.44746	3.18461	-2.26285	1.04e-24	2.3e-24
ZAP70	1.94585	0.728192	-1.21766	1.19e-24	2.62e-24
C1QA	5.04461	16.1295	11.0849	1.21e-24	2.66e-24
IGHJ3	0.0111537	2.43997	2.42882	1.22e-24	2.69e-24
CCN3	1.13529	2.71165	1.57636	1.55e-24	3.39e-24
HSPD1	14.8596	25.7457	10.8861	1.67e-24	3.65e-24
ACTA1	1.90717	0.650268	-1.2569	1.7e-24	3.72e-24
FGFR1	6.21166	3.67599	-2.53567	1.77e-24	3.87e-24
CISH	2.89193	1.85316	-1.03876	2.02e-24	4.41e-24
CLEC11A	2.66296	4.91351	2.25055	3.07e-24	6.66e-24
KRAS	4.24158	6.23915	1.99757	3.98e-24	8.6e-24
IL1RN	76.9662	26.2256	-50.7406	4.44e-24	9.57e-24
LGALS2	0.635294	1.67309	1.0378	6.88e-24	1.47e-23
RARA	3.44193	4.89412	1.45219	7.01e-24	1.5e-23
CASP7	3.7484	5.48531	1.73691	7.94e-24	1.7e-23
PRMT1	12.9469	9.42762	-3.5193	8.72e-24	1.86e-23
NFYC	6.93418	5.46221	-1.47198	8.89e-24	1.9e-23
BMP8B	0.727716	1.86603	1.13831	1.38e-23	2.92e-23
IFITM2	22.009	11.3948	-10.6142	1.39e-23	2.95e-23
SPINK5	46.176	16.3598	-29.8162	1.74e-23	3.68e-23
NFKB2	4.87358	8.1054	3.23182	1.95e-23	4.11e-23
AQP3	66.718	26.5783	-40.1397	1.99e-23	4.19e-23
RIPK1	4.09544	5.50352	1.40807	2.41e-23	5.05e-23
CCL5	2.20274	8.28011	6.07737	2.42e-23	5.08e-23
ULBP2	2.07923	5.09517	3.01594	2.71e-23	5.68e-23
HCK	1.70197	3.63495	1.93298	2.83e-23	5.92e-23
NEO1	3.60662	5.95098	2.34436	3.58e-23	7.47e-23
HMGN2	25.8379	17.5961	-8.24178	4.32e-23	8.99e-23
NFKB1	4.92333	6.79718	1.87385	6e-23	1.24e-22
SEMA3B	3.63262	1.93315	-1.69948	6.3e-23	1.3e-22
LRRFIP1	9.85208	7.23192	-2.62016	6.38e-23	1.32e-22
NFATC1	1.59493	2.81561	1.22067	6.45e-23	1.34e-22
ELF1	6.53545	9.30294	2.76749	9.15e-23	1.88e-22
FCGRT	8.43604	5.39933	-3.03672	9.85e-23	2.02e-22
SPI1	2.73987	5.14067	2.40079	2.21e-22	4.49e-22
G3BP1	6.89889	8.87855	1.97967	2.45e-22	4.97e-22
S100P	28.217	8.38018	-19.8368	2.63e-22	5.33e-22
APOBEC3F	1.28383	2.3961	1.11227	3.28e-22	6.6e-22
AXL	2.75565	5.3858	2.63015	3.28e-22	6.6e-22
TXLNA	5.57814	7.22011	1.64197	3.76e-22	7.57e-22
LYN	2.60153	4.65605	2.05452	5.84e-22	1.17e-21
SNCA	2.68276	1.22847	-1.45428	8.46e-22	1.68e-21
LGALS9	6.5576	4.30034	-2.25726	8.87e-22	1.76e-21
CBLC	6.29653	10.7068	4.41026	1.04e-21	2.07e-21
VIPR1	2.83665	1.501	-1.33564	2.13e-21	4.17e-21
EDN1	1.7927	3.63823	1.84553	2.38e-21	4.66e-21
VASP	7.68099	10.144	2.463	2.39e-21	4.69e-21
KITLG	2.6714	5.24572	2.57431	2.44e-21	4.77e-21
CAMKK2	4.22936	5.29653	1.06717	2.47e-21	4.83e-21
SLC40A1	2.87762	5.86913	2.99152	2.51e-21	4.91e-21
PLAUR	3.11586	5.56261	2.44675	2.66e-21	5.21e-21
STIM1	9.23366	7.01526	-2.2184	3.75e-21	7.29e-21
CXCL14	10.3183	59.8168	49.4986	4.55e-21	8.83e-21
BMP2	1.46845	3.92286	2.45441	4.68e-21	9.09e-21
THBS1	6.75235	17.8457	11.0934	6.17e-21	1.19e-20
PLXNB2	15.7489	23.5401	7.79128	9.89e-21	1.9e-20
PSME2	15.771	10.7779	-4.99305	1.23e-20	2.36e-20
ACKR3	4.81175	17.0833	12.2715	1.27e-20	2.44e-20
FABP5	146.587	66.8848	-79.7019	1.79e-20	3.42e-20
MAPK1	6.02715	7.98995	1.9628	1.96e-20	3.74e-20
SPON2	8.12794	4.72485	-3.40309	2.14e-20	4.07e-20
IGHV1-46	0.911242	5.31996	4.40871	2.53e-20	4.8e-20
IFIT1	1.69154	4.66136	2.96982	2.74e-20	5.19e-20
MLST8	6.24293	4.98142	-1.26151	2.79e-20	5.28e-20
TYMP	11.3327	25.0538	13.7211	3.05e-20	5.78e-20
ZYX	15.1494	24.6967	9.54728	3.65e-20	6.89e-20
RORA	3.35617	1.95065	-1.40552	4.41e-20	8.3e-20
IGKV1-33	4.17456	1.09957	-3.07499	4.86e-20	9.13e-20
INHBB	1.24405	3.46474	2.22069	5.64e-20	1.06e-19
INPP5D	4.59872	1.83436	-2.76437	6.1e-20	1.14e-19
IGHG4	6.76504	59.9189	53.1539	6.84e-20	1.28e-19
OASL	1.34327	4.64258	3.29931	9.24e-20	1.72e-19
LGALS8	9.58634	5.08385	-4.50249	1.05e-19	1.96e-19
PPARG	2.40535	1.15562	-1.24973	1.37e-19	2.54e-19
IGHV3-20	0.224552	1.73552	1.51097	1.55e-19	2.87e-19
USP2	2.30866	1.05177	-1.25689	1.92e-19	3.55e-19
REG1A	2.35665	0.608171	-1.74848	3e-19	5.53e-19
PPARD	6.90382	10.9908	4.08696	4.29e-19	7.87e-19
STC2	1.21739	3.21682	1.99943	4.58e-19	8.39e-19
PDCD1LG2	0.460077	1.52956	1.06948	4.74e-19	8.67e-19
IL17RE	4.1081	2.81729	-1.29081	8.62e-19	1.56e-18
TNFRSF10A	2.73247	4.23593	1.50346	1.12e-18	2.03e-18
GKN1	4.52473	0.44014	-4.08459	1.76e-18	3.17e-18
PQBP1	9.24888	7.62125	-1.62762	1.9e-18	3.42e-18
IFI16	12.391	17.9756	5.58461	2.45e-18	4.38e-18
ARF6	11.607	16.2855	4.6785	2.46e-18	4.4e-18
ABCG1	1.85432	3.052	1.19768	2.58e-18	4.62e-18
GNAI1	4.50609	6.53297	2.02688	2.58e-18	4.62e-18
IGLV3-21	2.17811	10.5512	8.37314	2.82e-18	5.03e-18
RAET1G	4.45725	2.50477	-1.95248	2.9e-18	5.17e-18
IGKV4-1	3.83207	27.0083	23.1762	3.21e-18	5.72e-18
AAMP	11.1018	9.64317	-1.45867	3.43e-18	6.09e-18
LY86	0.795546	2.03414	1.2386	4.23e-18	7.51e-18
IGHV4-31	0.68795	4.0982	3.41025	4.64e-18	8.22e-18
IGHV5-51	2.19216	12.2131	10.021	4.69e-18	8.31e-18
ITGA3	7.62636	16.6342	9.00782	4.82e-18	8.53e-18
IGKV1-39	0.520469	1.7854	1.26493	5.03e-18	8.9e-18
SERPINB9	2.69592	4.75641	2.06049	5.14e-18	9.09e-18
LTBR	14.1934	11.725	-2.46831	5.17e-18	9.14e-18
MSR1	0.668826	1.78707	1.11824	5.2e-18	9.19e-18
PSMC3	11.2703	14.401	3.13064	9.85e-18	1.73e-17
BCL10	4.0789	5.7087	1.6298	1.21e-17	2.12e-17
C3	20.4148	11.8258	-8.58901	2.35e-17	4.08e-17
GLRX	3.34437	2.11971	-1.22466	2.42e-17	4.21e-17
LGALS1	20.1764	56.4134	36.237	2.44e-17	4.23e-17
CKLF	4.4914	3.48229	-1.00911	2.68e-17	4.64e-17
PSMD2	14.5327	22.014	7.48133	2.74e-17	4.74e-17
HLA-B	32.9257	89.2367	56.311	3.22e-17	5.57e-17
ARTN	1.58578	4.06118	2.4754	3.51e-17	6.06e-17
TNFSF12	4.58987	3.19517	-1.39469	4.3e-17	7.42e-17
IL13RA1	7.23646	10.3589	3.12246	4.4e-17	7.57e-17
HLA-H	2.89976	6.09499	3.19523	5.2e-17	8.94e-17
PTGS2	1.15403	3.62699	2.47296	5.83e-17	1e-16
S100A9	1679.27	767.135	-912.138	6.35e-17	1.09e-16
CXCL17	17.169	8.88501	-8.28399	6.72e-17	1.15e-16
IGF2	2.57625	5.64379	3.06754	7.19e-17	1.23e-16
IL24	0.581536	1.85405	1.27251	7.53e-17	1.29e-16
MAP3K8	4.63388	3.17489	-1.45898	8.99e-17	1.54e-16
PTAFR	2.07403	3.43254	1.35851	1e-16	1.71e-16
TGFB2	0.637536	1.8715	1.23397	1.52e-16	2.57e-16
TAP2	6.77313	4.90759	-1.86555	1.72e-16	2.91e-16
CFH	6.84239	4.56959	-2.2728	2.09e-16	3.53e-16
TRIM28	19.9596	33.1026	13.1431	2.38e-16	4.02e-16
WNT3A	0.662314	2.10749	1.44518	4.87e-16	8.17e-16
CAV1	7.66973	21.2909	13.6212	5.26e-16	8.8e-16
AZGP1	3.91967	1.0908	-2.82887	5.34e-16	8.94e-16
IGHV3-21	2.17208	8.9817	6.80962	5.5e-16	9.21e-16
UCHL1	2.33463	16.8745	14.5399	6.15e-16	1.03e-15
IGHV1-69	0.79666	4.49749	3.70083	6.87e-16	1.15e-15
PIAS3	8.73892	7.14119	-1.59774	7.52e-16	1.25e-15
ACVR1B	4.5111	5.87456	1.36346	8.37e-16	1.39e-15
NR2F1	3.34277	2.25193	-1.09084	8.41e-16	1.4e-15
DKK1	1.78083	5.45743	3.67661	9.53e-16	1.58e-15
AIP	6.5902	8.85135	2.26116	1.02e-15	1.69e-15
LYZ	5.76655	13.0282	7.26165	1.42e-15	2.34e-15
PGC	4.86405	1.71202	-3.15203	1.69e-15	2.79e-15
NXN	5.56196	7.83666	2.2747	2.21e-15	3.62e-15
MAP2K3	8.90257	7.03921	-1.86336	2.25e-15	3.69e-15
IGHG3	4.62867	15.2245	10.5958	3.18e-15	5.21e-15
CTNNB1	11.6092	15.66	4.05078	3.32e-15	5.44e-15
CCL19	7.38937	2.67866	-4.71071	3.82e-15	6.23e-15
CLDN4	20.662	11.7197	-8.9423	4.09e-15	6.67e-15
MMP7	1.78339	6.26841	4.48503	5.99e-15	9.73e-15
DICER1	4.22186	5.38092	1.15905	6.29e-15	1.02e-14
PSMD3	9.65839	12.0833	2.42491	8.07e-15	1.3e-14
BID	3.55839	4.75909	1.2007	8.8e-15	1.42e-14
IL33	3.78838	2.23928	-1.5491	1.01e-14	1.63e-14
FSTL1	6.39195	11.0272	4.63525	1.05e-14	1.7e-14
JAG1	10.1541	18.4419	8.28773	1.09e-14	1.75e-14
TNFSF10	9.16559	18.4007	9.23508	2.17e-14	3.46e-14
PSMD11	8.9515	11.462	2.5105	2.34e-14	3.73e-14
TUFM	16.0591	19.7666	3.70742	2.53e-14	4.02e-14
ANXA6	7.06213	4.77717	-2.28497	2.65e-14	4.22e-14
GAS6	10.8181	7.52838	-3.28974	2.96e-14	4.7e-14
PSME1	17.4745	23.6053	6.13082	3.41e-14	5.41e-14
S100B	3.3397	2.31948	-1.02022	3.44e-14	5.46e-14
CTSL	5.81366	10.0482	4.23458	3.48e-14	5.51e-14
MOV10	8.09351	6.14572	-1.94779	4.01e-14	6.33e-14
IGHV1-24	1.14027	5.16376	4.02349	4.18e-14	6.6e-14
GSTP1	79.3124	127.552	48.2399	5.24e-14	8.27e-14
IDO1	0.763305	4.21372	3.45042	9.13e-14	1.43e-13
IGHV3-15	1.9467	8.69417	6.74747	1.61e-13	2.51e-13
BPIFB2	7.56572	4.32088	-3.24484	1.63e-13	2.54e-13
PELI2	1.16343	2.47946	1.31603	2.19e-13	3.4e-13
IGLV3-19	3.00559	13.2262	10.2206	2.39e-13	3.71e-13
MST1R	5.76755	3.92531	-1.84224	2.55e-13	3.96e-13
FCGR2A	2.47453	4.0232	1.54867	3.01e-13	4.66e-13
CTSB	31.3381	55.4005	24.0624	3.19e-13	4.93e-13
GRN	33.3542	46.8591	13.5049	3.55e-13	5.48e-13
GPSM1	2.18682	3.20598	1.01916	3.91e-13	6.02e-13
IGHV3-49	1.19186	4.88649	3.69463	4.66e-13	7.18e-13
TNFRSF10B	4.75892	6.78265	2.02373	5.37e-13	8.25e-13
DDX60L	1.75331	2.78154	1.02823	5.52e-13	8.47e-13
ILF3	12.317	10.7938	-1.52322	5.56e-13	8.54e-13
IGLV1-40	3.96774	14.0052	10.0374	7.33e-13	1.12e-12
IL4R	10.0835	7.46442	-2.61907	1.32e-12	2.01e-12
IGHV3-53	0.514234	2.61666	2.10243	1.44e-12	2.19e-12
LTB4R	11.6899	8.09062	-3.59926	1.67e-12	2.53e-12
IGHV4-59	2.3541	8.66743	6.31333	2.06e-12	3.12e-12
PRDX2	22.1818	17.758	-4.42381	2.31e-12	3.49e-12
IGKV3-20	7.28176	34.9662	27.6844	2.49e-12	3.76e-12
CD36	3.92147	1.78507	-2.1364	2.71e-12	4.08e-12
VCAM1	1.36885	3.28875	1.91991	2.76e-12	4.15e-12
CDC42	14.7198	18.3167	3.59691	2.89e-12	4.35e-12
SYK	4.25191	6.36182	2.10992	2.93e-12	4.41e-12
S100A7	61.6948	242.947	181.252	3.19e-12	4.79e-12
DEFB1	17.0387	12.3659	-4.67279	4.37e-12	6.53e-12
RCOR1	5.78745	7.82367	2.03623	6.97e-12	1.04e-11
RARRES2	9.89575	6.13167	-3.76408	8.91e-12	1.32e-11
SEMA3A	0.584941	1.61271	1.02777	9.71e-12	1.44e-11
ITCH	5.0451	6.42144	1.37634	1.01e-11	1.5e-11
GBP2	8.34354	6.06491	-2.27864	1.54e-11	2.28e-11
CMTM3	3.39163	5.13134	1.73971	1.76e-11	2.59e-11
IGKV1-12	0.491038	2.4367	1.94566	2.31e-11	3.39e-11
IGLV6-57	1.51573	5.69981	4.18408	2.92e-11	4.27e-11
UCN2	1.4578	2.54119	1.08338	3.16e-11	4.62e-11
MFN1	5.45035	6.52408	1.07372	3.39e-11	4.96e-11
ULK1	5.7346	7.86172	2.12712	3.54e-11	5.16e-11
FXR1	7.38991	6.32396	-1.06595	4.14e-11	6.03e-11
IGLV1-51	4.08926	13.7609	9.67165	7.73e-11	1.12e-10
IGHG2	10.4211	39.386	28.965	8.39e-11	1.21e-10
DDX17	20.3002	17.3835	-2.91674	1.47e-10	2.1e-10
TNFRSF1B	2.70681	3.9771	1.27029	1.51e-10	2.17e-10
UBQLN1	7.39099	8.77324	1.38225	1.56e-10	2.23e-10
PRF1	0.962266	2.11537	1.1531	2.17e-10	3.1e-10
NRG1	1.31107	2.77123	1.46015	2.77e-10	3.94e-10
HSPA1B	24.9981	16.0957	-8.90232	4.62e-10	6.53e-10
CXCL1	6.00282	17.7637	11.7609	5.82e-10	8.21e-10
IGLV2-11	3.50516	10.1565	6.65135	7.65e-10	1.07e-09
IGLV1-44	3.39355	12.3277	8.93413	9.28e-10	1.3e-09
YWHAE	28.1202	35.9328	7.81264	1.07e-09	1.49e-09
PDGFRB	5.33728	8.7674	3.43012	1.19e-09	1.67e-09
PTN	8.52787	6.09174	-2.43613	1.27e-09	1.78e-09
PSMB8	8.95212	13.0968	4.14473	1.33e-09	1.86e-09
HSPA2	6.80318	5.06134	-1.74184	1.71e-09	2.38e-09
SCGB3A1	6.45605	2.14463	-4.31142	2.82e-09	3.9e-09
NRP1	2.83723	4.0733	1.23607	3.87e-09	5.34e-09
IL36G	2.60518	8.28454	5.67935	5.12e-09	7.02e-09
TNIP1	10.8963	9.13981	-1.75653	7.45e-09	1.02e-08
HSPA6	1.92612	4.94884	3.02273	7.5e-09	1.02e-08
IGHV3-11	1.71474	4.93356	3.21882	7.78e-09	1.06e-08
GREM1	3.37304	5.95082	2.57778	8.01e-09	1.09e-08
CCN1	7.26606	12.313	5.04698	1.15e-08	1.56e-08
IGHV3-43	0.605455	2.26228	1.65683	1.21e-08	1.64e-08
PRKCD	5.91916	6.98639	1.06724	1.32e-08	1.79e-08
IGHG1	20.1278	58.7026	38.5748	1.45e-08	1.96e-08
IGHV2-26	0.657164	2.68399	2.02683	1.47e-08	1.98e-08
IL20RB	13.1483	9.24473	-3.90354	1.88e-08	2.53e-08
CSF1	3.78315	5.32752	1.54438	1.88e-08	2.53e-08
ADA2	2.31185	3.63538	1.32353	3.16e-08	4.23e-08
DUOX2	5.07561	3.82646	-1.24915	3.43e-08	4.58e-08
IGHV2-70	0.957323	3.15651	2.19918	3.63e-08	4.84e-08
IGHV3-66	0.591826	1.61212	1.02029	3.64e-08	4.86e-08
DHCR24	22.5127	33.2384	10.7257	6.51e-08	8.62e-08
HLA-DPB1	7.06384	11.7575	4.69366	7.87e-08	1.04e-07
IFITM1	15.3867	26.1396	10.7529	8.09e-08	1.07e-07
AKT3	2.13627	3.33492	1.19864	8.22e-08	1.08e-07
IGKV1-16	1.95256	7.05233	5.09976	1.54e-07	2.02e-07
SECTM1	3.4101	5.11246	1.70236	1.7e-07	2.22e-07
PML	6.506	7.97407	1.46807	1.81e-07	2.36e-07
IGHV1-3	0.651551	2.26039	1.60884	2.09e-07	2.72e-07
IGHV3-73	0.848625	2.74886	1.90024	2.39e-07	3.1e-07
SAA2	3.67781	1.63942	-2.0384	2.45e-07	3.17e-07
PRDX1	44.9756	66.5189	21.5433	2.71e-07	3.51e-07
TRAC	2.99793	4.57482	1.57688	3.14e-07	4.06e-07
ERAP2	2.41485	4.16291	1.74806	4.47e-07	5.75e-07
CSF1R	2.54028	3.65815	1.11787	5.93e-07	7.61e-07
IGKV1-27	2.02264	5.57724	3.5546	6.22e-07	7.98e-07
LTB	1.796	2.81275	1.01674	6.9e-07	8.85e-07
GLI1	0.376541	1.70671	1.33017	6.95e-07	8.9e-07
ANGPTL4	6.38076	4.98626	-1.3945	7.24e-07	9.27e-07
NAMPT	19.3851	15.7246	-3.66054	8.5e-07	1.09e-06
HSPA1A	28.361	17.9742	-10.3868	8.61e-07	1.1e-06
TRIB3	4.19463	5.33195	1.13733	8.94e-07	1.14e-06
PTGES	4.12397	7.90664	3.78266	9.8e-07	1.25e-06
FGFR3	16.9956	13.5102	-3.48531	1.06e-06	1.35e-06
SREBF1	14.6736	11.776	-2.89763	1.32e-06	1.67e-06
IGLV2-14	5.97984	14.5037	8.52384	1.41e-06	1.79e-06
HLA-F	8.32713	6.50206	-1.82507	2.95e-06	3.69e-06
ATF4	28.1127	24.9819	-3.13082	3.13e-06	3.91e-06
CD3D	1.76301	2.78602	1.02301	3.27e-06	4.09e-06
PLXND1	6.40724	5.30177	-1.10547	4.13e-06	5.14e-06
SBDS	11.0392	13.2001	2.16083	4.3e-06	5.35e-06
HSF1	9.30057	10.771	1.47043	5.67e-06	7.04e-06
ATF3	4.7761	6.26235	1.48625	6.15e-06	7.63e-06
PLA2G4A	2.42449	3.94622	1.52173	6.37e-06	7.89e-06
PAK1	5.20684	7.06672	1.85988	8.34e-06	1.03e-05
BIRC3	2.11519	3.43625	1.32106	9.35e-06	1.15e-05
IGLV10-54	0.75043	2.28717	1.53674	9.62e-06	1.19e-05
IGKV1-6	1.9052	4.56174	2.65654	1.04e-05	1.28e-05
IGHV3-13	0.488368	1.73318	1.24481	1.19e-05	1.46e-05
IGKV1D-16	0.605468	1.61183	1.00636	1.24e-05	1.52e-05
NTS	1.41446	34.2956	32.8811	1.45e-05	1.77e-05
JAG2	5.61831	7.13084	1.51253	1.78e-05	2.18e-05
IGKV2D-29	0.91179	2.86158	1.94979	1.93e-05	2.35e-05
NR1D1	6.03499	7.4339	1.39891	2.32e-05	2.83e-05
PRKX	4.34973	5.94508	1.59534	2.39e-05	2.92e-05
BMP7	5.48669	8.55312	3.06643	3.3e-05	4e-05
OAS1	8.1887	6.90459	-1.28411	4.34e-05	5.24e-05
IGLV3-9	0.660875	2.09993	1.43906	5.54e-05	6.66e-05
CCL21	12.1265	9.84545	-2.28102	7.28e-05	8.72e-05
INSIG1	5.89972	7.01346	1.11374	7.66e-05	9.18e-05
DUSP1	24.5794	37.1036	12.5242	8.45e-05	0.000101042
SEMA4C	4.64657	5.72291	1.07633	8.78e-05	0.000104953
CSF3	1.15722	2.33845	1.18123	9.53e-05	0.000113762
IGLC7	1.07647	2.71556	1.63909	0.000113746	0.000135487
BMP1	5.34796	6.35431	1.00635	0.00013558	0.000161144
PPP4C	11.9853	13.2689	1.28358	0.000166556	0.000197427
IL32	5.10409	7.50487	2.40078	0.000236718	0.000279328
CXCL2	2.13667	3.20415	1.06748	0.000255683	0.000301318
SAA1	6.84766	13.2945	6.44687	0.000290953	0.000341856
CTNNAL1	4.2065	5.23666	1.03016	0.000356665	0.000417592
SDC2	3.7162	4.96599	1.24979	0.000465283	0.000542624
CX3CL1	3.25004	5.43376	2.18371	0.000469604	0.000547547
IFI27	18.3923	24.9905	6.59823	0.000753421	0.000872729
IGLV3-10	2.17291	4.53859	2.36568	0.000763622	0.000884172
IGHV4-61	1.32962	2.57822	1.2486	0.00088423	0.00102156
TRIB2	4.09211	5.35186	1.25975	0.00109857	0.00126454
IGLV3-1	2.98654	5.14742	2.16088	0.00111058	0.00127823
IGLV7-46	1.59434	4.03155	2.43721	0.00205048	0.002337
IGLC2	25.0858	42.1591	17.0733	0.0021063	0.00239887
SAMHD1	6.58023	8.38546	1.80523	0.00213261	0.00242808
IGLV3-27	0.73438	1.84422	1.10984	0.00236823	0.0026905
C1QBP	14.6665	16.9616	2.2951	0.00247186	0.00280677
FABP6	0.850606	1.85885	1.00824	0.00294179	0.00333314
FOS	21.1988	28.9596	7.76082	0.0030498	0.00345266
IGHM	5.3342	10.0303	4.69609	0.00406981	0.00458099
IGHV1-2	1.8951	4.73196	2.83686	0.00414182	0.00466013
LGR4	3.67991	4.78261	1.1027	0.00443296	0.00498158
CD79A	1.67111	2.81596	1.14485	0.0123366	0.0136196
IGKV1-17	2.49529	4.16065	1.66536	0.0170371	0.0186925
PGLYRP3	5.611	8.38648	2.77548	0.0202093	0.0220979
PI3	113.814	274.3	160.486	0.0207752	0.0227031
IGKV3-11	9.37448	16.906	7.53147	0.0233538	0.0254627
FGF3	0.00411718	3.33393	3.32982	0.0356753	0.0386096
FGFRL1	2.2008	4.36087	2.16007	1.39e-35	5.5e-35
